# Supplementary material for: Design of selective divalent chain transfer agents for coordinative chain transfer polymerization of ethylene and its copolymerization with butadiene
Source: Royal Society of Chemistry journal article supplement (doi:10.1039/d2py00155a), 2022-01-01
Supplement: d2py00155a1.pdf [file d2py00155a1.pdf]

## **Supporting Information**

### Design of selective divalent chain transfer agent for coordinative chain transfer polymerization of ethylene and its copolymerization with butadiene

*Nicolas Baulu,<sup>a,c,d</sup> Marie-Noëlle Poradowski,<sup>b,c,d</sup> Ludmilla Verrieux,<sup>b,d</sup> Julien Thuilliez,<sup>c</sup> François Jean-Baptiste-dit-Dominique,<sup>c,d</sup>  
Lionel Perrin,<sup>\*b,d</sup> Franck D'Agosto,<sup>\*a,d</sup> and Christophe Boisson<sup>\*a,d</sup>*

<sup>a</sup> Univ Lyon, Université Claude Bernard Lyon 1, CPE Lyon, CNRS, UMR 5128, Catalysis, Polymerization, Processes and Materials (CP2M), 43 Bd du 11 Novembre 1918, 69616 Villeurbanne, France

<sup>b</sup> Univ Lyon, Université Claude Bernard Lyon I, CNRS, INSA, CPE, UMR 5246, ICBMS, 1 rue Victor Grignard, F-69622 Villeurbanne cedex, France

<sup>c</sup> Manufacture Michelin, 23 places Carmes Déchaux, F-63000 Clermont-Ferrand, France

<sup>d</sup> *ChemistLab, Michelin CP2M ICBMS joint Laboratory 69616 Villeurbanne, France.*

## NMR Spectra

**Figure S1.**  $^1\text{H}$  NMR in TCE/ $\text{C}_6\text{D}_6$  at 363K of the polyethylene obtained with  $\{(\text{Me}_2\text{Si}(\text{C}_{13}\text{H}_8)_2)\text{Nd}(\mu\text{-BH}_4)[(\mu\text{-BH}_4)\text{Li}(\text{THF})]\}_2/\text{MgPh}_2$  (run 2). \*: solvent impurity.

**Figure S2.**  $^1\text{H}$  NMR in  $\text{C}_6\text{D}_6$  at 298K of an aliquot of  $\text{PhMg}(\text{CH}_2)_5\text{MgPh}$  (**2b**) in solution in toluene. The solvent was evaporated before addition of  $\text{C}_6\text{D}_6$ .  $\Delta$  : MeTHF, \* toluene,  $\psi$  : dibutylether.

**Figure S3.**  $^1\text{H}$  NMR in TCE/ $\text{C}_6\text{D}_6$  at 363K of the polyethylene obtained with  $\{(\text{Me}_2\text{Si}(\text{C}_{13}\text{H}_8)_2)\text{Nd}(\mu\text{-BH}_4)[(\mu\text{-BH}_4)\text{Li}(\text{THF})]\}_2/\mathbf{2b}$  (run 2).

**Figure S4.**  $^1\text{H}$  NMR in TCE/ $\text{C}_6\text{D}_6$  at 363K of the poly(ethylene-*co*-butadiene) obtained with  $\{(\text{Me}_2\text{Si}(\text{C}_{13}\text{H}_8)_2)\text{Nd}(\mu\text{-BH}_4)[(\mu\text{-BH}_4)\text{Li}(\text{THF})]\}_2/\mathbf{2b}$  (run 3).

**Figure S5.**  $^{13}\text{C}$  NMR in  $\text{C}_6\text{D}_6$  at 340K of  $\text{MesMg}(\text{CH}_2)_5\text{MgMes}$  (**2c**).  $\Delta$  : MeTHF.  $\Omega$  : dioxane.

**Figure S6.** Two-dimensional NMR correlations  $^1\text{H}/^{13}\text{C}$  HMBC in  $\text{C}_6\text{D}_6$  at 340K of  $\text{MesMg}(\text{CH}_2)_5\text{MgMes}$  (**2c**).

**Figure S7.** Two-dimensional NMR correlations  $^1\text{H}/^1\text{H}$  NOESY at 298K of  $\text{MesMg}(\text{CH}_2)_5\text{MgMes}$  (**2c**).

**Figure S8.** Two-dimensional NMR correlations  $^1\text{H}/^1\text{H}$  COSY at 298K of  $\text{MesMg}(\text{CH}_2)_5\text{MgMes}$  (**2c**).

**Figure S9.** Two-dimensional NMR correlations  $^1\text{H}/^{13}\text{C}$  HMQC in  $\text{C}_6\text{D}_6$  at 298K of  $\text{MesMg}(\text{CH}_2)_5\text{MgMes}$  (**2c**).

**Figure S10.**  $^1\text{H}$  NMR in TCE/ $\text{C}_6\text{D}_6$  at 363K of the polyethylene obtained with  $\{(\text{Me}_2\text{Si}(\text{C}_{13}\text{H}_8)_2)\text{Nd}(\mu\text{-BH}_4)[(\mu\text{-BH}_4)\text{Li}(\text{THF})]\}_2/\mathbf{2c}$  after deactivation with MeOH (run 4).

**Figure S11.**  $^{13}\text{C}$  NMR in TCE/ $\text{C}_6\text{D}_6$  at 363K of the polyethylene with deuterated chain-ends obtained with  $\{(\text{Me}_2\text{Si}(\text{C}_{13}\text{H}_8)_2)\text{Nd}(\mu\text{-BH}_4)[(\mu\text{-BH}_4)\text{Li}(\text{THF})]\}_2/\mathbf{2c}$  (run 5).

**Figure S12.**  $^1\text{H}$  NMR in TCE/ $\text{C}_6\text{D}_6$  at 363K of a typical poly(ethylene-*co*-butadiene) (run 7)

## Molecular Modeling

### ➤ Speciation

**Figure S13.** Speciation of **A** : polymetallic neodymium species for phenyl and mesityl groups, **B** : phenyl organomagnesium co-catalyst and **C** : mesityl organomagnesium co-catalyst.  $\Delta G$  in purple in kcal.mol $^{-1}$ . [Nd] correspond to  $[(\text{Me}_2\text{Si}(\text{C}_{13}\text{H}_8)_2)\text{Nd}]$ .

### ➤ Dependence on DFT functionals

**Figure S14.** Isodesmic equilibria considered to assess initiation selectivity depending on the CTA.

**Table S1.** Gibbs activation energy differences for ethylene insertion between alkyl and aryl groups as illustrated in Figure S14.

### ➤ Cartesian coordinates and associated energies of optimized structures

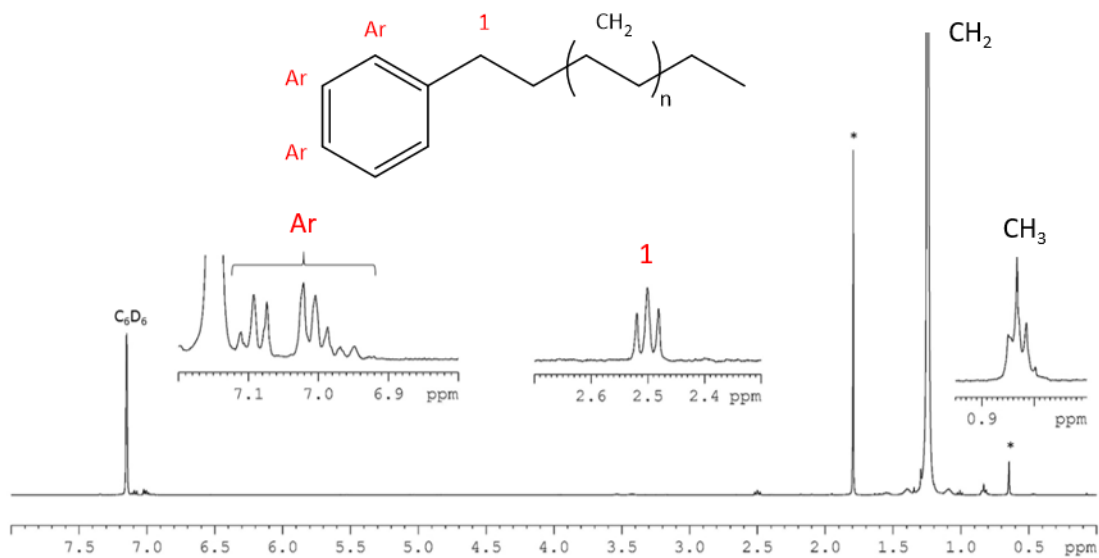

**Figure S1.**  $^1\text{H}$  NMR in TCE/ $\text{C}_6\text{D}_6$  at 363K of the polyethylene obtained with  $\{(\text{Me}_2\text{Si}(\text{C}_{13}\text{H}_8)_2)\text{Nd}(\mu\text{-BH}_4)[(\mu\text{-BH}_4)\text{Li}(\text{THF})]\}_2/\text{MgPh}_2$  (run 1). \*: solvent impurity

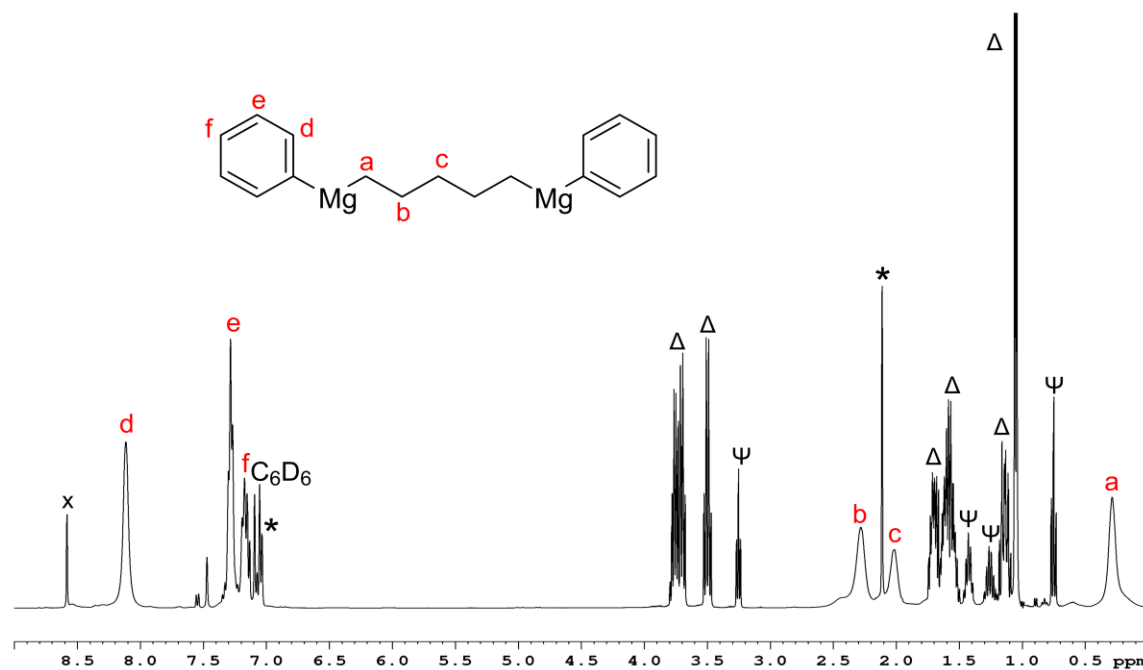

**Figure S2.**  $^1\text{H}$  NMR in  $\text{C}_6\text{D}_6$  at 298K of an aliquot of  $\text{PhMg}(\text{CH}_2)_5\text{MgPh}$  (**2b**) in solution in toluene. The solvent was evaporated before addition of  $\text{C}_6\text{D}_6$ .  $\Delta$ : MeTHF, \* toluene,  $\psi$ : dibutylether

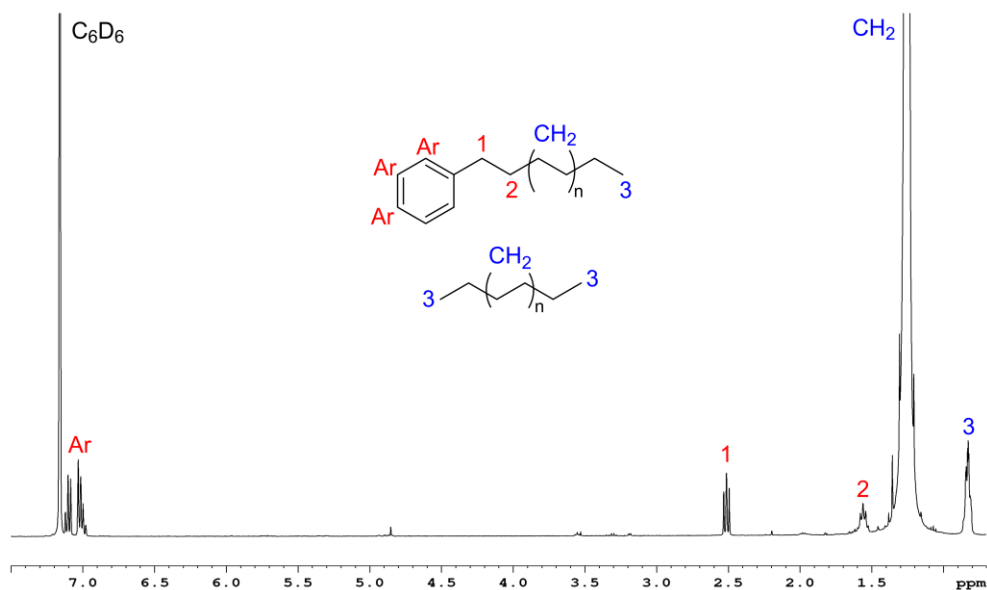

**Figure S3.**  $^1\text{H}$  NMR in TCE/ $\text{C}_6\text{D}_6$  at 363K of the polyethylene obtained with  $\{(\text{Me}_2\text{Si}(\text{C}_{13}\text{H}_8)_2)\text{Nd}(\mu\text{-BH}_4)[(\mu\text{-BH}_4)\text{Li}(\text{THF})]\}_2/\mathbf{2b}$  (run 2)

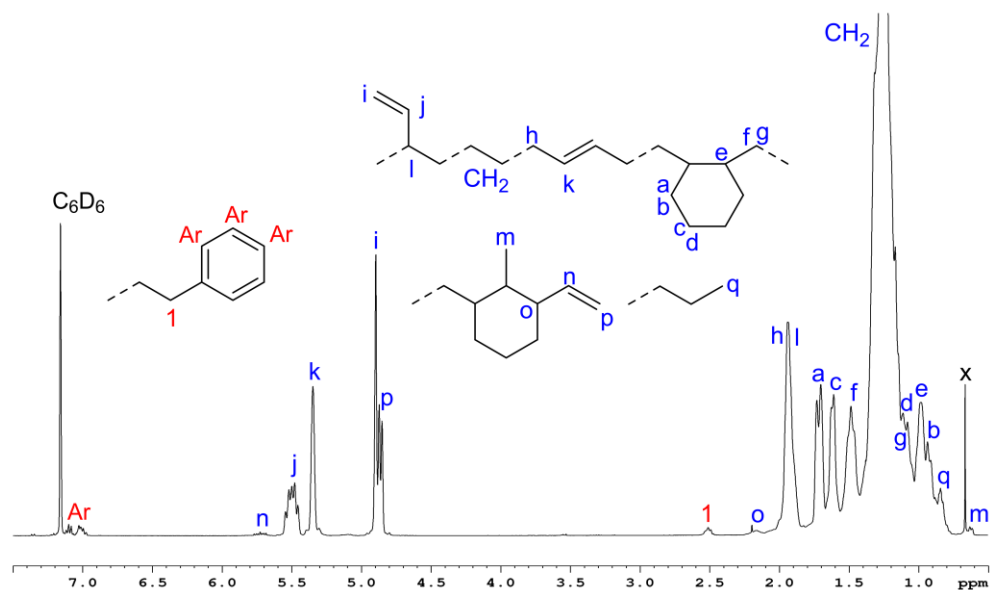

**Figure S4.** <sup>1</sup>H NMR in TCE/C<sub>6</sub>D<sub>6</sub> at 363K of the poly(ethylene-*co*-butadiene) obtained with  $\{(\text{Me}_2\text{Si}(\text{C}_{13}\text{H}_8)_2\text{Nd}(\mu\text{-BH}_4)[(\mu\text{-BH}_4)\text{Li}(\text{THF})]\}_2/\mathbf{2b}$  (run 3)

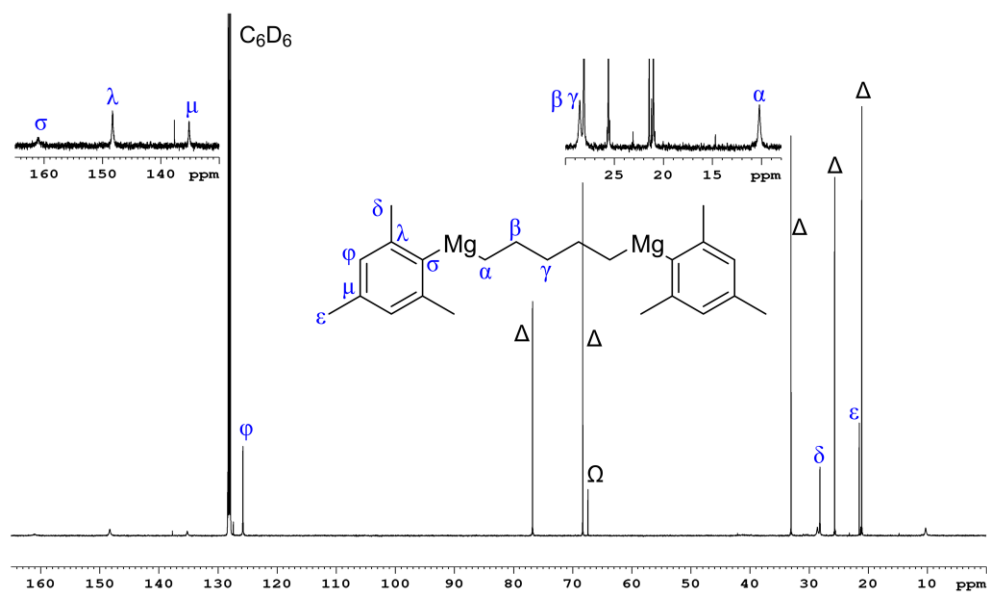

**Figure S5.**  $^{13}\text{C}$  NMR in  $\text{C}_6\text{D}_6$  at 340K of  $\text{MesMg}(\text{CH}_2)_5\text{MgMes}$  (**2c**).  $\Delta$ : MeTHF.  $\Omega$ : dioxane

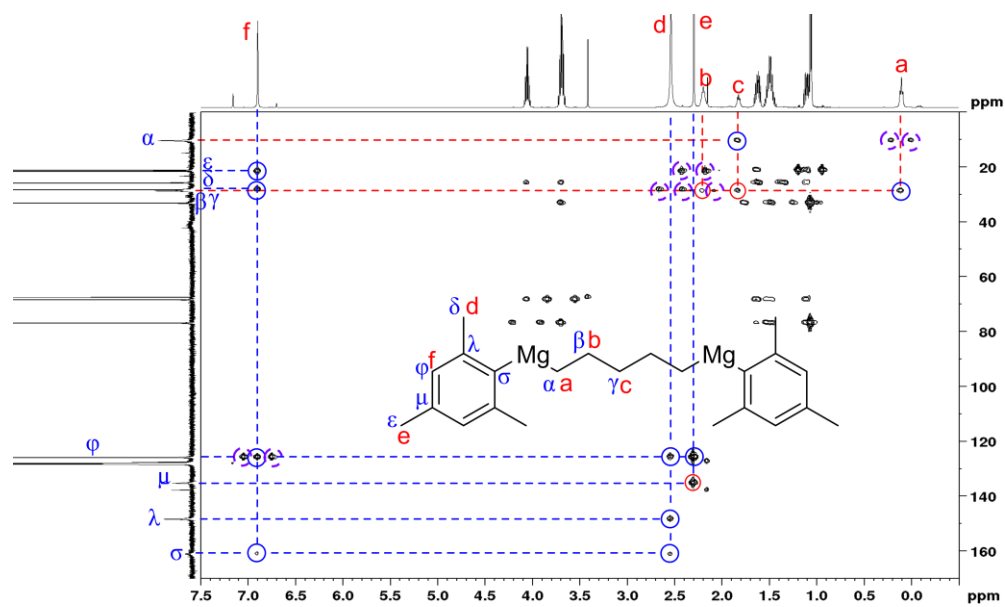

**Figure S6.** Two-dimensional NMR correlations  $^1\text{H}/^{13}\text{C}$  HMBC in  $\text{C}_6\text{D}_6$  at 340K of  $\text{MesMg}(\text{CH}_2)_5\text{MgMes}$  (**2c**)



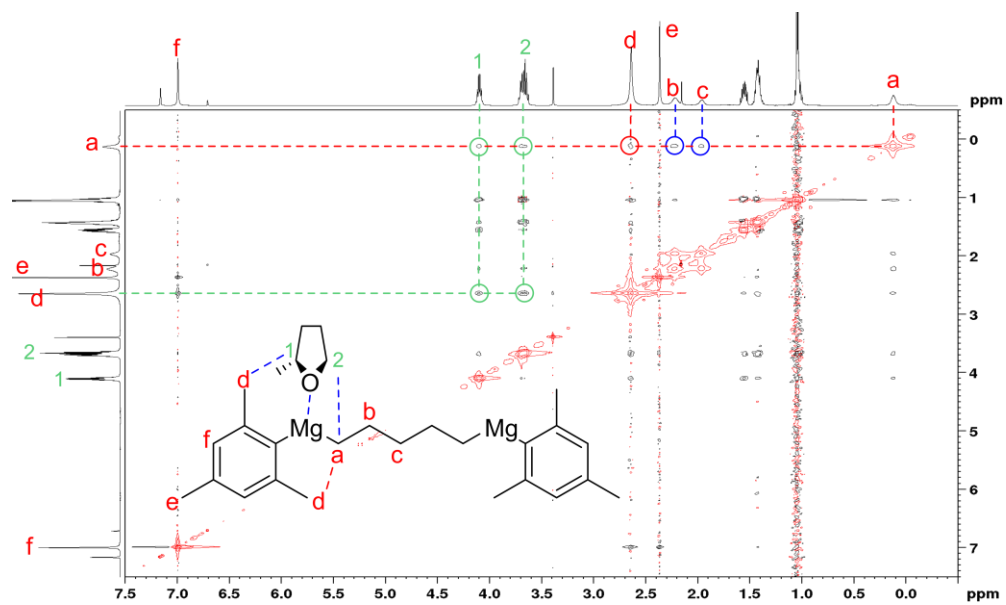

**Figure S7.** Two-dimensional NMR correlations  $^1\text{H}/^1\text{H}$  NOESY at 298K of  $\text{MesMg}(\text{CH}_2)_5\text{MgMes}$  (**2c**)

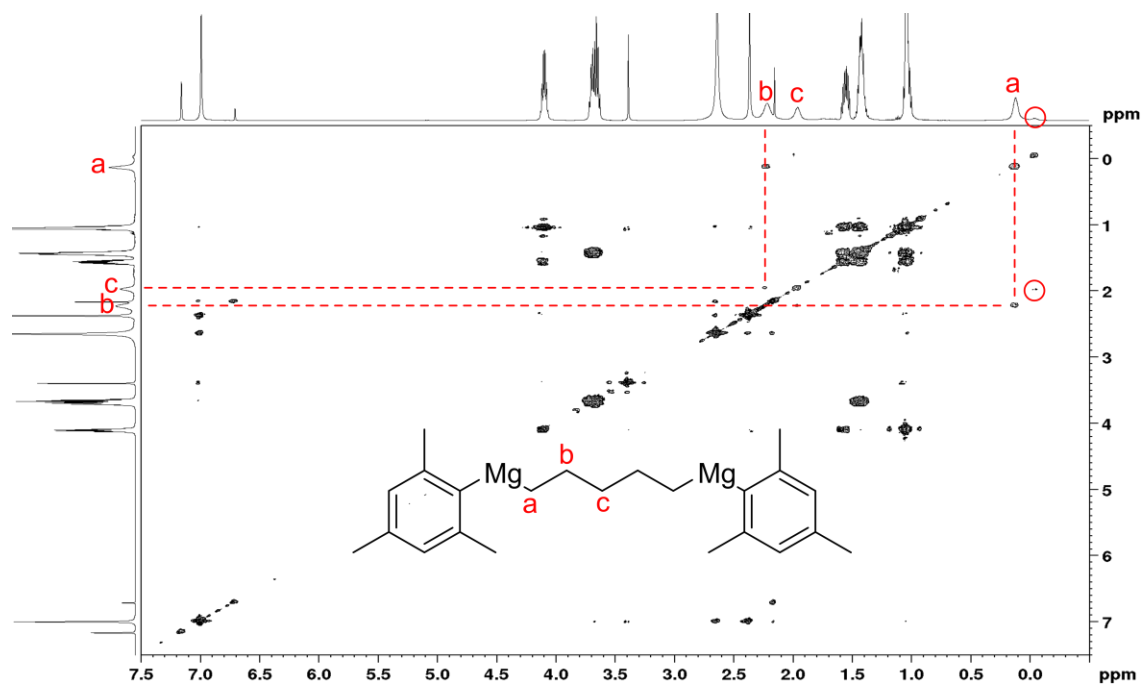

**Figure S8.** Two-dimensional NMR correlations <sup>1</sup>H/<sup>1</sup>H COSY at 298K of MesMg(CH<sub>2</sub>)<sub>5</sub>MgMes (2c)

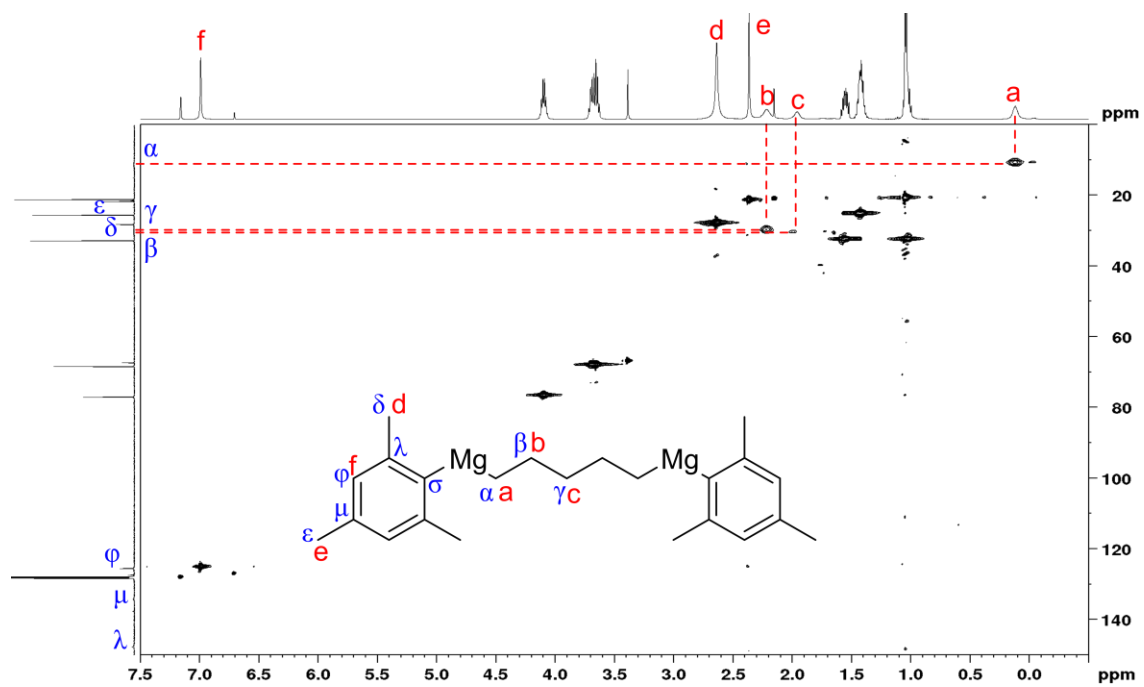

**Figure S9.** Two-dimensional NMR correlations  $^1\text{H}/^{13}\text{C}$  HMQC in  $\text{C}_6\text{D}_6$  at 298K of MesMg(CH<sub>2</sub>)<sub>5</sub>MgMes (**2c**)

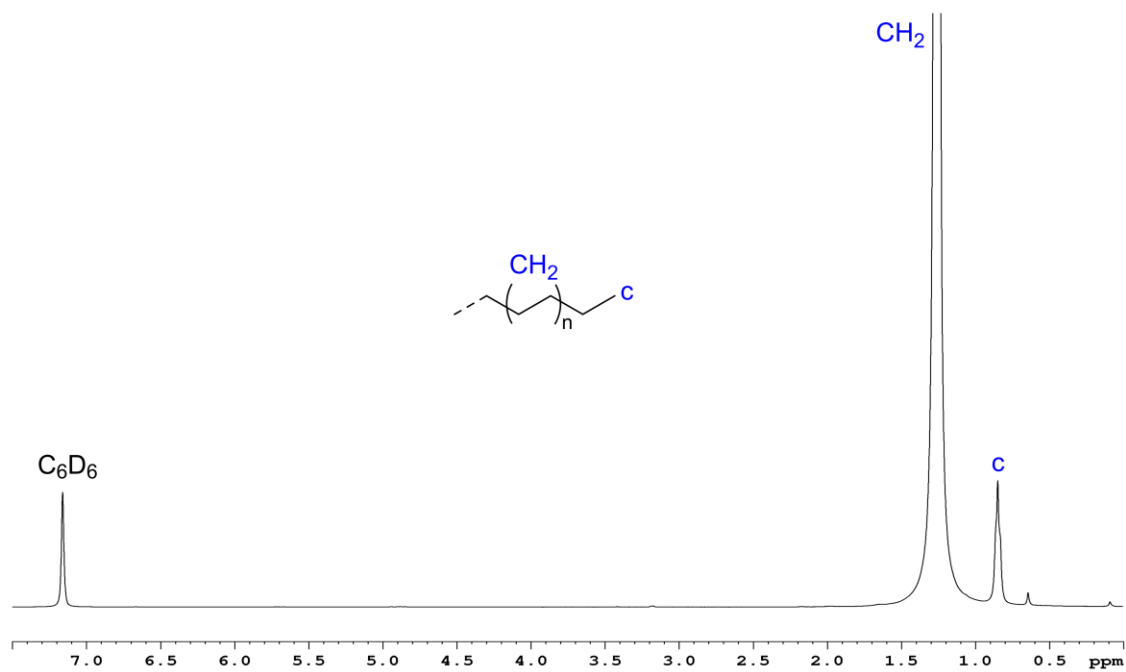

**Figure S10.**  $^1\text{H}$  NMR in TCE/ $\text{C}_6\text{D}_6$  at 363K of the polyethylene obtained with  $\{(\text{Me}_2\text{Si}(\text{C}_{13}\text{H}_8)_2)\text{Nd}(\mu\text{-BH}_4)[(\mu\text{-BH}_4)\text{Li}(\text{THF})]\}_2/\mathbf{2c}$  after deactivation with MeOH (run 4)

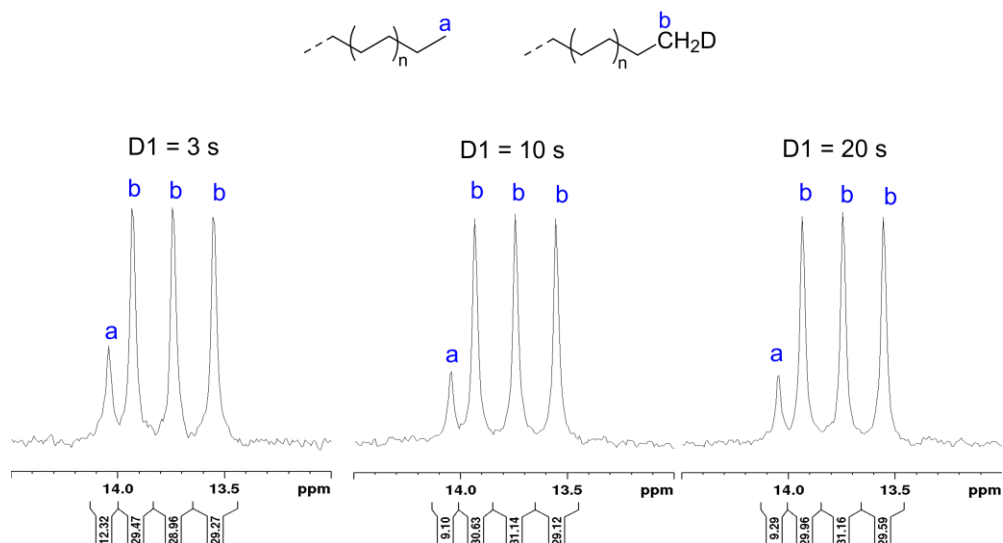

**Figure S11.**  $^{13}\text{C}$  NMR in TCE/ $\text{C}_6\text{D}_6$  at 363K of the polyethylene with deuterated chain-ends obtained with  $\{(\text{Me}_2\text{Si}(\text{C}_{13}\text{H}_8)_2)\text{Nd}(\mu\text{-BH}_4)[(\mu\text{-BH}_4)\text{Li}(\text{THF})]\}_2/2\mathbf{c}$  (run 5)

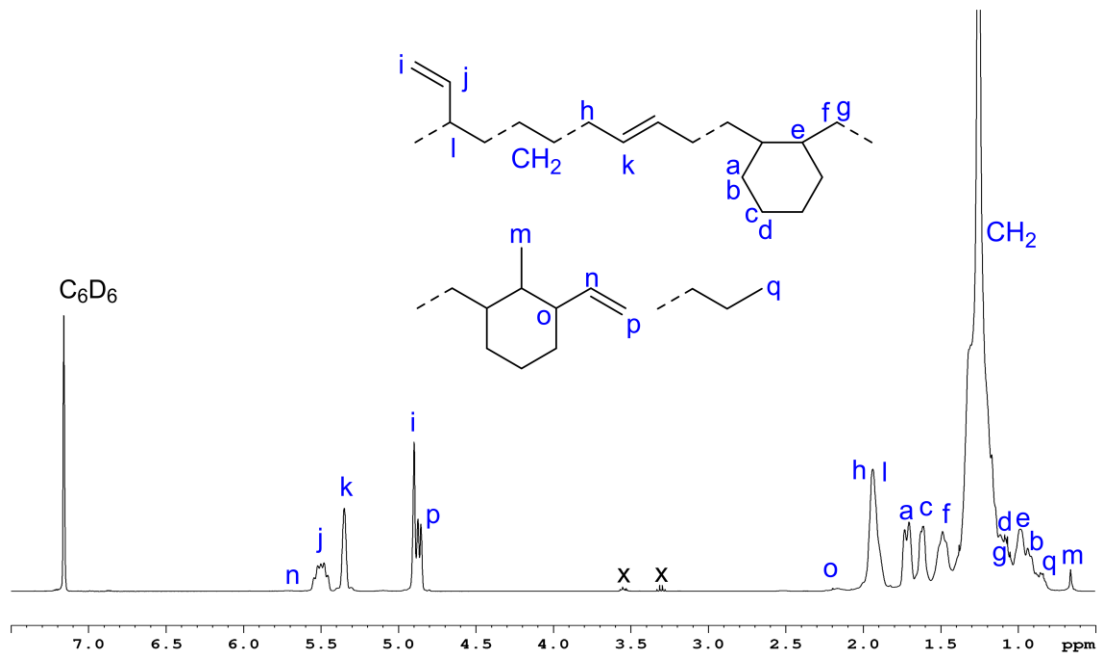

**Figure S12.**  $^1\text{H}$  NMR in TCE/ $\text{C}_6\text{D}_6$  at 363K of a typical poly(ethylene-co-butadiene) (run 7)

## DFT Calculations

- **Speciation**

Structure of polymetallic species are based on our previous papers:

> H. Nsiri, I. Belaid, P. Larini, J. Thuilliez, C. Boisson, L. Perrin, Ethylene-Butadiene Copolymerization by Neodymocene Complexes: A Ligand Structure/Activity/Polymer Microstructure Relationship based on DFT Calculations, *ACS Catal.*, **2016**, 6, 1028-1036.

> I. Belaid, B. Macqueron, M.-N. Poradowski, S. Bouaouli, J. Thuilliez, F. Da Cruz-Boisson, V. Monteil, F. D'Agosto, L. Perrin, C. Boisson, Identification of a Transient but Key Motif in the Living Coordinative Chain Transfer Cyclocopolymerization of Ethylene with Butadiene, *ACS Catal.* **2019**, 9, 9298-9309.

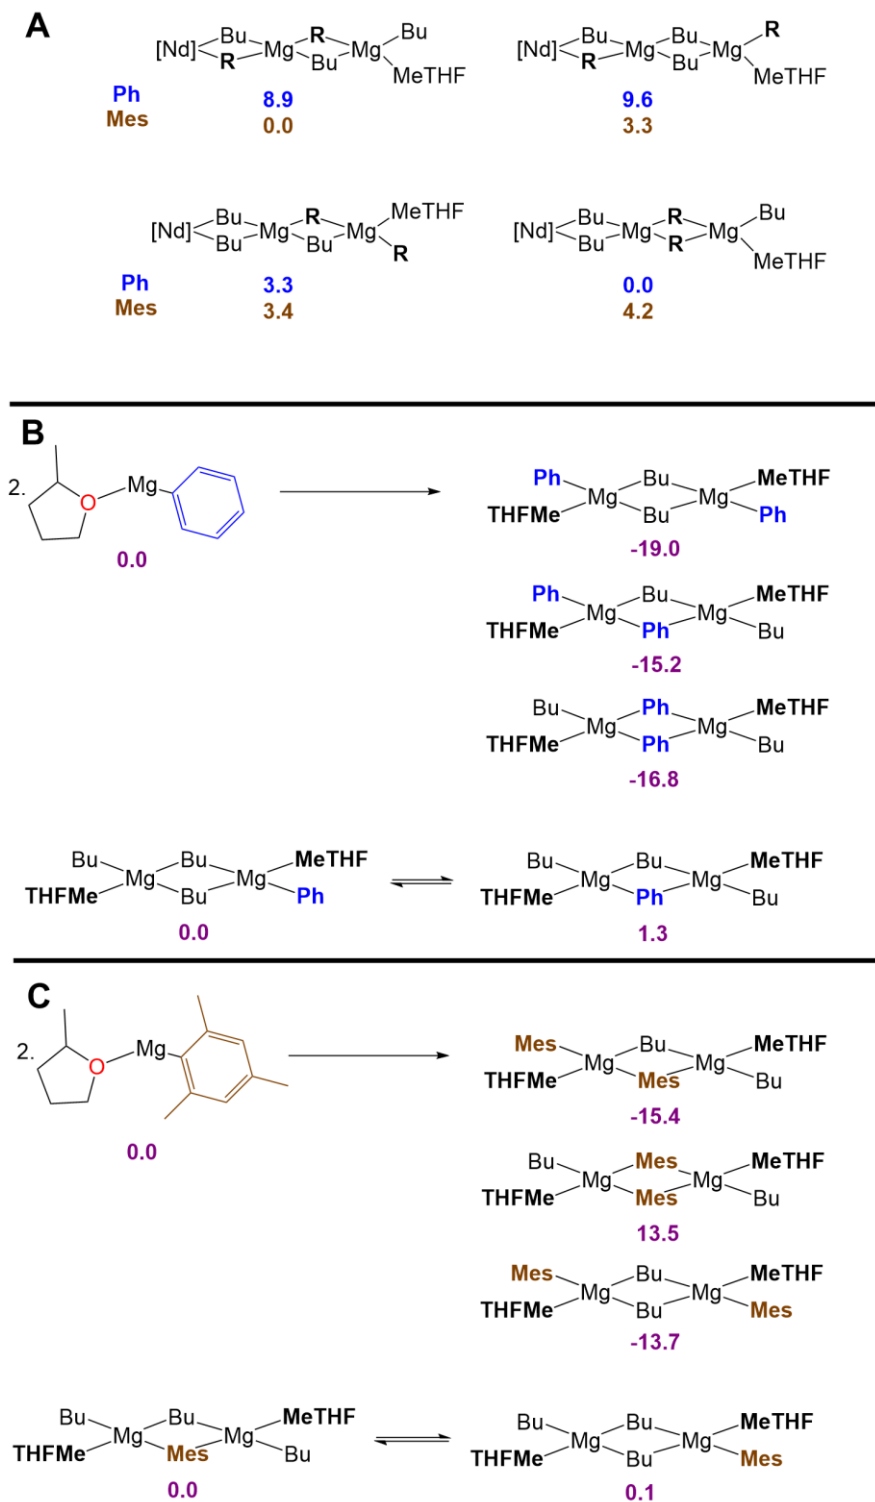

**Figure S13.** Speciation of **A** : polymetallic neodymium species for phenyl and mesityl groups, **B** : phenyl organomagnesium co-catalyst and **C** : mesityl organomagnesium co-catalyst.  $\Delta G$  in purple in kcal mol<sup>-1</sup>. [Nd] correspond to [(Me<sub>2</sub>Si(C<sub>13</sub>H<sub>8</sub>)<sub>2</sub>)Nd].



- **Dependence on DFT functionals**

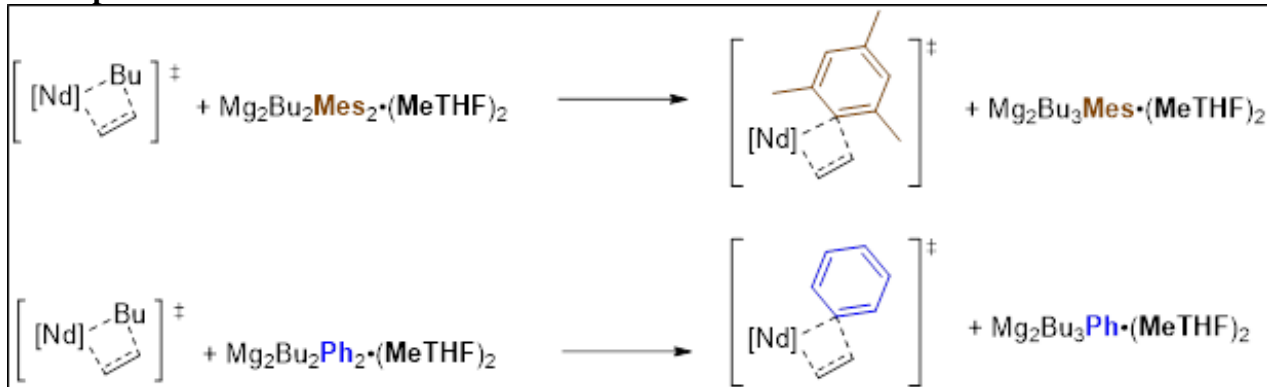

**Figure S14.** Isodesmic equilibria considered to assess initiation selectivity depending on the CTA.

| $\Delta G$ (kcal mol <sup>-1</sup> ) |        |     |        |
|--------------------------------------|--------|-----|--------|
| Ar                                   | B3PW91 | M06 | WB97xd |
| Ph                                   | 3.9    | 2.6 | 2.6    |
| Mes                                  | 11.1   | 4.0 | 7.2    |

**Table S1.** Gibbs activation energy differences for ethylene insertion between alkyl and aryl groups as illustrated in **Figure S14**.

- **Cartesian coordinates and associated energies of optimized structures**

|                                            |    |             |             |             |
|--------------------------------------------|----|-------------|-------------|-------------|
| SiFlu2_Bu_MeTHF                            | H  | 0.13531144  | 3.47113885  | 0.54926997  |
| 81                                         | H  | 1.82622554  | 1.67086650  | 0.68923595  |
| E: -1547.25420209 ; H: -1546.539785 ; G: - | H  | 2.42786738  | 0.36225964  | -1.32783418 |
| 1546.655840 ; D: -0.2308113                | H  | 1.38447174  | 0.81601634  | -3.49390222 |
| C                                          | C  | -2.63636761 | 6.08666762  | -1.88147929 |
| C                                          | C  | -2.88408249 | 5.93919328  | -3.25981440 |
| C                                          | H  | -1.60294073 | 5.31954909  | -0.16604152 |
| C                                          | H  | -3.11710482 | 6.88903664  | -1.33193284 |
| C                                          | H  | -3.56103922 | 6.62900167  | -3.75420072 |
| C                                          | H  | -2.49409206 | 4.86205708  | -5.05845067 |
| C                                          | C  | -3.15280831 | -2.81793113 | -4.07692639 |
| C                                          | C  | -1.87944157 | -2.28629675 | -3.82399302 |
| C                                          | H  | -5.09076550 | -2.46797363 | -4.93622644 |
| C                                          | H  | -3.39068442 | -3.82645954 | -3.75482038 |
| Nd                                         | H  | -1.13999818 | -2.89224379 | -3.30857669 |
| C                                          | H  | -0.53072409 | -0.64252386 | -4.04847238 |
| C                                          | Si | -0.80903432 | 2.15485165  | -5.60631986 |
| C                                          | C  | 0.67322322  | 1.07801920  | -6.09324361 |
| C                                          | H  | 0.55720148  | 0.80863125  | -7.14913775 |
| C                                          | H  | 1.60665891  | 1.64225642  | -5.99586601 |
| C                                          | H  | 0.77470065  | 0.14328813  | -5.54007273 |
| C                                          | C  | -0.86956496 | 3.46886744  | -6.96938712 |
| C                                          | H  | 0.12430164  | 3.92452172  | -7.04506876 |
| C                                          | H  | -1.09148877 | 2.99443567  | -7.93093320 |
| C                                          | H  | -1.58356712 | 4.27965184  | -6.82110121 |

|   |             |             |             |    |             |             |             |
|---|-------------|-------------|-------------|----|-------------|-------------|-------------|
| C | -5.52583702 | 2.43336046  | -7.25277440 | C  | -5.59097926 | -0.38023706 | -6.84977620 |
| C | -6.34587797 | 1.30846899  | -7.05611225 | C  | -3.91580323 | -2.30167827 | -4.76572330 |
| H | -3.62032954 | 3.35352579  | -6.95165647 | C  | -1.64090304 | -0.89349904 | -3.88254320 |
| H | -5.91847588 | 3.28776375  | -7.79626403 | C  | 1.44520883  | 2.11226706  | -0.30997448 |
| H | -7.35889542 | 1.30547273  | -7.44508724 | C  | 1.66785758  | 1.22842767  | -1.38535718 |
| H | -6.48885884 | -0.66591403 | -6.22516786 | H  | 0.42133931  | 3.87419631  | 0.36289797  |
| C | -4.85997346 | 2.86082325  | -2.05012973 | H  | 1.97392689  | 1.96465634  | 0.62614151  |
| H | -4.95391586 | 2.51803002  | -1.00146452 | H  | 2.37458332  | 0.41294553  | -1.26387223 |
| H | -4.63395131 | 3.93633080  | -1.97324826 | H  | 1.25825582  | 0.72050536  | -3.41775363 |
| C | -6.20190125 | 2.67193826  | -2.76228287 | C  | -2.26546715 | 6.43424761  | -2.21003225 |
| H | -6.41924142 | 1.60210467  | -2.91016410 | C  | -2.63300017 | 6.14186255  | -3.53568233 |
| H | -6.14443861 | 3.09097616  | -3.77607869 | H  | -1.15678758 | 5.80030643  | -0.48805957 |
| C | -7.41190216 | 3.29730451  | -2.05540807 | H  | -2.64435352 | 7.33221233  | -1.73394916 |
| H | -7.48368832 | 2.88298783  | -1.04075464 | H  | -3.29566104 | 6.81938897  | -4.06500069 |
| H | -7.22920360 | 4.37212971  | -1.92914704 | H  | -2.44263188 | 4.83935440  | -5.21487930 |
| C | -8.73179391 | 3.08162000  | -2.79003516 | C  | -3.01492524 | -2.89900755 | -3.88837924 |
| H | -8.95922109 | 2.01457040  | -2.89447026 | C  | -1.88792287 | -2.19461358 | -3.45259748 |
| H | -9.57131494 | 3.54655511  | -2.26228876 | H  | -4.78636471 | -2.85444584 | -5.10800050 |
| H | -8.69870402 | 3.50716089  | -3.79886970 | H  | -3.17963627 | -3.91710252 | -3.55076671 |
| O | -2.85745725 | 0.14316413  | -0.80851396 | H  | -1.17999568 | -2.67722675 | -2.78551463 |
| C | -3.97505253 | -0.11776369 | 0.11311464  | H  | -0.72624477 | -0.39917542 | -3.56577180 |
| C | -1.65312393 | -0.49462614 | -0.31093417 | Si | -0.90170035 | 2.03672376  | -5.59700332 |
| C | -3.36831175 | -0.96534255 | 1.23149138  | C  | 0.53951239  | 0.88842217  | -6.04223814 |
| H | -4.27796290 | 0.86121047  | 0.49623948  | H  | 0.40043220  | 0.56222300  | -7.07907820 |
| C | -5.12054754 | -0.77020316 | -0.62488900 | H  | 1.49315820  | 1.42362704  | -5.98628146 |
| C | -1.88113566 | -0.62630103 | 1.18050682  | H  | 0.61105014  | -0.01624850 | -5.43587676 |
| H | -1.54731992 | -1.47098094 | -0.79507914 | C  | -0.95869091 | 3.26690033  | -7.03534380 |
| H | -0.80077853 | 0.13336096  | -0.57613514 | H  | 0.00797110  | 3.78059614  | -7.08397962 |
| H | -3.52235142 | -2.02883266 | 1.02047589  | H  | -1.09203978 | 2.71991125  | -7.97441401 |
| H | -3.83127832 | -0.74160774 | 2.19438895  | H  | -1.73150653 | 4.03452088  | -6.98450009 |
| H | -5.93980772 | -0.96771059 | 0.07343770  | C  | -5.38064737 | 1.82659193  | -7.80704664 |
| H | -5.51425282 | -0.12475805 | -1.41371824 | C  | -6.07398108 | 0.61198624  | -7.68717605 |
| H | -4.80813779 | -1.71975374 | -1.06756160 | H  | -3.70573296 | 3.01528318  | -7.21584589 |
| H | -1.24734138 | -1.39452500 | 1.62792444  | H  | -5.76666758 | 2.59585821  | -8.46958169 |
| H | -1.67650001 | 0.32529373  | 1.67992838  | H  | -6.98543673 | 0.45160494  | -8.25408427 |

SiFlu2\_Mes\_MeTHF

88

E: -1738.96414132 ; H: -1738.193398 ; G: -

1738.316082 ; D: -0.26545047

|    |             |             |             |   |             |             |             |
|----|-------------|-------------|-------------|---|-------------|-------------|-------------|
| C  | -3.69716710 | 1.07597968  | -6.24166270 | H | -4.51102459 | 0.53399635  | 0.42682319  |
| C  | -2.51424107 | 1.05486474  | -5.38547389 | C | -5.10484585 | -0.71339869 | -1.21298266 |
| C  | -2.52517276 | -0.26983583 | -4.79074355 | C | -2.19479723 | -0.86214166 | 1.13957936  |
| C  | -3.68615297 | -1.00309614 | -5.21710595 | H | -1.21590925 | -0.95996175 | -0.79879618 |
| C  | -4.41039891 | -0.15871225 | -6.13327976 | H | -1.02438051 | 0.61642348  | 0.00846260  |
| C  | 0.13048064  | 2.47263468  | -2.78793622 | H | -3.47141726 | -2.31895562 | 0.16227796  |
| C  | -0.63240234 | 2.90631759  | -3.93690720 | H | -4.23350815 | -1.56380464 | 1.57438170  |
| C  | -1.27886788 | 4.13159350  | -3.51472574 | H | -5.97874490 | -1.14137189 | -0.71257662 |
| C  | -0.95548410 | 4.41772583  | -2.14128989 | H | -5.46519176 | 0.13980693  | -1.79448048 |
| C  | -0.08425290 | 3.36769222  | -1.68042580 | H | -4.68603217 | -1.46859334 | -1.88301381 |
| Nd | -2.79094607 | 1.86048599  | -2.77665785 | H | -1.51846541 | -1.64430176 | 1.48975305  |
| C  | 1.02738693  | 1.39176878  | -2.59870672 | H | -2.28730725 | -0.11215218 | 1.93059376  |
| C  | 0.57532194  | 3.17612163  | -0.45483030 | C | -4.84237460 | 3.01853461  | -1.75535579 |
| C  | -1.43739405 | 5.57625881  | -1.51283497 | C | -4.85593091 | 3.47809663  | -0.42173691 |
| C  | -2.16185165 | 5.01512896  | -4.18361064 | C | -6.06043534 | 3.15198931  | -2.47126501 |
| C  | -4.21309716 | 2.06470078  | -7.09860207 | C | -6.01618048 | 4.01014139  | 0.16049053  |

C -7.20605316 3.67944591 -1.87737964  
C -7.20653387 4.11229626 -0.54843440  
H -5.98414990 4.35796004 1.19229764  
H -8.12115846 3.76451969 -2.46164999  
C -6.13994962 2.74470149 -3.92384309  
H -5.47074054 3.34878672 -4.54611611  
H -5.87638470 1.69273750 -4.08622286  
H -7.14745914 2.87191597 -4.32891756  
C -3.62540445 3.41666484 0.45487328  
H -2.70922483 3.28151729 -0.12610464  
H -3.50087181 4.34093603 1.02813152  
H -3.68063294 2.59971952 1.18447954  
C -8.45310709 4.67552150 0.07802664  
H -8.83055546 5.53532076 -0.48579211  
H -9.25734673 3.93166395 0.10308694  
H -8.27179599 5.00347294 1.10475555

SiFlu2\_Ph\_MeTHF

79

E: -1621.03619342 ; H: -1620.352970 ; G: -1620.467696 ; D: -0.23928454

C -3.69386189 1.35393716 -6.02012519  
C -2.36469628 1.11912520 -5.47968314  
C -2.41512545 -0.22538839 -4.94455799  
C -3.73296807 -0.78000158 -5.11688710  
C -4.52735420 0.20747884 -5.79968271  
C 0.16240310 2.39493115 -2.77686515  
C -0.58689303 2.91205629 -3.89899622  
C -1.32401997 4.04003609 -3.37001443  
C -1.07754144 4.17547405 -1.95624864  
C -0.14506808 3.14353713 -1.58433167  
Nd -2.75276674 1.69644640 -2.87023090  
C 1.11352925 1.34944141 -2.67578522  
C 0.49263169 2.85537640 -0.36564058  
C -1.65826264 5.22037448 -1.21883534  
C -2.24751614 4.93535261 -3.96652764  
C -4.25670381 2.46659158 -6.67964463  
C -5.85989194 0.18810444 -6.22975085  
C -4.03182554 -2.07250218 -4.67448125  
C -1.45546863 -1.00439656 -4.25332978  
C 1.42305511 1.83570586 -0.30941117  
C 1.72890724 1.08975042 -1.46691699  
H 0.27266138 3.44545230 0.51943483  
H 1.93536853 1.61683642 0.62186302  
H 2.47732735 0.30493800 -1.40952878  
H 1.40081246 0.78393426 -3.55445434  
C -2.51323029 6.10357133 -1.84823571  
C -2.81403895 5.94587242 -3.21350520  
H -1.43106363 5.33673899 -0.16300817  
H -2.96808114 6.91388818 -1.28885449  
H -3.50810228 6.63299918 -3.68677565  
H -2.49314480 4.85695985 -5.01855199  
C -3.05615861 -2.82490467 -4.03690712  
C -1.77972922 -2.28366380 -3.82171756  
H -5.02195237 -2.48910506 -4.83586407  
H -3.27829153 -3.83326767 -3.70335862

H -1.02284051 -2.88158606 -3.32270315  
H -0.44966042 -0.63220113 -4.09033626  
Si -0.79144026 2.16449013 -5.62726873  
C 0.69010729 1.10437828 -6.15145453  
H 0.56111421 0.85343491 -7.21036333  
H 1.62233012 1.67067458 -6.05565840  
H 0.80173235 0.16059331 -5.61607967  
C -0.89851030 3.48921221 -6.97594748  
H 0.08418387 3.96630874 -7.06341895  
H -1.12602320 3.01805522 -7.93786428  
H -1.62695502 4.28308658 -6.80909679  
C -5.57535138 2.42653846 -7.09744969  
C -6.38074911 1.29500733 -6.87685556  
H -3.66171636 3.35151095 -6.87400971  
H -5.99735335 3.28688135 -7.60828781  
H -7.41078258 1.29215922 -7.21833637  
H -6.47864097 -0.68877217 -6.06131065  
O -2.85055184 0.14771489 -0.85118780  
C -4.00664490 -0.14740255 0.01804375  
C -1.65685240 -0.46437905 -0.30122200  
C -3.42213147 -0.95492491 1.17813694  
H -4.36772924 0.82479106 0.36288850  
C -5.08861021 -0.85435379 -0.76392856  
C -1.94172304 -0.58247454 1.18145308  
H -1.51562619 -1.44429149 -0.76909664  
H -0.80423332 0.17434859 -0.54025639  
H -3.54277576 -2.02636732 0.98685882  
H -3.92845627 -0.72149897 2.11667628  
H -5.92778847 -1.07730343 -0.09731012  
H -5.47552419 -0.22797320 -1.57127357  
H -4.72022675 -1.79464338 -1.18294370  
H -1.30928296 -1.33023039 1.66422174  
H -1.77808557 0.37985969 1.67571087  
C -4.89731129 2.76462495 -2.09757336  
C -5.02135046 3.35895594 -0.82611164  
C -6.07770121 2.73407960 -2.86644343  
C -6.22553981 3.87488908 -0.34628799  
H -4.14924451 3.43765125 -0.17546384  
C -7.29185123 3.24349477 -2.40455906  
H -6.06603483 2.30470274 -3.86854860  
C -7.36893678 3.81659054 -1.13843378  
H -6.27234595 4.32776398 0.64115100  
H -8.17655822 3.19755228 -3.03451492  
H -8.31034605 4.21678240 -0.77330324

MeTHF

16

E: -271.749069419 ; H: -271.597593 ; G: -271.634729 ; D: -0.02082247

C -2.10158663 -0.33652445 0.44516239  
O -0.66768798 -0.35740157 0.40637013  
C -0.16727008 0.92179022 0.01153099  
C -1.38154567 1.77826555 -0.34536950  
C -2.47479462 1.14248160 0.51053827  
H -2.48242930 -0.76253045 -0.49722593  
H 0.39382186 1.35636909 0.84942309

H 0.52454032 0.79582916 -0.82863294  
H -1.22337662 2.83860623 -0.13554947  
H -1.62634029 1.67649984 -1.40759194  
H -2.40983121 1.49658449 1.54600019  
H -3.48562572 1.33773452 0.14468272  
C -2.57858712 -1.18652299 1.60314651  
H -3.67238213 -1.22103399 1.63100061  
H -2.20987698 -2.21147524 1.50827632  
H -2.21742778 -0.78066457 2.55301905

BuMgMes\_MeTHF

50

E: -979.204956167 ; H: -978.740988 ; G: -978.827358  
; D: -0.09457181

C 0.24387856 1.29373077 0.36464307  
C -0.57701932 2.32563586 -0.42235525  
H 0.90116331 0.75297267 -0.33782021  
H 0.93966032 1.83461156 1.02933737  
H -1.26502443 1.81221409 -1.11111178  
H -1.22845340 2.88891700 0.26242166  
Mg -0.89952224 -0.12761424 1.49757283  
C 0.24288044 3.33361037 -1.23684538  
H 0.88514463 2.78398078 -1.93804462  
H 0.92348593 3.86642539 -0.55936154  
C -0.60584468 4.34250322 -2.00570479  
H -1.27882082 3.84092964 -2.71039178  
H -1.22793743 4.93855039 -1.32848561  
C -2.84064864 -0.52504586 2.34470875  
C -3.10856085 -0.34243970 3.71734198  
C -3.92350338 -0.94998477 1.54344161  
C -4.37656247 -0.59029223 4.25464688  
C -5.18555239 -1.19575783 2.09163399  
C -5.43208849 -1.02214976 3.45381133  
H -4.54887491 -0.44177805 5.31949962  
H -5.99861614 -1.52428546 1.44564481  
H 0.01224021 5.03924798 -2.58196282  
O 0.41851385 -1.71243730 1.95293904  
C 0.09272351 -3.03825750 2.49957340  
C 1.85502644 -1.52493420 1.92305929  
C 1.44962281 -3.67643975 2.79614380  
H -0.45828755 -2.85323992 3.42628739  
C -0.77361423 -3.80458457 1.52653439  
C 2.38338441 -2.48182481 2.97291083  
H 2.22527884 -1.77377336 0.92275583  
H 1.77035985 -4.28568337 1.94409728  
H 1.40291763 -4.32373407 3.67400830  
H -0.98057626 -4.80184718 1.92767583  
H -1.73347544 -3.30633444 1.37315455  
H -0.26903649 -3.92060859 0.56269734  
H 3.43522466 -2.72862440 2.81513275  
H 2.27677953 -2.04754245 3.97162559  
H 2.06202421 -0.47315499 2.12408713  
C -3.74880843 -1.11165906 0.05020398  
H -3.86598059 -0.15246019 -0.46940881  
H -2.75236611 -1.49190398 -0.20394174  
H -4.48027404 -1.80295541 -0.37970352

C -6.80056537 -1.27038053 4.02910421  
H -7.50906394 -0.49175022 3.72311178  
H -7.21114484 -2.22760794 3.69174774  
H -6.77848442 -1.28233200 5.12207002  
C -2.00978051 0.11250986 4.65130592  
H -1.34627568 -0.71583913 4.93072922  
H -1.38655531 0.88512401 4.18600219  
H -2.40626138 0.53258154 5.58049323

BuMgPh\_MeTHF

41

E: -861.267066606 ; H: -860.890316 ; G: -860.965159  
; D: -0.07382036

C 0.19224060 1.21555946 0.21024459  
C -0.63277799 2.21823853 -0.60932436  
H 0.83735240 0.64023291 -0.47554736  
H 0.90004152 1.78006806 0.84197775  
H -1.32253305 1.68077750 -1.27771015  
H -1.28209983 2.80520548 0.05732738  
Mg -0.91454858 -0.13987994 1.44932454  
C 0.18343860 3.19779483 -1.46093341  
H 0.82210449 2.62490583 -2.14662049  
H 0.86742258 3.75242533 -0.80466684  
C -0.66902024 4.18104140 -2.25824139  
H -1.34686831 3.65651022 -2.94129213  
H -1.28637971 4.80023813 -1.59764282  
C -2.84125363 -0.54601259 2.30815403  
C -3.04723108 -0.76110223 3.68591126  
C -4.00986961 -0.58108046 1.52025000  
C -4.30622555 -0.99752323 4.23888282  
H -2.19817693 -0.74206549 4.37042410  
C -5.27790082 -0.81938984 2.05114556  
H -3.94244178 -0.41547714 0.44448626  
C -5.43022154 -1.02943663 3.41851488  
H -4.41247712 -1.15450935 5.30960618  
H -6.14806283 -0.83807494 1.39957797  
H -6.41399975 -1.21340186 3.84051624  
H -0.05383332 4.85700859 -2.86168151  
O 0.44740490 -1.58599604 2.13966153  
C 0.14410528 -2.92825828 2.65853067  
C 1.87546377 -1.34707967 2.17529698  
C 1.50760571 -3.51847564 3.01816768  
H -0.45992919 -2.77189938 3.55701412  
C -0.64292318 -3.71427494 1.63426930  
C 2.38894444 -2.29216653 3.24301232  
H 2.29975638 -1.57508776 1.19177756  
H 1.89058194 -4.11238549 2.18134007  
H 1.44260405 -4.17045100 3.89130930  
H -0.84242135 -4.71998582 2.01749342  
H -1.60756776 -3.24385305 1.42800893  
H -0.08215009 -3.80853305 0.69922304  
H 3.45489369 -2.50063053 3.13164546  
H 2.22274685 -1.86850484 4.23815762  
H 2.03627804 -0.29024457 2.39225690

MeTHFMes\_Mg\_Bu2\_Mg\_MesMeTHF

100  
 E: -1958.41878363 ; H: -1957.487837 ; G: -  
 1957.631296 ; D: -0.23440921  
 C 0.68273982 0.55008600 -0.14615603  
 C -0.37839733 1.18466681 -1.06364167  
 H 0.68060832 -0.53985044 -0.33362780  
 H 1.66971767 0.81884656 -0.56429103  
 H -1.38562372 0.90145658 -0.72965577  
 H -0.34211140 2.27725376 -0.96400139  
 C 0.75189721 1.17345097 3.51054854  
 C 1.86237004 0.58584441 4.40008222  
 H -0.21021483 0.84347742 3.94397928  
 H 0.69904214 2.25822844 3.71734134  
 H 1.89862938 -0.50388623 4.27104094  
 H 2.84496595 0.94484124 4.06588701  
 Mg -0.30272751 -0.08598873 1.84488215  
 Mg 1.70020892 1.84257424 1.50730835  
 C 1.71725464 0.88962771 5.89516151  
 H 1.68493815 1.97811600 6.03375872  
 H 0.74573593 0.51474629 6.24483451  
 C -0.23892756 0.83148189 -2.54822849  
 H -0.25506410 -0.26094191 -2.65708152  
 H 0.75079919 1.15177636 -2.90062826  
 C -1.32119310 1.44563693 -3.43111595  
 H -2.31920052 1.11347071 -3.12506530  
 H -1.30983490 2.54010711 -3.37524748  
 C 2.83248212 0.30136401 6.75438297  
 H 2.86253107 -0.79150084 6.67770657  
 H 3.81341588 0.67782091 6.44460637  
 C 3.84987648 2.27363689 1.60799321  
 C 4.84902922 1.63807392 0.82496084  
 C 4.32148827 3.24642713 2.51773934  
 C 6.20198567 1.95933918 0.95051248  
 C 5.68353263 3.56332765 2.62906761  
 C 6.64491309 2.92842228 1.85294208  
 H 6.93335902 1.44456541 0.32859640  
 H 5.99877407 4.32146376 3.34507833  
 C -2.47115687 -0.38943288 1.74746214  
 C -3.43011780 0.26742180 2.55360029  
 C -2.99531647 -1.29378734 0.79083641  
 C -4.80303189 0.03320263 2.40866478  
 C -4.36913802 -1.51830927 0.65703798  
 C -5.29736205 -0.85871278 1.46038013  
 H -5.50587982 0.55828060 3.05383061  
 H -4.72537245 -2.22484847 -0.09187018  
 H -1.19028473 1.17082197 -4.48292014  
 H 2.70259532 0.55065018 7.81263098  
 O 0.73335106 3.70200941 1.06928364  
 C 1.32633991 4.87998428 0.42115234  
 C -0.61061909 3.99959714 1.52244272  
 C 0.16881074 5.86443167 0.30002259  
 H 2.08009258 5.26374107 1.11599746  
 C 1.98336552 4.49443956 -0.88326280  
 C -0.71539777 5.51358267 1.49259338  
 H -1.32266301 3.52699009 0.83884370  
 H -0.36959138 5.69568579 -0.63907766

H 0.52048167 6.89809821 0.30981381  
 H 2.41375725 5.38827023 -1.34619264  
 H 2.79804563 3.78510401 -0.72162164  
 H 1.25912066 4.06332829 -1.57953721  
 H -1.74809656 5.84957768 1.38175713  
 H -0.31066528 5.94386917 2.41381131  
 O 0.63945984 -1.97359361 2.31014526  
 C 0.30193156 -2.89358587 3.40616139  
 C 1.97441041 -2.25141430 1.81673160  
 C 1.41853747 -3.93102832 3.38633486  
 H 0.35443823 -2.30340400 4.32848600  
 C -1.09009684 -3.45109270 3.22790706  
 C 2.61767858 -3.15253216 2.85570479  
 H 1.88658640 -2.74903061 0.84538410  
 H 1.15491384 -4.74619304 2.70346658  
 H 1.58440446 -4.35889070 4.37711046  
 H -1.32089635 -4.10982072 4.07146072  
 H -1.84160333 -2.65983186 3.19891319  
 H -1.16493660 -4.03582857 2.30716458  
 H 3.38902618 -3.78984511 2.41896003  
 H 3.07694965 -2.55657239 3.64905030  
 H -0.73573861 3.57170548 2.51806101  
 H 2.49653645 -1.30185547 1.68416364  
 C -3.00583968 1.23824220 3.63190246  
 H -2.55608597 0.72067887 4.48782436  
 H -2.26400116 1.95284304 3.26403976  
 H -3.85463659 1.81295445 4.01513332  
 C -2.07905150 -2.04098969 -0.15128918  
 H -1.85656016 -1.44665767 -1.04530961  
 H -1.12483152 -2.29106990 0.32109118  
 H -2.52861570 -2.97787601 -0.49591285  
 C -6.77463432 -1.09693902 1.29868218  
 H -7.13694063 -0.72301622 0.33400350  
 H -7.01680444 -2.16438288 1.33858643  
 H -7.34795913 -0.59527485 2.08279207  
 C 3.38487069 3.97775306 3.45402189  
 H 3.65259986 5.03605394 3.54814728  
 H 2.34464550 3.93084792 3.12189894  
 H 3.42082241 3.55511005 4.46527398  
 C 4.48076620 0.59696630 -0.20706855  
 H 3.74263087 -0.11379790 0.17511830  
 H 4.04875106 1.05351541 -1.10596794  
 H 5.35387890 0.02167751 -0.53026389  
 C 8.10737659 3.26138081 1.97571330  
 H 8.52310180 3.60175273 1.02085987  
 H 8.27631013 4.05174458 2.71186882  
 H 8.69237828 2.38807347 2.28547654

MeTHFBu\_Mg\_Mes2\_Mg\_BuMeTHF  
 100  
 E: -1958.40969197 ; H: -1957.478556 ; G: -  
 1957.619619 ; D: -0.20269607  
 C -1.98131488 -0.59095937 2.96457516  
 C -3.05103777 0.21379570 3.70870109  
 H -1.70706230 -1.44016160 3.61517027  
 H -2.46443159 -1.06790043 2.09150845



H 1.07547961 1.84248247 -1.73480138  
 Mg -0.28188269 0.05620849 1.65016871  
 Mg 1.77519432 2.01225216 1.29584199  
 C -4.92034251 0.26182568 1.31206296  
 H -5.02226999 -0.79207034 1.02014848  
 H -4.99312699 0.83836683 0.38017134  
 C 1.01039668 -0.05482709 -2.73504496  
 H 0.58459766 -1.05276883 -2.56480608  
 H 2.09828950 -0.19424428 -2.78111690  
 C 0.50722342 0.48924262 -4.06876411  
 H -0.58229772 0.60672026 -4.06462158  
 H 0.94248563 1.47078220 -4.28754499  
 C -6.06703182 0.64834895 2.24211210  
 H -6.01793451 1.70897902 2.51442098  
 H -6.03777013 0.07159693 3.17366529  
 H -7.04446036 0.47452565 1.77938138  
 H 0.76258245 -0.17501487 -4.90091639  
 C 3.80073444 2.85604641 1.44564827  
 C 4.80537433 2.64416952 0.46382748  
 C 4.18930573 3.65077534 2.54690213  
 C 6.08666088 3.18483796 0.58528741  
 C 5.48245968 4.18543136 2.65671894  
 C 6.45106929 3.96246875 1.68663974  
 H 6.82185698 2.99943009 -0.19679709  
 H 5.73448376 4.79565891 3.52372870  
 C 0.90274079 1.10404615 3.32059672  
 C 0.09304840 1.82423533 4.23259606  
 C 1.94624779 0.32658639 3.89948862  
 C 0.29744812 1.75270164 5.61548451  
 C 2.14075837 0.27534467 5.28001421  
 C 1.32048207 0.98314798 6.16051551  
 H -0.35484939 2.31313920 6.28278958  
 H 2.95206912 -0.32829096 5.68299867  
 O 0.65193270 3.68141045 0.51555162  
 C 1.15850337 5.05281411 0.40857756  
 C -0.71827300 3.67606159 0.07272976  
 C -0.09882422 5.94528791 0.38686314  
 H 1.75610863 5.20878667 1.30779887  
 C 2.03167019 5.20491319 -0.81906746  
 C -1.27644665 4.98533710 0.59365698  
 H -0.74823171 3.63302907 -1.02197026  
 H -1.19802308 2.78005645 0.46788170  
 H -0.17932339 6.44708443 -0.58168809  
 H -0.05385163 6.71925319 1.15546820  
 H 2.39137938 6.23697763 -0.88464864  
 H 2.90322020 4.55064884 -0.76082281  
 H 1.47287848 4.98457929 -1.73409306  
 H -2.17596884 5.29380146 0.05677556  
 H -1.52608184 4.89188332 1.65306071  
 O -0.00998000 -2.03715067 2.15751341  
 C -0.06766576 -2.62621119 3.50051282  
 C -0.01609251 -3.08128221 1.15457032  
 C -0.27913685 -4.11731435 3.25808435  
 H 0.91375797 -2.45026335 3.95233542  
 C -1.14217848 -1.95590224 4.32416530  
 C 0.36981096 -4.34708557 1.89722914

H -1.02119642 -3.15163874 0.72471160  
 H 0.68749773 -2.80579936 0.36705398  
 H -1.35082740 -4.34081455 3.21440926  
 H 0.16127749 -4.71871216 4.05598851  
 H -1.16417193 -2.40398596 5.32265051  
 H -0.94415899 -0.88865504 4.45056383  
 H -2.12593487 -2.08868065 3.86583990  
 H 0.01149618 -5.24528436 1.39038095  
 H 1.45759839 -4.41664540 1.99317077  
 C 3.23084625 3.98859764 3.66610999  
 H 3.60572665 3.64163646 4.63577064  
 H 3.08201380 5.07190072 3.75612456  
 H 2.25258405 3.52463443 3.52629833  
 C 4.52034663 1.80801283 -0.76266158  
 H 4.46930163 0.74009264 -0.51904652  
 H 3.56673439 2.07725820 -1.22772861  
 H 5.29947886 1.92514359 -1.52237229  
 C 7.84468567 4.51462361 1.81956505  
 H 8.55720983 3.73215168 2.10726214  
 H 8.20124602 4.94081626 0.87625743  
 H 7.89360139 5.29743791 2.58133123  
 C -1.00304299 2.73790154 3.74470265  
 H -1.86451726 2.73657201 4.41942244  
 H -0.64416646 3.77268899 3.68831021  
 H -1.35459550 2.45153478 2.75124160  
 C 2.91307346 -0.43939518 3.02766619  
 H 3.64709430 0.24155971 2.57789932  
 H 3.47738794 -1.17977529 3.60190232  
 H 2.40779534 -0.96136606 2.21051510  
 C 1.55204427 0.92521012 7.64494309  
 H 2.47706605 1.44523212 7.91866685  
 H 0.73335806 1.39408203 8.19633925  
 H 1.64940710 -0.10690194 7.99642165

MeTHFPh\_Mg\_Bu2\_Mg\_PhMeTHF

82

E: -1722.55705177 ; H: -1721.800616 ; G: -1721.926800 ; D: -0.18140678

C 0.83942619 0.38565898 -0.14717270  
 C 0.06906389 1.06994709 -1.28993119  
 H 0.60017875 -0.69457402 -0.19436907  
 H 1.91070363 0.36348595 -0.42037267  
 H -1.00519072 1.08340393 -1.06034254  
 H 0.36169556 2.12668765 -1.35694385  
 C 0.47466219 1.43512395 3.40214271  
 C 1.22996676 0.76849573 4.56506003  
 H -0.59933547 1.45492990 3.66262471  
 H 0.71216645 2.51628246 3.44003783  
 H 0.93991104 -0.28882534 4.64092464  
 H 2.30773796 0.75616478 4.35296375  
 Mg -0.26177516 -0.09246681 1.83319499  
 Mg 1.59360074 1.89034227 1.42242998  
 C 1.01519823 1.42094201 5.93454520  
 H 1.32858665 2.47192930 5.87968938  
 H -0.05992503 1.43764208 6.15716022  
 C 0.26059314 0.43194239 -2.66952759

|   |             |             |             |
|---|-------------|-------------|-------------|
| H | -0.05171195 | -0.61970301 | -2.62109165 |
| H | 1.33191850  | 0.41791067  | -2.91018783 |
| C | -0.50427701 | 1.13956465  | -3.78378830 |
| H | -1.58192479 | 1.14384144  | -3.58613383 |
| H | -0.18479314 | 2.18285240  | -3.88550862 |
| C | 1.76151484  | 0.72616169  | 7.06928111  |
| H | 1.43869898  | -0.31528767 | 7.17945430  |
| H | 2.84210656  | 0.71810748  | 6.88868853  |
| C | 3.72589247  | 2.21530191  | 1.58767489  |
| C | 4.62272891  | 1.81070018  | 0.57714182  |
| C | 4.33533329  | 2.82667435  | 2.70339726  |
| C | 6.00340716  | 1.99793839  | 0.66004425  |
| H | 4.24006009  | 1.32687925  | -0.32239485 |
| C | 5.71290951  | 3.02393732  | 2.80930727  |
| H | 3.71990742  | 3.16795567  | 3.53643170  |
| C | 6.55575785  | 2.60820801  | 1.78231918  |
| H | 6.64957250  | 1.66727883  | -0.14979551 |
| H | 6.13068040  | 3.49994726  | 3.69339373  |
| H | 7.62924774  | 2.75684211  | 1.85627454  |
| C | -2.39999570 | -0.40434543 | 1.78036641  |
| C | -3.23591285 | -0.04367534 | 2.85691293  |
| C | -3.07528508 | -0.95066110 | 0.66872183  |
| C | -4.62167247 | -0.21211801 | 2.83887330  |
| H | -2.79939944 | 0.39036820  | 3.75734177  |
| C | -4.45890713 | -1.12606018 | 0.62623902  |
| H | -2.50817265 | -1.25979298 | -0.20965878 |
| C | -5.24047867 | -0.75663502 | 1.71756126  |
| H | -5.21942976 | 0.08099303  | 3.69883021  |
| H | -4.92880646 | -1.55152353 | -0.25744891 |
| H | -6.31824049 | -0.89019514 | 1.69356989  |
| H | -0.35011702 | 0.65375186  | -4.75288601 |
| H | 1.59291585  | 1.22419026  | 8.02967581  |
| O | 0.66080323  | 3.71814772  | 0.91787904  |
| C | 1.34140711  | 5.01950616  | 0.83813930  |
| C | -0.76921728 | 3.91719876  | 1.00611360  |
| C | 0.22095186  | 6.05442836  | 0.97140674  |
| H | 2.01041118  | 5.05904846  | 1.70268481  |
| C | 2.14394026  | 5.11087326  | -0.43977194 |
| C | -0.91868709 | 5.28602163  | 1.63832420  |
| H | -1.19754064 | 3.88762882  | -0.00135706 |
| H | -0.08681663 | 6.40066595  | -0.02084085 |
| H | 0.54799922  | 6.92437650  | 1.54400119  |
| H | 2.64697782  | 6.08199929  | -0.48745472 |
| H | 2.91273423  | 4.33595858  | -0.47761625 |
| H | 1.49674992  | 5.01732353  | -1.31681453 |
| H | -1.90108145 | 5.72404848  | 1.45091022  |
| H | -0.77009016 | 5.22257882  | 2.72039491  |
| O | 0.78894777  | -1.87774380 | 2.30448855  |
| C | 0.27194147  | -3.08785890 | 2.95839991  |
| C | 2.23173717  | -1.94478703 | 2.20783694  |
| C | 1.51785280  | -3.90267467 | 3.31414049  |
| H | -0.23792129 | -2.74239787 | 3.86328501  |
| C | -0.70376579 | -3.80503126 | 2.05287506  |
| C | 2.64739740  | -2.87607403 | 3.32921193  |
| H | 2.50429404  | -2.34458535 | 1.22498914  |
| H | 1.69952433  | -4.65640402 | 2.54060000  |

|   |             |             |            |
|---|-------------|-------------|------------|
| H | 1.39555308  | -4.42309021 | 4.26606755 |
| H | -1.06057216 | -4.71258589 | 2.55076779 |
| H | -1.57141896 | -3.18263753 | 1.82576210 |
| H | -0.21978731 | -4.09735804 | 1.11608695 |
| H | 3.63099527  | -3.31661977 | 3.15464906 |
| H | 2.67666150  | -2.33636629 | 4.27964132 |
| H | -1.19011818 | 3.09907283  | 1.59274310 |
| H | 2.62731057  | -0.93194757 | 2.29882531 |

MeTHFBu\_Mg\_Ph2\_Mg\_BuMeTHF

82

E: -1722.55289545 ; H: -1721.796997 ; G: -1721.924349 ; D: -0.18042961

|    |             |             |             |
|----|-------------|-------------|-------------|
| C  | -1.97507390 | -0.71862923 | 2.92445849  |
| C  | -3.04856684 | 0.33879052  | 3.20759215  |
| H  | -1.80037347 | -1.28436314 | 3.85662771  |
| H  | -2.39971007 | -1.45934160 | 2.22488302  |
| H  | -2.66880775 | 1.07248144  | 3.93399189  |
| H  | -3.26134790 | 0.91470926  | 2.29369545  |
| C  | 3.81339219  | 1.63052468  | 0.53509107  |
| C  | 4.29085336  | 2.26651227  | -0.77738823 |
| H  | 4.06583844  | 0.55627884  | 0.50531473  |
| H  | 4.42865468  | 2.03299973  | 1.35890638  |
| H  | 3.68817152  | 1.89377480  | -1.61977988 |
| H  | 4.11153022  | 3.35224538  | -0.75300106 |
| Mg | -0.05551335 | -0.10796296 | 2.14103734  |
| Mg | 1.73173054  | 1.89050957  | 1.07801415  |
| C  | -4.38175169 | -0.20324250 | 3.73947710  |
| H  | -4.18987117 | -0.77287778 | 4.65863962  |
| H  | -4.78463733 | -0.92438451 | 3.01578942  |
| C  | 5.77012601  | 2.04477921  | -1.11889193 |
| H  | 6.38484504  | 2.42688842  | -0.29287416 |
| H  | 5.96419363  | 0.96465680  | -1.16295157 |
| C  | 6.21168849  | 2.69506727  | -2.42738016 |
| H  | 6.06388263  | 3.78097678  | -2.40261199 |
| H  | 5.63968919  | 2.30703312  | -3.27793743 |
| C  | -5.42285541 | 0.87764351  | 4.01710996  |
| H  | -5.66029663 | 1.44405431  | 3.10918584  |
| H  | -5.06319093 | 1.59432641  | 4.76454993  |
| C  | 0.10055233  | 0.67481470  | -0.04275543 |
| C  | 0.64316179  | -0.14429845 | -1.05605370 |
| C  | -1.13248169 | 1.28255985  | -0.36903321 |
| C  | 0.02085347  | -0.34453976 | -2.28806367 |
| H  | 1.59526760  | -0.64430402 | -0.88587961 |
| C  | -1.77549101 | 1.09312828  | -1.59216400 |
| H  | -1.62255512 | 1.92826676  | 0.35908346  |
| C  | -1.19577468 | 0.27567046  | -2.55835744 |
| H  | 0.48217620  | -0.98313812 | -3.03675366 |
| H  | -2.72704034 | 1.57898566  | -1.79158143 |
| H  | -1.68957537 | 0.12191170  | -3.51340526 |
| C  | 1.16735508  | 1.51905887  | 3.29644593  |
| C  | 0.18652121  | 2.33450918  | 3.90401207  |
| C  | 2.28604453  | 1.23745069  | 4.11103885  |
| C  | 0.29853343  | 2.82566448  | 5.20492328  |
| H  | -0.71453100 | 2.59466153  | 3.34929286  |
| C  | 2.41998430  | 1.71695535  | 5.41329211  |



|   |             |             |             |
|---|-------------|-------------|-------------|
| H | 3.09983659  | 0.63085706  | 3.71721504  |
| C | 1.42137750  | 2.51479573  | 5.96533953  |
| H | -0.48908882 | 3.44475235  | 5.62610883  |
| H | 3.30292683  | 1.47201022  | 5.99778404  |
| H | 1.51750276  | 2.88971249  | 6.98007311  |
| H | 7.27173154  | 2.51382251  | -2.63539736 |
| H | -6.36051674 | 0.45466886  | 4.39354555  |
| O | 1.12157150  | 3.88210592  | 0.64944865  |
| C | 1.07540733  | 5.04222114  | 1.54615395  |
| C | 0.84195237  | 4.29420857  | -0.70893215 |
| C | 0.68671808  | 6.21676700  | 0.64531334  |
| H | 0.27963766  | 4.82958488  | 2.26585791  |
| C | 2.39423753  | 5.20300358  | 2.26856108  |
| C | 0.01304254  | 5.55272847  | -0.55432153 |
| H | 1.78734773  | 4.49270998  | -1.22592604 |
| H | 0.32817208  | 3.47140086  | -1.20745197 |
| H | 1.58526197  | 6.75493331  | 0.32512010  |
| H | 0.03936893  | 6.92389066  | 1.16772108  |
| H | 2.33882015  | 6.06329654  | 2.94345213  |
| H | 2.62979290  | 4.32413066  | 2.87358969  |
| H | 3.21135981  | 5.37175985  | 1.56157636  |
| H | 0.02766060  | 6.17152116  | -1.45381843 |
| H | -1.02667703 | 5.29658535  | -0.32891040 |
| O | 1.13133026  | -1.87595784 | 2.15114112  |
| C | 0.61119827  | -3.17672272 | 2.59001531  |
| C | 2.56174384  | -1.96554476 | 2.00617299  |
| C | 1.85283871  | -3.98199996 | 3.00397451  |
| H | -0.02605398 | -2.95754731 | 3.44950124  |
| C | -0.20167937 | -3.81465615 | 1.48424454  |
| C | 2.97580206  | -2.94605802 | 3.08454324  |
| H | 2.80522427  | -2.34004570 | 1.00488346  |
| H | 2.97356620  | -0.96244921 | 2.11449083  |
| H | 2.08147685  | -4.72955078 | 2.23785981  |
| H | 1.69191424  | -4.50887859 | 3.94633740  |
| H | -0.59117034 | -4.77986223 | 1.82386548  |
| H | -1.05086481 | -3.18823102 | 1.20355247  |
| H | 0.41420174  | -3.98840560 | 0.59672070  |
| H | 3.96506268  | -3.37241571 | 2.90559713  |
| H | 2.98345931  | -2.45004332 | 4.05926330  |

MeTHFBu\_Mg\_PhBu\_Mg\_PhMeTHF

82

E: -1722.55496096 ; H: -1721.798066 ; G: -1721.921197 ; D: -0.18099071

|   |             |             |             |
|---|-------------|-------------|-------------|
| C | -2.42104870 | -0.63621366 | 1.60271943  |
| C | -3.46939875 | 0.46819777  | 1.41850191  |
| H | -2.67679892 | -1.19839371 | 2.51766840  |
| H | -2.54393087 | -1.36757400 | 0.78429398  |
| H | -3.40309068 | 1.19042108  | 2.24642888  |
| H | -3.25493770 | 1.04940396  | 0.50863431  |
| C | 0.73673716  | 0.52889588  | -0.25381486 |
| C | -0.25917249 | 1.06825423  | -1.29535534 |
| H | 0.74931016  | -0.57335269 | -0.34993306 |
| H | 1.75636741  | 0.77108939  | -0.60854736 |
| H | -1.28369393 | 0.79158201  | -1.00981414 |
| H | -0.24328536 | 2.16651893  | -1.29227579 |

|    |             |             |             |
|----|-------------|-------------|-------------|
| Mg | -0.31985474 | -0.14697200 | 1.69246027  |
| Mg | 1.48954958  | 1.97221299  | 1.37675255  |
| C  | -4.92386063 | -0.01267371 | 1.33462343  |
| H  | -5.16482936 | -0.57105380 | 2.24899592  |
| H  | -5.01137391 | -0.73242955 | 0.51000036  |
| C  | -0.01555152 | 0.59096617  | -2.73029784 |
| H  | -0.03872419 | -0.50666680 | -2.74798718 |
| H  | 1.00049849  | 0.87684270  | -3.03357655 |
| C  | -1.02263422 | 1.13825678  | -3.73724824 |
| H  | -2.04416677 | 0.83354391  | -3.48409299 |
| H  | -1.00459706 | 2.23378857  | -3.76301639 |
| C  | -5.93738615 | 1.11135608  | 1.13953327  |
| H  | -5.74692085 | 1.66323249  | 0.21178425  |
| H  | -5.89660700 | 1.83340575  | 1.96326903  |
| H  | -6.96331069 | 0.73129472  | 1.08875214  |
| H  | -0.81519898 | 0.78307514  | -4.75194935 |
| C  | 3.64173197  | 2.21818690  | 1.47192518  |
| C  | 4.49720347  | 1.83884174  | 0.41702790  |
| C  | 4.29718969  | 2.77685421  | 2.58901841  |
| C  | 5.88334221  | 2.00015540  | 0.46060762  |
| H  | 4.07585929  | 1.39541287  | -0.48631639 |
| C  | 5.68036437  | 2.95093737  | 2.65459831  |
| H  | 3.71214284  | 3.08880390  | 3.45480213  |
| C  | 6.48196298  | 2.56120518  | 1.58484202  |
| H  | 6.49712040  | 1.68879384  | -0.38157080 |
| H  | 6.13494695  | 3.38850762  | 3.54053011  |
| H  | 7.55967552  | 2.69080060  | 1.62791352  |
| C  | 0.46903410  | 1.31616305  | 3.34688138  |
| C  | -0.65321672 | 1.90837608  | 3.96645573  |
| C  | 1.49670309  | 0.92953447  | 4.23534505  |
| C  | -0.75126226 | 2.10085441  | 5.34419751  |
| H  | -1.50080795 | 2.22435801  | 3.36029765  |
| C  | 1.42190763  | 1.11479442  | 5.61563147  |
| H  | 2.40614644  | 0.48111229  | 3.83929506  |
| C  | 0.29164901  | 1.70263330  | 6.17530251  |
| H  | -1.64060016 | 2.55796336  | 5.76979525  |
| H  | 2.24523126  | 0.80439143  | 6.25355266  |
| H  | 0.22430659  | 1.84983560  | 7.24921724  |
| O  | 0.68895380  | 3.84537147  | 0.83123454  |
| C  | 1.50302861  | 5.06784389  | 0.73407937  |
| C  | -0.70613134 | 4.20674999  | 0.89717713  |
| C  | 0.51892601  | 6.21756902  | 0.98818564  |
| H  | 2.24047057  | 4.99040689  | 1.53639829  |
| C  | 2.20106782  | 5.12389722  | -0.60634858 |
| C  | -0.70710368 | 5.54468095  | 1.60703097  |
| H  | -1.10856865 | 4.28638285  | -0.11887460 |
| H  | -1.23471597 | 3.41165620  | 1.42264390  |
| H  | 0.24982377  | 6.69276073  | 0.03946280  |
| H  | 0.95726796  | 6.98211195  | 1.63217121  |
| H  | 2.79072684  | 6.04390940  | -0.67379355 |
| H  | 2.88362524  | 4.28043687  | -0.73070539 |
| H  | 1.47631927  | 5.12181598  | -1.42605805 |
| H  | -1.63114447 | 6.10294411  | 1.44222025  |
| H  | -0.57575439 | 5.39892812  | 2.68300859  |
| O  | 0.81702403  | -1.90792144 | 2.08730665  |
| C  | 0.39057392  | -2.99011574 | 2.98361422  |

C 2.23067546 -2.02835941 1.81069019  
 C 1.67662996 -3.74797516 3.32793828  
 H -0.01866203 -2.49583247 3.87014326  
 C -0.67062037 -3.83635311 2.31605448  
 C 2.79405792 -2.75498268 3.01514489  
 H 2.36558195 -2.60662481 0.88940914  
 H 2.63554383 -1.02678854 1.65836338  
 H 1.76562817 -4.63334605 2.68968442  
 H 1.67728611 -4.08243035 4.36710839  
 H -0.97789899 -4.63986688 2.99350104  
 H -1.55499994 -3.24683538 2.06777949  
 H -0.28345984 -4.29181936 1.39972878  
 H 3.74920454 -3.23693232 2.79700379  
 H 2.94154200 -2.05787789 3.84440383

MeTHFBu\_Mg\_BuMes\_Mg\_BuMeTHF  
 93

E: -1766.70206691 ; H: -1765.826789 ; G: -  
 1765.964773 ; D: -0.19943155

C -2.26047582 -0.31997977 1.96065664  
 C -3.22702377 0.85552449 2.15963062  
 H -2.39185636 -1.01269484 2.81074340  
 H -2.60314969 -0.89805626 1.08516229  
 H -2.93863356 1.43438337 3.05017412  
 H -3.14349796 1.56123551 1.31828033  
 C 0.95124158 0.56242102 -0.25510308  
 C -0.18245805 0.00101186 -1.13921228  
 H 1.80248365 -0.13499092 -0.32166882  
 H 1.32277632 1.45120031 -0.80017505  
 H -0.55267953 -0.95175855 -0.73232734  
 H -1.05452459 0.67051018 -1.11592973  
 Mg -0.14703056 0.09911093 1.73906760  
 Mg 1.79684167 2.03264868 1.33409615  
 C -4.70513185 0.47136326 2.30443630  
 H -4.80598565 -0.22644078 3.14634257  
 H -5.01293150 -0.08930665 1.41174292  
 C 0.20437964 -0.23783855 -2.60282586  
 H 1.06621345 -0.91680929 -2.63434642  
 H 0.55122712 0.70887556 -3.03765971  
 C -0.92939378 -0.80626691 -3.45064585  
 H -1.27234192 -1.77179555 -3.06244588  
 H -1.79424086 -0.13365905 -3.46315877  
 C -5.64327626 1.65718232 2.51071709  
 H -5.59331863 2.35839282 1.66954161  
 H -5.38605003 2.21704660 3.41732527  
 H -6.68679884 1.33872089 2.60800041  
 H -0.61864031 -0.96143022 -4.48902042  
 C 3.96726316 2.24334265 1.26717830  
 C 4.60898192 2.72567530 0.09709238  
 C 4.82113789 1.93148127 2.34685307  
 C 5.99388982 2.88398780 0.02675450  
 C 6.21219561 2.09011977 2.26103760  
 C 6.82104420 2.56924958 1.10723837  
 H 6.44436622 3.25821122 -0.89172321  
 H 6.83278769 1.83573132 3.11945414  
 C 0.55770410 1.72125512 3.25837224

H 1.26223743 2.54679455 3.48085854  
 H -0.40938601 2.24711771 3.16975436  
 C 0.50591149 0.86014060 4.53337773  
 H 1.45422545 0.32249188 4.66852451  
 H -0.25976184 0.07601870 4.42957871  
 C 0.20598308 1.63108832 5.82372693  
 H -0.74963650 2.15842141 5.70844896  
 H 0.96946757 2.40914248 5.95558120  
 C 0.15671626 0.74841770 7.06709276  
 H 1.10808549 0.22765023 7.22383881  
 H -0.04923122 1.33286663 7.96972894  
 H -0.62601947 -0.01393412 6.98469754  
 O 0.81590854 3.86695828 0.82563660  
 C 0.80507022 5.08819691 1.64318539  
 C -0.25045175 3.91165083 -0.15530900  
 C -0.21606589 5.99173103 0.96077495  
 H 0.43980170 4.78933349 2.63200493  
 C 2.19886132 5.66126219 1.75209820  
 C -1.18834222 5.00373722 0.32400548  
 H 0.18528406 4.15156391 -1.13126386  
 H -0.70879011 2.92332495 -0.20610695  
 H 0.27745711 6.59607939 0.19169800  
 H -0.69052794 6.66940182 1.67322555  
 H 2.17350586 6.55328446 2.38626125  
 H 2.89766218 4.95046732 2.19851184  
 H 2.58255634 5.94922760 0.76967926  
 H -1.76900229 5.43324780 -0.49473587  
 H -1.88520946 4.61003561 1.06966880  
 O 0.89928194 -1.72466414 2.14799842  
 C 0.32737221 -2.93090397 2.75601633  
 C 2.33538413 -1.85382401 2.06787928  
 C 1.53640570 -3.77371165 3.17827841  
 H -0.23132862 -2.58549986 3.63056396  
 C -0.60210791 -3.62395017 1.78394747  
 C 2.69633811 -2.78036340 3.21139949  
 H 2.60584764 -2.28446461 1.09711277  
 H 2.77137799 -0.85683625 2.14000542  
 H 1.72500679 -4.55068081 2.43001808  
 H 1.36476379 -4.26769276 4.13666697  
 H -1.00451437 -4.53116381 2.24665656  
 H -1.44400708 -2.98531841 1.51015361  
 H -0.06661074 -3.91427731 0.87500197  
 H 3.67029995 -3.25295196 3.06885787  
 H 2.71639803 -2.22873833 4.15560727  
 C 4.27241717 1.43413647 3.66445447  
 H 4.25763337 2.23013573 4.42013308  
 H 3.24809760 1.06968623 3.56230298  
 H 4.87978503 0.62065154 4.07656071  
 C 3.80234702 3.06191671 -1.13600214  
 H 2.87710017 3.58669773 -0.87884747  
 H 4.36252693 3.69985666 -1.82684009  
 H 3.52251733 2.15651892 -1.68784939  
 C 8.31142005 2.76072834 1.02325529  
 H 8.57793827 3.82439223 1.02449225  
 H 8.82281935 2.29330089 1.86905392  
 H 8.72186621 2.32962359 0.10420741

## MeTHFMes\_Mg\_Bu2\_Mg\_BuMeTHF

93

E: -1766.69971370 ; H: -1765.824706 ; G: -1765.961623 ; D: -0.20269607

|    |             |             |             |
|----|-------------|-------------|-------------|
| C  | -2.34833901 | -0.62948557 | 1.72297096  |
| C  | -3.21476966 | 0.15825921  | 0.73261969  |
| H  | -2.86618554 | -0.65752643 | 2.69725862  |
| H  | -2.33583329 | -1.68536907 | 1.39635691  |
| H  | -3.24046952 | 1.22361877  | 1.01000817  |
| H  | -2.75560969 | 0.13310953  | -0.26723616 |
| C  | 0.88607409  | 0.42305428  | 0.03846148  |
| C  | 0.57814388  | 1.20092022  | -1.25407579 |
| H  | 0.35632262  | -0.54283905 | -0.07806532 |
| H  | 1.94612304  | 0.11741863  | -0.00188234 |
| H  | -0.48309947 | 1.48287969  | -1.27672359 |
| H  | 1.13544383  | 2.15010580  | -1.27049483 |
| Mg | -0.26721441 | -0.08982706 | 2.00248426  |
| Mg | 1.50653849  | 2.08406193  | 1.53477762  |
| C  | -4.66624526 | -0.32078670 | 0.59667773  |
| H  | -5.14453388 | -0.28229741 | 1.58469357  |
| H  | -4.66425523 | -1.37959631 | 0.30487320  |
| C  | 0.90360195  | 0.44990669  | -2.54976650 |
| H  | 0.33976817  | -0.49222020 | -2.56229228 |
| H  | 1.96469498  | 0.16927998  | -2.54023345 |
| C  | 0.59629095  | 1.24493214  | -3.81501130 |
| H  | -0.46511371 | 1.51187050  | -3.86963709 |
| H  | 1.17242732  | 2.17638608  | -3.85009249 |
| C  | -5.49379423 | 0.48269897  | -0.40293794 |
| H  | -5.06377142 | 0.42923977  | -1.40967556 |
| H  | -5.53858472 | 1.54147911  | -0.12252082 |
| H  | -6.52444212 | 0.11745870  | -0.46718408 |
| H  | 0.83815404  | 0.67594432  | -4.71868773 |
| C  | 0.62452197  | 1.35092206  | 3.60574994  |
| C  | -0.44140994 | 2.02051719  | 4.26765823  |
| C  | 1.71611043  | 0.96989963  | 4.42944477  |
| C  | -0.40781850 | 2.28306834  | 5.63838080  |
| C  | 1.73175786  | 1.24163423  | 5.80246504  |
| C  | 0.67595394  | 1.89864609  | 6.42838151  |
| H  | -1.24911276 | 2.79244594  | 6.10573623  |
| H  | 2.58984285  | 0.93518765  | 6.39792525  |
| C  | 3.56491069  | 2.65581248  | 1.13890937  |
| H  | 3.51766473  | 3.53385007  | 0.47053118  |
| H  | 4.02174129  | 3.04725058  | 2.06440307  |
| C  | 4.52783418  | 1.63810659  | 0.51664875  |
| H  | 4.13507218  | 1.29507076  | -0.45212446 |
| H  | 4.58170830  | 0.73146895  | 1.13943203  |
| C  | 5.96160376  | 2.13732300  | 0.29362489  |
| H  | 5.92973288  | 3.03217983  | -0.34215635 |
| H  | 6.37396558  | 2.46810753  | 1.25641246  |
| C  | 6.89085106  | 1.10003079  | -0.33101515 |
| H  | 6.52478196  | 0.77744707  | -1.31253926 |
| H  | 7.90426385  | 1.49140677  | -0.47156118 |
| H  | 6.96958182  | 0.20568801  | 0.29796357  |
| O  | 0.71314700  | -1.95772336 | 2.47541441  |
| C  | 0.68926899  | -2.64697395 | 3.76997034  |

|   |             |             |             |
|---|-------------|-------------|-------------|
| C | 1.29024743  | -2.81708477 | 1.46089365  |
| C | 1.07506011  | -4.08444083 | 3.44184123  |
| H | 1.46951243  | -2.17923336 | 4.37977259  |
| C | -0.65486017 | -2.48332703 | 4.44095748  |
| C | 1.98276666  | -3.93061381 | 2.22617564  |
| H | 0.48185808  | -3.20344029 | 0.83062443  |
| H | 1.96351750  | -2.21812667 | 0.84660062  |
| H | 0.18022276  | -4.66124934 | 3.18352476  |
| H | 1.56187043  | -4.57167454 | 4.28915276  |
| H | -0.63623167 | -2.99912104 | 5.40645111  |
| H | -0.88480295 | -1.43343100 | 4.63662535  |
| H | -1.45580171 | -2.91377774 | 3.83479550  |
| H | 2.07145546  | -4.84186520 | 1.63127129  |
| H | 2.98698411  | -3.61969064 | 2.52999375  |
| O | 0.41075133  | 3.95774403  | 1.33002154  |
| C | 0.43799794  | 5.07114287  | 2.28476974  |
| C | -0.40764668 | 4.30209117  | 0.18445258  |
| C | -0.14723366 | 6.24361150  | 1.50886642  |
| H | -0.23436676 | 4.79168416  | 3.10306015  |
| C | 1.83306144  | 5.28725063  | 2.82119803  |
| C | -1.14750501 | 5.57053561  | 0.57501904  |
| H | 0.25198429  | 4.46899955  | -0.67285454 |
| H | -1.06671569 | 3.46075891  | -0.03506823 |
| H | 0.64158182  | 6.74279890  | 0.93535060  |
| H | -0.60272093 | 6.97863684  | 2.17571163  |
| H | 1.81617768  | 6.12432929  | 3.52662681  |
| H | 2.19940324  | 4.41216440  | 3.36197755  |
| H | 2.53573475  | 5.52240982  | 2.01829980  |
| H | -1.40468369 | 6.17626400  | -0.29634809 |
| H | -2.07196669 | 5.33013228  | 1.10845869  |
| C | -1.68305456 | 2.42514815  | 3.51070501  |
| H | -2.40233806 | 1.59996699  | 3.46816461  |
| H | -2.19120303 | 3.27029247  | 3.98535326  |
| H | -1.44828438 | 2.70010931  | 2.48023388  |
| C | 0.69487397  | 2.18995447  | 7.90360052  |
| H | 0.66111062  | 3.26782976  | 8.09629915  |
| H | -0.17112403 | 1.74772530  | 8.40767262  |
| H | 1.59641845  | 1.79546704  | 8.37845685  |
| C | 2.93271714  | 0.29410765  | 3.84229540  |
| H | 3.64032413  | 1.03562965  | 3.45495424  |
| H | 3.46700082  | -0.29803741 | 4.59156171  |
| H | 2.66906357  | -0.36550767 | 3.01184120  |

## MeTHFBu\_Mg\_Bu2\_Mg\_PhMeTHF

84

E: -1648.77158812 ; H: -1647.983666 ; G: -1648.111688 ; D: -0.1741955

|   |             |             |             |
|---|-------------|-------------|-------------|
| C | -2.38103051 | -0.51677275 | 2.16931258  |
| C | -3.35630123 | 0.64108174  | 2.42262663  |
| H | -2.48622519 | -1.23880714 | 2.99849028  |
| H | -2.72690455 | -1.07052433 | 1.27926972  |
| H | -3.05623258 | 1.19745600  | 3.32394317  |
| H | -3.29784621 | 1.37292378  | 1.60221305  |
| C | 0.57875533  | 0.50811630  | -0.15385582 |
| C | -0.45974316 | 1.09786795  | -1.12295306 |
| H | 0.47360477  | -0.59266436 | -0.19079396 |

H 1.57598617 0.62969406 -0.61777410  
 H -1.47175330 0.97227172 -0.71259077  
 H -0.31477668 2.18372644 -1.20926629  
 Mg -0.28590108 -0.05131755 1.93783272  
 Mg 1.57668021 1.90725406 1.38134225  
 C -4.82679169 0.23641256 2.58604324  
 H -4.90628187 -0.47609515 3.41781715  
 H -5.14282867 -0.31277002 1.68915089  
 C -0.44020773 0.49945210 -2.53332884  
 H -0.60382137 -0.58362815 -2.45894694  
 H 0.56399618 0.62434564 -2.95990644  
 C -1.47596692 1.10799155 -3.47362437  
 H -2.49230480 0.97051519 -3.08812928  
 H -1.31602053 2.18485541 -3.59983332  
 C -5.77355621 1.40893295 2.82617030  
 H -5.74415996 2.12257763 1.99464438  
 H -5.50644583 1.95803791 3.73644105  
 H -6.81194630 1.07820970 2.93624425  
 H -1.43742123 0.65286113 -4.46863340  
 C 3.74056454 2.02666245 1.34243947  
 C 4.53691957 1.37018767 0.38170888  
 C 4.46502069 2.78200258 2.28874615  
 C 5.93005208 1.45685066 0.35412958  
 H 4.06092286 0.75950398 -0.38671328  
 C 5.85676765 2.88296100 2.28249555  
 H 3.93106999 3.31984063 3.07309299  
 C 6.59774190 2.21785138 1.30917806  
 H 6.49578715 0.93052948 -0.41131084  
 H 6.36532890 3.47845774 3.03720116  
 H 7.68152499 2.29047050 1.29652963  
 C 0.63033456 1.47318501 3.43411387  
 H 0.91165406 2.54306443 3.48221326  
 H -0.42478884 1.51912198 3.75988053  
 C 1.43646196 0.75664353 4.53158410  
 H 2.49874077 0.72753607 4.25318752  
 H 1.12552721 -0.29550329 4.60048915  
 C 1.31949380 1.37863439 5.92693158  
 H 0.26070728 1.40650939 6.21645707  
 H 1.64683682 2.42555831 5.87629489  
 C 2.12336595 0.64505677 6.99617842  
 H 3.19127398 0.63094144 6.75158365  
 H 2.01737856 1.11816193 7.97795927  
 H 1.79523105 -0.39571242 7.09710206  
 O 0.93519893 3.86481652 0.85564872  
 C -0.41166658 4.44838370 0.85835333  
 C 1.82930297 4.72176654 0.10475824  
 C -0.33787275 5.62480968 -0.12500964  
 H -1.07199565 3.66458720 0.47788579  
 C -0.82359099 4.84087184 2.26076215  
 C 0.93489851 5.36965467 -0.93102365  
 H 2.27159355 5.45964092 0.78361969  
 H 2.62750075 4.09824265 -0.29751159  
 H -0.25052205 6.56534049 0.42868712  
 H -1.23499108 5.68439732 -0.74411799  
 H -1.81460573 5.30530647 2.23098081  
 H -0.88152229 3.97554017 2.92362787

H -0.12164137 5.56352536 2.68739506  
 H 1.37097861 6.28245081 -1.34249381  
 H 0.74872741 4.67570899 -1.75581432  
 O 0.86266167 -1.83505108 2.20372198  
 C 0.41138476 -3.14759913 2.67703023  
 C 2.29804159 -1.84064254 2.02571426  
 C 1.69424889 -3.96755436 2.84059961  
 H -0.06008657 -2.97061939 3.64888922  
 C -0.59128256 -3.73967836 1.71138973  
 C 2.79402973 -2.91592830 2.97085726  
 H 2.52842839 -2.08176267 0.98191797  
 H 2.67269200 -0.84020934 2.24742037  
 H 1.85980962 -4.57774927 1.94646119  
 H 1.63350695 -4.63918973 3.69921252  
 H -0.90746073 -4.72499217 2.06917560  
 H -1.48060257 -3.11234767 1.62444609  
 H -0.14744222 -3.86272060 0.71883262  
 H 3.78148545 -3.28735628 2.68989558  
 H 2.84928925 -2.52830414 3.99196931

MeTHFBu\_Mg\_PhBu\_Mg\_BuMeTHF

84

E: -1648.76908148 ; H: -1647.981224 ; G: -1648.109085 ; D: -0.17465063

C -2.34920755 -0.56261182 1.62272377  
 C -3.30702161 0.24270194 0.73621794  
 H -2.75660030 -0.58330214 2.64823920  
 H -2.38755788 -1.61771117 1.29605500  
 H -3.32228988 1.29709592 1.05373647  
 H -2.93612988 0.26079764 -0.29953738  
 C 0.86970780 0.56198969 -0.19611011  
 C 0.42437498 1.46605865 -1.36099604  
 H 0.37969272 -0.41517661 -0.37417505  
 H 1.93585289 0.31578830 -0.34737842  
 H -0.64306171 1.70346428 -1.26168702  
 H 0.94232560 2.43568850 -1.31102427  
 Mg -0.24297355 -0.07908471 1.75150778  
 Mg 1.56917937 2.05134895 1.41862011  
 C -4.75768615 -0.25633805 0.70980274  
 H -5.14745503 -0.26322600 1.73643861  
 H -4.76465030 -1.30353768 0.37901202  
 C 0.65887058 0.88022150 -2.75734422  
 H 0.12602209 -0.07685670 -2.83351745  
 H 1.72501886 0.64408580 -2.86923294  
 C 0.21704411 1.80021809 -3.89124104  
 H -0.85298476 2.02764321 -3.82605680  
 H 0.75812300 2.75272456 -3.86542293  
 C -5.68307350 0.56670157 -0.18235117  
 H -5.34313230 0.55895395 -1.22433573  
 H -5.72104247 1.61341046 0.14104000  
 H -6.70910719 0.18370540 -0.16987187  
 H 0.39620671 1.34831064 -4.87233208  
 C 0.58895972 1.29373442 3.41332402  
 C -0.49137664 1.89682806 4.09336713  
 C 1.70826152 1.00403350 4.22371113  
 C -0.46821763 2.18582433 5.45730294

H -1.40129703 2.13987589 3.54626281  
 C 1.75807129 1.29238312 5.58800948  
 H 2.58778653 0.54160865 3.77735925  
 C 0.66381032 1.88533209 6.21016162  
 H -1.33135287 2.64306525 5.93409276  
 H 2.64863276 1.05595455 6.16441920  
 H 0.69204257 2.11110792 7.27214222  
 C 3.67721960 2.51828694 1.32133409  
 H 3.86255743 2.98750341 0.33878356  
 H 3.92057534 3.30523988 2.05594790  
 C 4.68633023 1.37540384 1.49187361  
 H 4.48299259 0.57806862 0.76008855  
 H 4.55959683 0.90169273 2.47737987  
 C 6.16066081 1.77575489 1.35299169  
 H 6.31116362 2.23400916 0.36644822  
 H 6.38189736 2.56204161 2.08686104  
 C 7.13844672 0.61820766 1.53380035  
 H 6.96970359 -0.16670027 0.78737687  
 H 8.17961905 0.94401967 1.43623370  
 H 7.03079285 0.15712848 2.52248698  
 O 0.84135059 -1.88376137 2.15023654  
 C 0.95968330 -2.54336933 3.45493218  
 C 1.40508392 -2.72065964 1.11007393  
 C 1.40742396 -3.96113769 3.12121600  
 H 1.75274947 -2.01518397 3.99519269  
 C -0.34020982 -2.43997719 4.21825750  
 C 2.21686479 -3.77445172 1.84183834  
 H 0.58323439 -3.16726286 0.53961372  
 H 1.99812182 -2.08915316 0.44770205  
 H 0.53290658 -4.59419340 2.93475694  
 H 1.98143494 -4.40361662 3.93790184  
 H -0.22937366 -2.93666085 5.18749510  
 H -0.61195042 -1.39986003 4.41437451  
 H -1.15630892 -2.92231312 3.67382128  
 H 2.32183739 -4.68981576 1.25591959  
 H 3.21776901 -3.39572417 2.06986190  
 O 0.46248523 3.85461398 1.14500358  
 C 0.92959392 5.17748702 1.58267567  
 C -0.96452863 3.88623802 0.92895005  
 C -0.33805156 6.03113696 1.67487904  
 H 1.36524138 5.02552045 2.57513020  
 C 1.97183565 5.71005888 0.62541056  
 C -1.46420943 5.00986749 1.81509381  
 H -1.16078094 4.08986386 -0.12928390  
 H -1.36694911 2.90284857 1.17763458  
 H -0.46375676 6.60958181 0.75340958  
 H -0.28652979 6.73374410 2.50893378  
 H 2.29994333 6.70062123 0.95706993  
 H 2.84799408 5.06069192 0.58595756  
 H 1.55828207 5.80669486 -0.38298825  
 H -2.43485252 5.39084138 1.49088235  
 H -1.55277472 4.66853263 2.85003345

SiFlu2\_EE\_adduct  
 71

E: -1354.07472335 ; H: -1353.45976 ; G: -  
 1353.566357 ; D: -0.20824444  
 C -1.31890119 0.93319698 -2.05598351  
 C -0.56707655 0.06260996 -2.92116143  
 C 0.81941207 0.42210924 -2.78771400  
 C 0.88943724 1.52472291 -1.85776929  
 C -0.42617150 1.82156454 -1.34077864  
 Nd 0.13123741 -0.46521656 -0.01904222  
 C -1.54329667 0.57792184 2.06575438  
 C -0.88988094 -0.37935984 2.92024543  
 C 0.48295320 0.03098896 3.04924703  
 C 0.64830774 1.23219581 2.26813455  
 C -0.59189699 1.56936757 1.60420013  
 C -1.34542940 -2.48569040 -0.23955772  
 C -0.75462126 -3.89929027 -0.33607727  
 C 2.91771354 -2.65596791 0.46592788  
 C 3.42839160 -1.43246788 0.33392161  
 H -1.97252604 -2.42385466 0.66565221  
 H -2.04089499 -2.32926286 -1.07959228  
 H -0.02848879 -4.07568229 0.47437726  
 H -1.53085109 -4.66808440 -0.18332136  
 C -0.07398241 -4.19910066 -1.67271054  
 H 3.55481899 -0.77439862 1.19007492  
 H 3.77616848 -1.06253718 -0.62712182  
 H 2.83082110 -3.33289089 -0.37907181  
 H 2.60666648 -3.04054318 1.43365248  
 C 0.47236501 -5.61912761 -1.78339520  
 H -0.79549905 -4.02250153 -2.47971923  
 H 0.73993452 -3.47937974 -1.84530888  
 H 0.96741722 -5.78985476 -2.74514064  
 H 1.20125044 -5.83516588 -0.99396113  
 H -0.33111711 -6.35801714 -1.69300043  
 Si -0.83902248 2.83367989 0.21131128  
 C 0.25901001 4.36731733 0.39680525  
 H 1.33464831 4.19260058 0.42081053  
 H 0.05621142 5.04493706 -0.43998805  
 H -0.00983782 4.88793634 1.32228373  
 C -2.58771960 3.56020054 0.17480280  
 H -2.74171444 4.15188137 1.08377014  
 H -2.67603647 4.23497716 -0.68369748  
 H -3.40470322 2.84163932 0.11186612  
 C 1.92327381 1.85237258 2.27496199  
 C 2.94525995 1.32727952 3.04049076  
 H 2.08999177 2.76643687 1.71909026  
 H 3.90711477 1.83098980 3.05929043  
 C 1.54244003 -0.48421243 3.81795183  
 C 2.76299637 0.16144896 3.81410313  
 H 1.39307597 -1.37043188 4.42809239  
 H 3.58188276 -0.21678524 4.41722887  
 C -2.92536925 0.39625477 1.81195151  
 C -3.60331447 -0.65292713 2.39746210  
 H -3.46572917 1.09238136 1.18332756  
 H -4.66532546 -0.77013446 2.20538078  
 C -1.60339930 -1.43998536 3.50330206  
 C -2.95165751 -1.57347148 3.24248750  
 H -1.09981091 -2.14116218 4.16239979

H -3.51598865 -2.38448964 3.69040079  
C -1.21423614 -0.87470695 -3.74610479  
C -2.58913236 -0.97029304 -3.71192660  
H -0.63664807 -1.50714214 -4.41358576  
H -3.10147159 -1.68387215 -4.34855168  
C -2.72882581 0.79378990 -2.04039410  
C -3.33803664 -0.13507051 -2.85685215  
H -3.33538679 1.44247498 -1.42126459  
H -4.42042114 -0.21921988 -2.84973589  
C 2.16882575 2.07886619 -1.59236691  
C 3.28440102 1.59024821 -2.24160418  
H 2.27208029 2.91817118 -0.91621515  
H 4.25092178 2.04624103 -2.04952099  
C 1.97484877 -0.05614858 -3.43601452  
C 3.19619014 0.52573784 -3.16507396  
H 1.89944667 -0.86256634 -4.15973205  
H 4.09063196 0.17678109 -3.67058291

SiFlu2\_EE\_product

71

E: -1354.11171496 ; H: -1353.4930000 ; G: -1353.59701 ; D: -0.20317239

C -1.43604701 1.51382851 -1.93209781  
C -0.76509998 0.67903504 -2.90034066  
C 0.63470908 1.00301790 -2.84683211  
C 0.80400638 2.00501579 -1.82756986  
C -0.47108625 2.31430409 -1.21079874  
Nd -0.14645556 -0.08287766 -0.02668911  
C -1.65540542 0.97068285 2.09308477  
C -1.07257370 -0.16526998 2.76727867  
C 0.33598198 0.09559708 2.90353409  
C 0.59568405 1.37079746 2.28234740  
C -0.62533445 1.91414213 1.72390329  
C 0.47031831 -3.53369668 -0.82011688  
C 0.09033383 -5.01135915 -0.68551955  
C 1.57599230 -3.03507409 0.11637838  
C 1.90676945 -1.54847594 -0.08520103  
H -0.44450428 -2.93919101 -0.64496652  
H 0.76005616 -3.32822304 -1.86008944  
H -0.15617629 -5.22896533 0.36284362  
H -0.82886771 -5.19657688 -1.25683951  
C 1.16160279 -5.99186310 -1.16473731  
H 2.63497141 -1.22149586 0.67145941  
H 2.41054767 -1.41427563 -1.05683052  
H 2.46251801 -3.67299840 -0.02037817  
H 1.25361253 -3.21273506 1.15376046  
C 0.71004096 -7.44636653 -1.08432691  
H 1.43014489 -5.75018183 -2.20127733  
H 2.07600542 -5.86365728 -0.57538740  
H 1.49111120 -8.12876926 -1.43374709  
H 0.46110094 -7.73020185 -0.05597721  
H -0.18007456 -7.62190999 -1.69854385  
Si -0.76610575 3.27361924 0.40219340  
C 0.47371488 4.67926786 0.66142425  
H 1.52312224 4.39066027 0.71300308  
H 0.37192860 5.40127863 -0.15609585

H 0.23065923 5.19652267 1.59605259  
C -2.43893319 4.16188498 0.42553644  
H -2.57297131 4.65274863 1.39565718  
H -2.42817859 4.94056234 -0.34510660  
H -3.31732541 3.54174878 0.24600078  
C 1.92955344 1.85167123 2.30096942  
C 2.91592779 1.12383080 2.93215808  
H 2.17302128 2.81098040 1.86240741  
H 3.92819955 1.51519833 2.95771560  
C 1.36194276 -0.62451201 3.54205595  
C 2.64067515 -0.11059055 3.55672037  
H 1.14403301 -1.56939447 4.03094838  
H 3.43976740 -0.65117737 4.05259131  
C -3.05839812 0.96092067 1.87947952  
C -3.81776269 -0.10526908 2.31425207  
H -3.54384387 1.80692868 1.40887680  
H -4.89255103 -0.08894793 2.16109345  
C -1.87380648 -1.23993289 3.20336770  
C -3.23300522 -1.21023925 2.97199860  
H -1.42428660 -2.07596624 3.73114558  
H -3.86158456 -2.02726095 3.31043515  
C -1.48674390 -0.21784086 -3.70993296  
C -2.85491156 -0.32252340 -3.55814371  
H -0.97042619 -0.81543664 -4.45560065  
H -3.42188176 -1.00583245 -4.18160630  
C -2.84040127 1.36397194 -1.79957642  
C -3.52296881 0.46854823 -2.60008744  
H -3.39153606 1.97259052 -1.09388779  
H -4.60058671 0.38250013 -2.49930418  
C 2.11428634 2.48841562 -1.58972987  
C 3.16986297 2.01942589 -2.34432471  
H 2.29036209 3.25301838 -0.84379492  
H 4.16637700 2.41020508 -2.16230149  
C 1.72666976 0.54480092 -3.60354179  
C 2.98453814 1.05223536 -3.35284052  
H 1.57925207 -0.19578261 -4.38409695  
H 3.83555612 0.71151509 -3.93303272

SiFlu2\_EE\_TS

71

E: -1354.06555719 ; H: -1353.448510 ; G: -1353.551091 ; D:

C -0.85717569 0.48915675 -1.99598365  
C -0.07882312 -0.35009453 -2.87398560  
C 1.29869164 0.03174594 -2.71890825  
C 1.33892693 1.10592906 -1.75677696  
C 0.01068033 1.37438479 -1.25134858  
Nd 0.53205667 -0.97657634 0.01124311  
C -1.10978054 0.03581631 2.12595982  
C -0.42723351 -0.98647234 2.88220922  
C 0.95157457 -0.59407764 2.98378765  
C 1.09381139 0.65762093 2.28019226  
C -0.17078940 1.04848509 1.69560916  
C -0.39109980 -3.32535992 -0.39486900  
C -0.59840634 -4.82379503 -0.49123428  
C 1.90180329 -3.49660418 -0.18930206



|   |             |             |            |
|---|-------------|-------------|------------|
| H | 2.30644359  | -3.86066984 | 0.00000000 |
| H | 0.98275205  | -4.33494022 | 0.00000000 |
| C | 1.18030050  | -1.20309775 | 0.00000000 |
| H | 2.18172494  | -1.52091537 | 0.00000000 |
| H | 0.45885682  | -1.64868912 | 0.00000000 |
| H | 1.13796340  | -0.12059445 | 0.00000000 |
| C | -1.84069236 | 2.64869739  | 0.00000000 |
| C | -1.98666285 | 4.04070743  | 0.00000000 |
| H | -2.93028773 | 4.47896035  | 0.00000000 |
| C | -0.94827773 | 4.87814491  | 0.00000000 |
| C | 0.22041426  | 4.28217057  | 0.00000000 |
| C | 0.38346899  | 2.89769989  | 0.00000000 |
| H | 1.02260819  | 4.91723810  | 0.00000000 |
| C | 1.61689364  | 2.35208507  | 0.00000000 |
| H | 2.47526372  | 3.01770361  | 0.00000000 |
| H | 1.44243592  | 2.25123456  | 0.00000000 |
| H | 1.91434340  | 1.36622637  | 0.00000000 |
| C | -3.05956936 | 1.82206664  | 0.00000000 |
| H | -3.82161886 | 1.92962030  | 0.00000000 |
| H | -3.52499575 | 2.11634650  | 0.00000000 |
| H | -2.83597072 | 0.75167373  | 0.00000000 |
| C | -1.07543078 | 6.37413890  | 0.00000000 |
| H | -0.90940855 | 6.84012489  | 0.00000000 |
| H | -0.33586986 | 6.79951175  | 0.00000000 |
| H | -2.06584453 | 6.67552404  | 0.00000000 |

SiFlu2\_MesE\_product

78

E: -1545.82582223 ; H: -1545.150592 ; G: -1545.260801 ; D: -0.24122375

|    |             |             |            |
|----|-------------|-------------|------------|
| C  | 1.97579299  | -1.00740090 | 0.00000000 |
| C  | 2.36686292  | 0.38724420  | 0.00000000 |
| C  | 3.26103715  | 0.66482579  | 0.00000000 |
| C  | 3.44003613  | -0.56190975 | 0.00000000 |
| C  | -1.86462946 | -0.59612755 | 0.00000000 |
| C  | -0.88965960 | -1.54936414 | 0.00000000 |
| C  | -1.60866400 | -2.35372099 | 0.00000000 |
| C  | -2.96639908 | -1.89147535 | 0.00000000 |
| C  | -3.12990459 | -0.80291954 | 0.00000000 |
| Si | 0.87752360  | -1.86341869 | 0.00000000 |
| C  | 4.19354831  | -0.86168182 | 0.00000000 |
| H  | 4.77781313  | -0.08777851 | 0.00000000 |
| C  | 2.70298467  | -2.88667196 | 0.00000000 |
| H  | 2.16306467  | -3.69006205 | 0.00000000 |
| C  | 4.19514527  | -2.15378112 | 0.00000000 |
| H  | 4.77719570  | -2.39799537 | 0.00000000 |
| C  | 3.45222837  | -3.15863382 | 0.00000000 |
| H  | 3.47366823  | -4.17091808 | 0.00000000 |
| C  | 1.97870436  | 1.47070260  | 0.00000000 |
| H  | 1.29323762  | 1.32170387  | 0.00000000 |
| C  | 3.80564104  | 1.94292950  | 0.00000000 |
| H  | 4.51618767  | 2.12639899  | 0.00000000 |
| C  | 3.43724044  | 2.96936494  | 0.00000000 |
| H  | 3.85733609  | 3.96157458  | 0.00000000 |
| C  | 2.51258251  | 2.73111984  | 0.00000000 |
| H  | 2.22123699  | 3.54765095  | 0.00000000 |

|   |             |             |            |
|---|-------------|-------------|------------|
| C | -4.24613199 | -0.02435786 | 0.00000000 |
| H | -5.20267730 | -0.20560422 | 0.00000000 |
| C | -1.77165821 | 0.44062476  | 0.00000000 |
| H | -0.84050742 | 0.62278017  | 0.00000000 |
| C | -4.12441480 | 0.97276513  | 0.00000000 |
| H | -4.98498597 | 1.57570611  | 0.00000000 |
| C | -2.88604730 | 1.20198972  | 0.00000000 |
| H | -2.80622116 | 1.98356843  | 0.00000000 |
| C | -3.85990964 | -2.50715356 | 0.00000000 |
| H | -4.88863320 | -2.16430704 | 0.00000000 |
| C | -3.42795510 | -3.56669397 | 0.00000000 |
| H | -4.11673484 | -4.05489794 | 0.00000000 |
| C | -1.19557641 | -3.42111147 | 0.00000000 |
| H | -0.18073233 | -3.79942808 | 0.00000000 |
| C | -2.09959029 | -4.01449100 | 0.00000000 |
| H | -1.77438899 | -4.84239815 | 0.00000000 |
| C | -0.93996509 | 0.43683692  | 0.00000000 |
| C | -0.64570837 | -0.94688695 | 0.00000000 |
| H | -0.30907639 | 0.83525871  | 0.00000000 |
| H | -1.98830470 | 0.63496996  | 0.00000000 |
| H | -1.50089824 | -1.62080062 | 0.00000000 |
| H | 0.22746423  | -1.40757244 | 0.00000000 |
| C | 1.24954406  | -3.71380361 | 0.00000000 |
| H | 0.68034819  | -4.09623443 | 0.00000000 |
| H | 2.31350333  | -3.86018823 | 0.00000000 |
| H | 0.98792663  | -4.33303637 | 0.00000000 |
| C | 1.18579596  | -1.19948716 | 0.00000000 |
| H | 2.18828920  | -1.51491423 | 0.00000000 |
| H | 0.46609069  | -1.64547394 | 0.00000000 |
| H | 1.14164625  | -0.11689339 | 0.00000000 |
| C | -1.87445034 | 2.55995111  | 0.00000000 |
| C | -1.96019460 | 3.95284910  | 0.00000000 |
| H | -2.87891790 | 4.37839737  | 0.00000000 |
| C | -0.92501791 | 4.79998147  | 0.00000000 |
| C | 0.23912434  | 4.20175316  | 0.00000000 |
| C | 0.35926848  | 2.81943750  | 0.00000000 |
| H | 1.07413355  | 4.83222961  | 0.00000000 |
| C | 1.60464445  | 2.30296030  | 0.00000000 |
| H | 2.45694805  | 2.95423402  | 0.00000000 |
| H | 1.47025222  | 2.27239133  | 0.00000000 |
| H | 1.87888318  | 1.29251427  | 0.00000000 |
| C | -3.09659972 | 1.75640921  | 0.00000000 |
| H | -3.86647012 | 1.86073344  | 0.00000000 |
| H | -3.53824627 | 2.08498227  | 0.00000000 |
| H | -2.88820184 | 0.68557982  | 0.00000000 |
| C | -1.04595280 | 6.29708400  | 0.00000000 |
| H | -0.91136840 | 6.76611168  | 0.00000000 |
| H | -0.28126293 | 6.71432663  | 0.00000000 |
| H | -2.02368893 | 6.59666837  | 0.00000000 |

SiFlu2\_MesE\_TS

78

E: -1545.769300 ; H: -1545.096535 ; G: -1545.205782 ; D: -0.24064059

|    |           |           |           |
|----|-----------|-----------|-----------|
| Nd | -0.601925 | -0.182476 | -0.384755 |
| C  | 0.769007  | -0.747979 | 1.763962  |



C -0.912578 2.583358 -1.809154  
 C -2.050850 1.887908 -1.239098  
 C -2.069393 2.278944 0.156038  
 C -0.976883 3.173820 0.432217  
 C -0.244562 3.350732 -0.794508  
 C -3.221441 -1.953375 -0.826584  
 C -2.732933 -0.977706 -1.778796  
 C -1.762261 -1.694774 -2.582289  
 C -1.646662 -3.054622 -2.121645  
 C -2.574914 -3.218754 -1.034393  
 Si -3.332007 0.789980 -2.094427  
 C 0.898882 4.103940 -1.096449  
 H 1.389566 4.688456 -0.323417  
 C -0.384201 2.612071 -3.120148  
 H -0.874955 2.075149 -3.923758  
 C 1.392900 4.104865 -2.389082  
 H 2.275011 4.687273 -2.634486  
 C 0.746200 3.361572 -3.393416  
 H 1.136140 3.384759 -4.406633  
 C -2.895318 1.890433 1.239693  
 H -3.721867 1.204853 1.091963  
 C -0.798728 3.719233 1.709532  
 H 0.003192 4.428370 1.892891  
 C -1.650760 3.350914 2.736113  
 H -1.520753 3.768985 3.728728  
 C -2.680895 2.425084 2.499422  
 H -3.331789 2.132048 3.317442  
 C -2.907206 -4.335131 -0.256641  
 H -2.425196 -5.291806 -0.437202  
 C -4.178077 -1.859169 0.209839  
 H -4.700253 -0.927236 0.393323  
 C -3.859439 -4.212505 0.740262  
 H -4.130570 -5.072291 1.344289  
 C -4.484254 -2.973424 0.970568  
 H -5.232389 -2.892756 1.753657  
 C -0.764703 -3.948310 -2.740651  
 H -0.700531 -4.977731 -2.399819  
 C 0.016048 -3.516774 -3.801955  
 H 0.693835 -4.207045 -4.293396  
 C -0.932316 -1.282118 -3.652165  
 H -0.984491 -0.269368 -4.035888  
 C -0.069896 -2.187973 -4.249031  
 H 0.547545 -1.864784 -5.081453  
 C 2.234321 -1.054006 -0.022891  
 C 1.825693 -0.783812 -1.308779  
 H 2.852836 -0.348440 0.516250  
 H 2.300036 -2.077897 0.325428  
 H 1.532660 -1.590510 -1.976952  
 H 2.068088 0.169811 -1.775336  
 C -3.498979 1.162607 -3.944502  
 H -4.356281 0.595846 -4.324606  
 H -3.711555 2.227133 -4.088811  
 H -2.643827 0.900254 -4.567403  
 C -5.077490 1.100150 -1.428161  
 H -5.386391 2.103338 -1.742705  
 H -5.774432 0.381916 -1.872619

H -5.195137 1.056371 -0.345341  
 C 0.350277 -1.950779 2.370655  
 C 0.283130 -2.068509 3.763717  
 H -0.068511 -3.000136 4.202752  
 C 0.664855 -1.024657 4.599857  
 C 1.158744 0.139213 4.005139  
 C 1.236301 0.280274 2.620514  
 H 1.500897 0.953505 4.641292  
 C 1.920075 1.511512 2.081750  
 H 1.760193 2.375847 2.729767  
 H 3.004958 1.350702 2.028721  
 H 1.593335 1.787873 1.076504  
 C 0.021754 -3.171890 1.549579  
 H 0.810534 -3.927613 1.647909  
 H -0.914218 -3.641701 1.862042  
 H -0.056814 -2.951538 0.480392  
 C 0.574758 -1.143578 6.095575  
 H 1.554256 -1.008266 6.566875  
 H -0.090214 -0.379984 6.513346  
 H 0.191634 -2.121387 6.396901

SiFlu2\_BuMes\_Mg\_BuBu\_Mg\_MesMeTHF  
149

E: -2962.15131480 ; H: -2960.809940 ; G: -2961.008607 ; D: -0.42656169

C 3.42352101 -1.74908092 0.71939447  
 C 2.22612305 -1.28131741 1.41280648  
 C 1.32724289 -2.42045706 1.38929035  
 C 1.93017917 -3.52111187 0.68769730  
 C 3.24866164 -3.09862434 0.28297067  
 C -0.62322300 1.28869784 2.80373617  
 C 0.74197602 1.19395670 2.31084984  
 C 0.91262162 2.35266544 1.45724457  
 C -0.31465612 3.10196110 1.39076661  
 C -1.27313464 2.43423423 2.23431720  
 Si 2.12836032 0.00452189 2.80568311  
 C 4.64136862 -1.10831000 0.43199843  
 C 5.63516062 -1.78988382 -0.25350258  
 H 4.81557381 -0.08509070 0.74488181  
 H 6.57503185 -1.28825869 -0.46455070  
 C 4.25925279 -3.76972358 -0.41343717  
 C 5.45197126 -3.11500454 -0.67820145  
 H 6.24788457 -3.62595762 -1.21048065  
 C 0.00950027 -2.57534613 1.87319433  
 C -0.66687577 -3.77861770 1.67143297  
 H -0.46325462 -1.80068843 2.47323515  
 H -1.67133865 -3.89562151 2.06606302  
 C 1.23643777 -4.71431796 0.50708776  
 C -0.06161959 -4.84152810 0.99667781  
 H 1.70420679 -5.54821172 -0.00885780  
 H -0.60258722 -5.77259604 0.86293680  
 C 1.77545731 -0.85206561 4.45885892  
 H 2.68513619 -1.38188915 4.76314632  
 H 1.53664843 -0.12155695 5.23838498  
 H 0.97558791 -1.59360687 4.41773719  
 C 3.76322175 0.91764843 3.08611040

|    |             |             |             |   |             |             |              |
|----|-------------|-------------|-------------|---|-------------|-------------|--------------|
| H  | 4.53928623  | 0.20150945  | 3.37439558  | C | -5.23582215 | -3.42361768 | -0.74930297  |
| H  | 4.13697814  | 1.49970773  | 2.24331539  | H | -5.70134835 | -3.11801967 | -1.69292670  |
| H  | 3.62142194  | 1.61187271  | 3.92180431  | H | -4.65191960 | -4.32850754 | -0.94962026  |
| C  | -1.35640150 | 0.48997399  | 3.70836279  | C | 0.54142698  | 0.35459221  | -2.60872032  |
| C  | -2.66454213 | 0.82055805  | 4.01745925  | C | 1.29721140  | -0.82485579 | -2.85086727  |
| H  | -0.89579765 | -0.36458134 | 4.19062711  | C | 1.09161738  | 1.56112510  | -3.12362923  |
| H  | -3.21471717 | 0.20710724  | 4.72484609  | C | 2.53836325  | -0.78679060 | -3.49427750  |
| C  | -2.59605422 | 2.75225124  | 2.56552711  | C | 2.32693386  | 1.57396738  | -3.77341148  |
| C  | -3.28968239 | 1.94447838  | 3.44994476  | C | 3.07325755  | 0.40985015  | -3.96050326  |
| H  | -3.07008663 | 3.63391679  | 2.14457936  | H | 3.09237517  | -1.71150968 | -3.63922427  |
| H  | -4.31289595 | 2.18532345  | 3.71931153  | H | 2.71925043  | 2.51742036  | -4.14705565  |
| C  | -0.38444814 | 4.30200351  | 0.67389721  | H | -2.64913448 | -5.17086100 | -6.95096656  |
| C  | 0.73277045  | 4.75886381  | -0.00674615 | H | -6.49590936 | 4.29205966  | -0.37600134  |
| H  | -1.30351106 | 4.88060531  | 0.66329501  | H | -6.04149365 | -3.69706001 | -0.06057627  |
| H  | 0.69018280  | 5.69454417  | -0.55413151 | C | -2.46064754 | 2.40758805  | -6.44626479  |
| C  | 2.01819036  | 2.81860988  | 0.70289958  | C | -3.02254753 | 3.70269514  | -6.49971442  |
| C  | 1.91967626  | 4.00938474  | -0.00048070 | C | -1.45829051 | 2.13915895  | -7.41664655  |
| H  | 2.96288838  | 2.28647026  | 0.71278874  | C | -2.61490850 | 4.65095677  | -7.45103198  |
| H  | 2.78301676  | 4.37248806  | -0.54926347 | C | -1.06100283 | 3.09271758  | -8.35457587  |
| H  | 4.11598121  | -4.79696060 | -0.73713486 | C | -1.63099203 | 4.36758775  | -8.38912030  |
| Mg | -1.75534385 | 0.09766309  | -2.59431584 | H | -3.08010253 | 5.63614050  | -7.45536154  |
| C  | -3.08947409 | 1.94327489  | -2.73126598 | H | -0.28980573 | 2.83992913  | -9.08093918  |
| C  | -4.53873556 | 2.03240618  | -2.22357686 | C | -4.08323197 | 4.15819200  | -5.52140015  |
| H  | -2.87645788 | 2.84206398  | -3.33112250 | H | -4.51579573 | 3.32831666  | -4.95737273  |
| H  | -2.44308751 | 2.13476118  | -1.85208245 | H | -3.67311223 | 4.86548021  | -4.79023076  |
| H  | -5.23905655 | 1.96260764  | -3.06757418 | H | -4.90436972 | 4.67722628  | -6.02906829  |
| H  | -4.77187293 | 1.16952876  | -1.58419419 | C | -0.76634694 | 0.79644095  | -7.45555843  |
| C  | -2.30393763 | -0.78246032 | -0.53506477 | H | -0.17533035 | 0.67222340  | -8.36817174  |
| C  | -3.21594852 | -1.89202903 | -1.09961727 | H | -0.08282956 | 0.67488957  | -6.60791383  |
| H  | -2.94156097 | 0.05824886  | -0.20916895 | H | -1.48235860 | -0.03050476 | -7.41409367  |
| H  | -1.94811266 | -1.19849920 | 0.43110965  | C | -1.19768326 | 5.38297129  | -9.41173446  |
| H  | -3.65910306 | -1.58533809 | -2.06126796 | H | -0.11725171 | 5.55899964  | -9.37006282  |
| H  | -2.61327540 | -2.77875844 | -1.33732013 | H | -1.42799731 | 5.05040814  | -10.43038684 |
| Nd | 0.26866705  | -0.05823727 | 0.01394370  | H | -1.69699300 | 6.34306631  | -9.25696259  |
| Mg | -3.04828305 | 0.96182373  | -4.90270067 | C | 0.33347749  | 2.85982868  | -3.04692299  |
| C  | -2.00845898 | -1.10202922 | -4.56288134 | H | 1.00667165  | 3.72002844  | -3.04152458  |
| C  | -2.92121760 | -2.04578264 | -5.37013942 | H | -0.31932803 | 2.97182361  | -3.92094680  |
| H  | -1.63066740 | -1.74044867 | -3.73866046 | H | -0.29963680 | 2.92555305  | -2.16008883  |
| H  | -1.09546006 | -0.92752825 | -5.15117648 | C | 0.78203179  | -2.19393529 | -2.45994016  |
| H  | -3.81199203 | -2.30360317 | -4.78169479 | H | 0.55205350  | -2.77863026 | -3.35651767  |
| H  | -3.30546572 | -1.53748840 | -6.26550600 | H | 1.52006404  | -2.76767606 | -1.89243331  |
| C  | -4.36165974 | -2.31384092 | -0.17372142 | H | -0.15301941 | -2.16368437 | -1.88446300  |
| H  | -3.93792010 | -2.63888871 | 0.78437145  | C | 4.39795280  | 0.44227504  | -4.66869993  |
| H  | -4.97898749 | -1.43574522 | 0.05311335  | H | 5.07529428  | -0.32369601 | -4.28251094  |
| C  | -2.25181730 | -3.34910399 | -5.81948458 | H | 4.27007142  | 0.25620290  | -5.74147999  |
| H  | -1.90661872 | -3.89569137 | -4.93209973 | H | 4.88500992  | 1.41504590  | -4.56329976  |
| H  | -1.34999393 | -3.10443770 | -6.39487847 | O | -5.07364262 | 0.46424911  | -5.39951282  |
| C  | -4.86802430 | 3.30827134  | -1.44166826 | C | -5.78569319 | 0.96033195  | -6.58997899  |
| H  | -4.65707436 | 4.17839209  | -2.07597613 | C | -5.98828391 | -0.31063289 | -4.59843029  |
| H  | -4.18203972 | 3.38316764  | -0.58909693 | C | -7.27084732 | 0.68828614  | -6.30535913  |
| C  | -6.30811668 | 3.37445501  | -0.94279448 | H | -5.57570555 | 2.03049964  | -6.62521644  |
| H  | -6.54217814 | 2.52980993  | -0.28519664 | C | -5.26583281 | 0.29501122  | -7.84483090  |
| H  | -7.02259307 | 3.35326932  | -1.77336503 | C | -7.32799083 | 0.36308543  | -4.81255759  |
| C  | -3.15992283 | -4.25060595 | -6.65005287 | H | -5.99869967 | -1.34653221 | -4.95536592  |
| H  | -4.05569299 | -4.54130847 | -6.08964779 | H | -5.63023545 | -0.29275703 | -3.56878709  |
| H  | -3.49221654 | -3.74717196 | -7.56468849 | H | -7.61024266 | -0.17130054 | -6.89185715  |

H -7.89204203 1.54322656 -6.57879393  
H -5.82152376 0.67366015 -8.70909145  
H -4.21063062 0.52465428 -8.00499971  
H -5.40086602 -0.78989588 -7.80476534  
H -8.16716384 -0.28340929 -4.54726842  
H -7.39226967 1.27461294 -4.21212536

SiFlu2\_BuBu\_Mg\_MesBu\_Mg\_MesMeTHF  
149

E: -2962.14838743 ; H: -2960.807635 ; G: -  
2961.006030 ; D: -0.43439297

C 2.83438696 -1.60910064 0.88128547  
C 1.73212503 -1.67992517 1.83091902  
C 1.25827194 -3.05695897 1.73608179  
C 2.00778975 -3.77082483 0.74778695  
C 2.99969246 -2.86915181 0.21444111  
C -0.66543068 1.25946752 2.64883632  
C 0.77390063 1.08070836 2.65145340  
C 1.31035620 2.43025694 2.52753327  
C 0.24444903 3.38038094 2.42308267  
C -0.99663295 2.65111746 2.48837095  
Si 1.63286442 -0.48176537 3.30301752  
C 3.69176183 -0.54408607 0.52569388  
C 4.68270429 -0.74161221 -0.42914666  
H 3.61810093 0.42121556 1.02027363  
H 5.34351739 0.07979357 -0.68722874  
C 4.00873031 -3.04600350 -0.73328592  
C 4.84896230 -1.98495952 -1.05116041  
H 5.63911459 -2.11865207 -1.78273712  
C 0.23642924 -3.74222810 2.41946632  
C -0.02447213 -5.07077049 2.12158474  
H -0.34517250 -3.24551595 3.18840757  
H -0.80999868 -5.59228141 2.66062162  
C 1.72419335 -5.10863246 0.45455969  
C 0.70901066 -5.75665541 1.14068848  
H 2.30020280 -5.63965766 -0.29822704  
H 0.48383362 -6.79652283 0.92678267  
C 0.68617831 -1.21603685 4.77139893  
H 1.17185339 -2.13900428 5.10369217  
H 0.73279594 -0.49586688 5.59586804  
H -0.36807528 -1.43037382 4.59227562  
C 3.36294937 -0.11915345 3.98501424  
H 3.72228316 -1.02839892 4.47977089  
H 4.10312338 0.14576801 3.22865199  
H 3.32631535 0.67808969 4.73404885  
C -1.72561851 0.32859071 2.74194838  
C -3.04430546 0.77193535 2.71000509  
H -1.52823230 -0.72652243 2.90735237  
H -3.84917145 0.05000218 2.80930759  
C -2.32705753 3.06887102 2.45869109  
C -3.34768870 2.13172019 2.57585235  
H -2.56740130 4.12323660 2.35678868  
H -4.38369834 2.45372211 2.56692769  
C 0.50632761 4.74687391 2.27905602  
C 1.81930666 5.18812250 2.23943938  
H -0.31148898 5.45797858 2.20324132

H 2.03604235 6.24625527 2.13410406  
C 2.63405100 2.90879958 2.48403496  
C 2.87395103 4.26671927 2.34320688  
H 3.47105476 2.22559252 2.57343088  
H 3.89872410 4.62561354 2.31887772  
H 4.14467194 -4.00961985 -1.21650716  
Mg -1.47711680 0.29258108 -2.56474363  
C -1.79620044 -1.19797130 -0.78063068  
C -3.09830572 -1.93216523 -1.14282160  
H -1.91301348 -0.98974275 0.30487381  
H -1.00283242 -1.97694743 -0.84523939  
H -3.94813156 -1.24981820 -1.02779673  
H -3.08138626 -2.21666135 -2.20179495  
Nd 0.35158501 -0.04665644 0.23787185  
Mg -3.25307503 0.74153099 -4.77717219  
C -1.86463417 -1.05798318 -4.43773676  
C -2.77561153 -2.10294838 -5.11582328  
H -1.27580297 -1.63482149 -3.70289439  
H -1.10653135 -0.75600100 -5.18057365  
H -3.52477510 -2.47279724 -4.40223102  
H -3.34969655 -1.63892317 -5.93312900  
C -3.35751027 -3.18617629 -0.29975539  
H -2.50470455 -3.86804348 -0.40254378  
H -3.38758692 -2.90033272 0.75944725  
C -2.03627569 -3.31074115 -5.70255704  
H -1.48056207 -3.81078258 -4.89842262  
H -1.28294959 -2.95109808 -6.41459220  
C -2.95377748 -4.31552497 -6.39192841  
H -3.69721288 -4.72128210 -5.69653256  
H -3.49736939 -3.85318124 -7.22327947  
C -4.64375066 -3.91943379 -0.66489898  
H -5.52239492 -3.27735875 -0.53954552  
H -4.62774118 -4.26251269 -1.70483472  
C 0.84026891 0.80038969 -2.24475202  
C 1.62051791 -0.02689701 -3.09820044  
C 1.20910543 2.17612422 -2.21052571  
C 2.64430263 0.50057011 -3.89147862  
C 2.25702980 2.67280842 -2.98543380  
C 2.97858833 1.85063251 -3.85069805  
H 3.20673896 -0.16510480 -4.54319504  
H 2.51121276 3.72920934 -2.92349519  
H -2.39073498 -5.16143387 -6.79891809  
H -4.78973786 -4.80144931 -0.03334735  
C -3.39995252 1.25475505 -6.87765270  
H -4.30271825 0.75163295 -7.26768072  
H -3.63232493 2.33030082 -6.96816808  
C -2.23674499 0.92792050 -7.82199763  
H -2.00751824 -0.14735212 -7.77641445  
H -1.31846725 1.42912830 -7.48198526  
C -2.45987940 1.29997966 -9.29345131  
H -2.67674401 2.37474373 -9.35722775  
H -3.36304980 0.78987519 -9.65479314  
C -1.28364313 0.96038024 -10.20491518  
H -1.06365531 -0.11324639 -10.18625476  
H -1.48124165 1.23656685 -11.24626902  
H -0.37367302 1.48517982 -9.89238910

C -2.65844462 2.21815218 -3.00664550  
 C -2.05894436 3.26394496 -3.75111438  
 C -3.64609059 2.61693745 -2.06092468  
 C -2.42678898 4.60457783 -3.56469393  
 C -3.98437802 3.95522084 -1.87713758  
 C -3.38130626 4.97190402 -2.62538732  
 H -1.95034325 5.37625250 -4.16657133  
 H -4.73917494 4.21995726 -1.13893385  
 C -4.36339660 1.58298559 -1.22974231  
 H -3.69209610 1.10999825 -0.50514378  
 H -5.18800144 2.02202376 -0.66157005  
 H -4.77270655 0.79074953 -1.86282183  
 C -0.99724716 2.98907494 -4.78837566  
 H -1.30703104 3.33947359 -5.77812954  
 H -0.06325976 3.50294449 -4.54221199  
 H -0.76146665 1.92427570 -4.87005289  
 C -3.75896614 6.41054399 -2.40760684  
 H -3.30728863 7.06235897 -3.15910332  
 H -4.84416219 6.54910800 -2.44807347  
 H -3.42846560 6.75921615 -1.42261483  
 C 0.50812229 3.15387037 -1.29723031  
 H 0.41728837 4.14245787 -1.75404006  
 H -0.50890769 2.83621107 -1.04757983  
 H 1.06476376 3.30506680 -0.36373913  
 C 1.42579856 -1.52290426 -3.16691767  
 H 1.19266170 -1.85634480 -4.18284783  
 H 2.34029605 -2.04086638 -2.86103768  
 H 0.61845988 -1.87475362 -2.51975073  
 C 4.06524725 2.41238588 -4.72333214  
 H 4.78399192 1.64283571 -5.01553792  
 H 3.64521763 2.83468658 -5.64384132  
 H 4.60975813 3.21513340 -4.21848241  
 O -5.38568366 0.59675810 -4.33311341  
 C -6.27115127 -0.45859966 -4.83922868  
 C -6.05905058 1.87661393 -4.43109233  
 C -7.53170290 0.26628079 -5.31975776  
 H -5.74554252 -0.91114028 -5.68590563  
 C -6.51900939 -1.49273784 -3.76436046  
 C -7.06615705 1.70152711 -5.54948375  
 H -6.54671692 2.09217355 -3.47432986  
 H -5.30675883 2.64343730 -4.62144409  
 H -8.29918662 0.23553928 -4.53886805  
 H -7.94457793 -0.20238733 -6.21525611  
 H -7.15918826 -2.28750692 -4.16071385  
 H -5.58797353 -1.95201916 -3.42725411  
 H -7.02295316 -1.04837380 -2.90116758  
 H -7.87689843 2.43114911 -5.49191122  
 H -6.57393497 1.80417782 -6.51994163

SiFlu2\_BuMes\_Mg\_BuMes\_Mg\_BuMeTHF  
 149

E: -2962.15081000 ; H: -2960.808935 ; G: -  
 2961.005660 ; D: -0.42929196

C 2.61270966 -1.97861888 1.06579216  
 C 1.73614544 -1.99068452 2.21927232  
 C 0.72174795 -2.97633933 1.90841703

C 0.93992845 -3.51413596 0.59079736  
 C 2.12723805 -2.89581128 0.06573094  
 C -0.72210626 0.66463636 3.27238553  
 C 0.72019547 0.58649631 3.23840127  
 C 1.13903509 1.72248339 2.44880911  
 C -0.01131267 2.43021158 1.94524339  
 C -1.17860434 1.76733388 2.46196992  
 Si 1.79944935 -0.88236946 3.75284231  
 C 3.80649462 -1.26962864 0.78327338  
 C 4.49230667 -1.51072181 -0.39147107  
 H 4.21462817 -0.56868674 1.50075333  
 H 5.42005613 -0.97985277 -0.58201875  
 C 2.84196496 -3.12006904 -1.12118962  
 C 4.02202267 -2.43743194 -1.34284881  
 H 4.59197165 -2.61501418 -2.24871408  
 C -0.38414707 -3.46690159 2.64545041  
 C -1.18737648 -4.45583422 2.11236368  
 H -0.58726466 -3.09785960 3.64260113  
 H -2.01784862 -4.83753602 2.69822130  
 C 0.10747679 -4.51882945 0.07117092  
 C -0.94636978 -4.98846294 0.83069469  
 H 0.30226015 -4.93568086 -0.91271405  
 H -1.58829343 -5.77398903 0.44598674  
 C 1.17339599 -1.75705905 5.31248973  
 H 1.80742619 -2.63000532 5.50231664  
 H 1.27798623 -1.07596210 6.16437551  
 H 0.14020487 -2.10295669 5.29663537  
 C 3.55951343 -0.37312980 4.23463840  
 H 4.09277010 -1.26010558 4.59377722  
 H 4.16714330 0.07257242 3.44763149  
 H 3.51077925 0.34523085 5.06030263  
 C -1.70413952 -0.11963166 3.93291671  
 C -3.03973933 0.19972703 3.81045045  
 H -1.40806121 -0.94126949 4.57304844  
 H -3.77776955 -0.39355729 4.34168058  
 C -2.54966359 2.07136086 2.35668229  
 C -3.46947828 1.29256559 3.02596588  
 H -2.87290431 2.92346534 1.76690500  
 H -4.52761183 1.52433010 2.96370570  
 C 0.13561892 3.60441108 1.18382990  
 C 1.40083385 4.07348207 0.90407789  
 H -0.73995823 4.13965798 0.83104280  
 H 1.52809725 4.98127782 0.32413600  
 C 2.42371645 2.23239867 2.12731289  
 C 2.53781122 3.38498117 1.38006086  
 H 3.31654274 1.74969707 2.50441768  
 H 3.52513321 3.77913160 1.15989179  
 H 2.47953059 -3.83925142 -1.84980599  
 Mg -1.44985765 0.55836459 -2.00013932  
 C -2.19316675 -0.93197049 -0.39655545  
 C -3.62178086 -1.36235056 -0.77495904  
 H -2.28536744 -0.69722814 0.68677259  
 H -1.58712406 -1.86240803 -0.44769344  
 H -4.31500213 -0.55510743 -0.51858281  
 H -3.70236610 -1.49956786 -1.86067733  
 Nd 0.15155106 -0.34531490 0.75771162

Mg -2.66236766 1.16845727 -4.58198398  
C -1.32617521 -0.65614716 -3.99393431  
C -1.95856438 -2.04454368 -4.19330989  
H -0.39341602 -0.82090948 -3.42032212  
H -0.88807401 -0.35565822 -4.96330291  
H -2.33206008 -2.42936659 -3.23516142  
H -2.84318782 -1.96031738 -4.83672427  
C -4.11251770 -2.64208335 -0.09024007  
H -3.43485009 -3.46610962 -0.34211176  
H -4.03953416 -2.51144642 0.99644765  
C -1.02133535 -3.09666936 -4.79641182  
H -0.14424995 -3.20653629 -4.14528285  
H -0.63789330 -2.72604239 -5.75596331  
C -1.67716212 -4.45889963 -5.00302677  
H -2.05326358 -4.86905235 -4.05911405  
H -2.52512619 -4.39315801 -5.69388601  
C -5.54240833 -3.01938134 -0.46438132  
H -6.24920732 -2.22511754 -0.19918032  
H -5.64011232 -3.20362380 -1.53996503  
H -0.97324137 -5.18667151 -5.41974086  
H -5.86442482 -3.92924305 0.05200417  
C -2.43851152 2.56944529 -2.66157843  
C -1.53006025 3.60247900 -3.03045947  
C -3.58148127 2.99505109 -1.93853390  
C -1.74898143 4.93446485 -2.67725981  
C -3.78032816 4.33394223 -1.58533278  
C -2.87149226 5.32368787 -1.94669758  
H -1.03103932 5.69135607 -2.98832028  
H -4.67240062 4.61285288 -1.02705757  
C -2.52477184 2.38557283 -6.41236055  
C -3.42691225 3.45979525 -6.58994174  
C -1.56788320 2.21732070 -7.44584443  
C -3.37601402 4.29419685 -7.71584942  
C -1.52888113 3.05677786 -8.56180317  
C -2.43094475 4.11051424 -8.71861244  
H -4.08858211 5.11320160 -7.80509436  
H -0.77162206 2.89231214 -9.32741744  
C 0.78732839 1.09078934 -1.38238157  
H 1.37330380 1.44905203 -0.50989792  
H 0.38334990 2.06292735 -1.70947910  
C 1.81591735 0.62501888 -2.42832062  
H 2.23625305 -0.35303476 -2.15766861  
H 1.31973137 0.45803810 -3.39307625  
C 2.97930608 1.59770410 -2.65337055  
H 3.55144344 1.68926331 -1.72154792  
H 2.57370006 2.59607121 -2.85683007  
C 3.90902600 1.18632640 -3.79065300  
H 3.37367224 1.14464655 -4.74566762  
H 4.73672682 1.89311727 -3.91001159  
H 4.34373156 0.19673289 -3.61566540  
C -4.66617440 2.02278536 -1.55523490  
H -4.86988390 2.03340548 -0.47922262  
H -5.60963177 2.26510447 -2.05813360  
H -4.39163011 1.00477424 -1.82954438  
C -0.31337061 3.31701309 -3.87558019  
H -0.46449078 3.68211581 -4.89629999

H 0.57843986 3.81050319 -3.47820522  
H -0.09799207 2.24668530 -3.94353195  
C -3.09389766 6.76595295 -1.58534422  
H -3.20767007 7.38293815 -2.48315695  
H -3.99270708 6.89327178 -0.97715912  
H -2.24627737 7.17209213 -1.02360209  
C -4.51220385 3.74568178 -5.57708067  
H -4.19762157 3.49449363 -4.56080158  
H -4.79349494 4.80336217 -5.57568869  
H -5.42762457 3.17774858 -5.79035925  
C -0.52843639 1.12350752 -7.36278239  
H 0.15598587 1.28270408 -6.52169117  
H -0.98402013 0.13699977 -7.22620022  
H 0.08197998 1.07411095 -8.26975737  
C -2.36760599 5.01432597 -9.92038268  
H -2.48096812 4.45222300 -10.85409216  
H -3.15545077 5.77175774 -9.89137303  
H -1.40682328 5.53812306 -9.97815509  
O -4.50628947 0.11403711 -5.07878741  
C -5.04954015 0.13544370 -6.44715762  
C -5.43753305 -0.59820956 -4.24431773  
C -6.54444961 -0.19819658 -6.29322659  
H -4.88879254 1.15412134 -6.79829504  
C -4.29793680 -0.83259675 -7.33498130  
C -6.79543919 -0.19640170 -4.78324090  
H -5.26903733 -1.67731187 -4.34273140  
H -5.25927847 -0.30820012 -3.21066064  
H -6.74894646 -1.18858179 -6.71119150  
H -7.17078071 0.52066450 -6.82470855  
H -4.71103855 -0.78906523 -8.34803205  
H -3.24021442 -0.57023257 -7.39982916  
H -4.39122100 -1.86221392 -6.97632502  
H -7.58596337 -0.88643739 -4.48032014  
H -7.05805986 0.80413066 -4.42857898

SiFlu2\_BuBu\_Mg\_MesMes\_Mg\_BuMeTHF  
149

E: -2962.13971834 ; H: -2960.798543 ; G: -2960.996648 ; D: -0.43710425

C 2.71995218 -2.06599782 0.65485422  
C 1.96845328 -2.07727313 1.88951403  
C 0.83498065 -2.93512339 1.62958728  
C 0.83901603 -3.35944570 0.24971126  
C 2.02218700 -2.81380624 -0.36115057  
C -0.28583690 0.77270056 3.39110581  
C 1.09314583 0.55481684 2.98576840  
C 1.48530720 1.79128617 2.33259235  
C 0.37153837 2.70111290 2.28721406  
C -0.73485079 2.06401868 2.94930068  
Si 2.19135110 -0.93872466 3.38735041  
C 3.98113344 -1.50998921 0.32009770  
C 4.50652240 -1.70586926 -0.93909187  
H 4.55782184 -0.97545715 1.06492865  
H 5.48517708 -1.29933440 -1.17515925  
C 2.57761186 -2.98744543 -1.64275339  
C 3.80967717 -2.43673949 -1.92549661

|    |             |             |             |   |             |             |             |
|----|-------------|-------------|-------------|---|-------------|-------------|-------------|
| H  | 4.25583914  | -2.57667712 | -2.90450031 | H | -2.58609817 | 4.97507031  | -2.10276075 |
| C  | -0.22326904 | -3.39329270 | 2.45671978  | H | -6.03073478 | 2.53919761  | -1.44970924 |
| C  | -1.17315516 | -4.25579197 | 1.94944985  | C | 0.49297768  | 1.24421306  | -1.51194276 |
| H  | -0.26631510 | -3.11024640 | 3.50082495  | H | 0.35695214  | 2.10034208  | -0.82300011 |
| H  | -1.95975850 | -4.62132322 | 2.60240411  | H | 0.06130862  | 1.64831649  | -2.44093198 |
| C  | -0.14181035 | -4.24261648 | -0.23954000 | C | 1.99595894  | 1.08147573  | -1.79478502 |
| C  | -1.13686564 | -4.68730186 | 0.60632502  | H | 2.54965771  | 0.81606965  | -0.87808672 |
| H  | -0.10022905 | -4.58564983 | -1.26851298 | H | 2.15831363  | 0.23195965  | -2.46774662 |
| H  | -1.89026647 | -5.37890658 | 0.24416378  | C | 2.68308637  | 2.31991860  | -2.38097435 |
| C  | 1.72078986  | -1.78086717 | 5.01993643  | H | 2.49983821  | 3.17121520  | -1.71547133 |
| H  | 2.42655792  | -2.59804529 | 5.20630879  | H | 2.20065756  | 2.56818419  | -3.33487872 |
| H  | 1.82051309  | -1.05722173 | 5.83626697  | C | 4.18292644  | 2.14827736  | -2.59732495 |
| H  | 0.71691015  | -2.20095840 | 5.07790334  | H | 4.39986691  | 1.31281769  | -3.27154883 |
| C  | 4.00010103  | -0.45223094 | 3.67743879  | H | 4.63016647  | 3.04781603  | -3.03305210 |
| H  | 4.59272995  | -1.35766216 | 3.84818606  | H | 4.70086006  | 1.94801533  | -1.65352926 |
| H  | 4.48504468  | 0.11648849  | 2.88421575  | C | -4.18904041 | -1.01212905 | -5.96854284 |
| H  | 4.05185937  | 0.15644022  | 4.58701909  | H | -3.55526748 | -1.70575712 | -6.54787438 |
| C  | -1.19702078 | -0.03106109 | 4.11329560  | H | -4.70376239 | -1.66137110 | -5.24209051 |
| C  | -2.46980304 | 0.43653392  | 4.38440331  | C | -5.24209150 | -0.42052248 | -6.91312979 |
| H  | -0.89992101 | -1.00506421 | 4.48174051  | H | -4.75891566 | 0.22365194  | -7.66447280 |
| H  | -3.15306539 | -0.18505478 | 4.95534824  | H | -5.91963928 | 0.24729467  | -6.35865154 |
| C  | -2.03421478 | 2.51171309  | 3.22338827  | C | -6.10342123 | -1.44426077 | -7.66455444 |
| C  | -2.89662633 | 1.70169201  | 3.94062251  | H | -5.44217204 | -2.11389945 | -8.23050942 |
| H  | -2.35623558 | 3.49378874  | 2.88889833  | H | -6.61736656 | -2.07986366 | -6.93141087 |
| H  | -3.90118508 | 2.04187948  | 4.17043763  | C | -7.12864916 | -0.82049474 | -8.60759135 |
| C  | 0.49811095  | 3.97192397  | 1.71277845  | H | -6.64293226 | -0.20777355 | -9.37606864 |
| C  | 1.71498564  | 4.36308908  | 1.18200385  | H | -7.72398193 | -1.58095692 | -9.12431788 |
| H  | -0.34853092 | 4.65248126  | 1.69949671  | H | -7.82593658 | -0.17175894 | -8.06516175 |
| H  | 1.82859712  | 5.35167820  | 0.74912802  | C | -1.05133097 | -1.22177309 | -4.01206212 |
| C  | 2.70732501  | 2.21759123  | 1.76154363  | C | -1.60932121 | -2.53385735 | -3.95645942 |
| C  | 2.81171954  | 3.48349921  | 1.21182186  | C | 0.09966064  | -1.09699959 | -4.83227443 |
| H  | 3.57870656  | 1.57423159  | 1.77736516  | C | -1.07293772 | -3.60091719 | -4.67387903 |
| H  | 3.76397681  | 3.80669252  | 0.80262104  | C | 0.62503207  | -2.18345822 | -5.54687373 |
| H  | 2.04984703  | -3.56711567 | -2.39321361 | C | 0.04930953  | -3.44539253 | -5.48962862 |
| Mg | -1.51975927 | 0.13280031  | -2.20465043 | H | -1.54691274 | -4.57832176 | -4.60676265 |
| C  | -2.22346049 | -0.61581657 | -0.09671789 | H | 1.50506068  | -2.03107615 | -6.16952744 |
| C  | -3.74756268 | -0.81853523 | -0.13063765 | C | -2.79891145 | -2.83035258 | -3.08214431 |
| H  | -2.08674668 | 0.14793264  | 0.70149011  | H | -3.36100734 | -3.69561556 | -3.44336213 |
| H  | -1.82686777 | -1.56919423 | 0.32367657  | H | -2.48931910 | -3.04852749 | -2.05353002 |
| H  | -4.22367607 | 0.13319084  | -0.38827906 | H | -3.49114467 | -1.98716641 | -3.04405044 |
| H  | -4.02002733 | -1.51991850 | -0.92599442 | C | 0.83325600  | 0.20955640  | -5.00770467 |
| Nd | 0.31921682  | -0.35701365 | 0.54025064  | H | 0.87447108  | 0.50652579  | -6.06080176 |
| Mg | -2.79415905 | 0.28882298  | -4.93345479 | H | 0.37117310  | 1.02087889  | -4.44664951 |
| C  | -4.35055139 | -1.32994783 | 1.18168724  | H | 1.87104870  | 0.12553763  | -4.67228280 |
| H  | -3.89666535 | -2.29779841 | 1.42781525  | C | 0.58746030  | -4.59523807 | -6.29401742 |
| H  | -4.07360117 | -0.64702064 | 1.99310782  | H | -0.08662826 | -4.84075138 | -7.12267496 |
| C  | -5.86824963 | -1.47653429 | 1.13172517  | H | 1.56638136  | -4.36312529 | -6.72064221 |
| H  | -6.35706486 | -0.51276558 | 0.95218015  | H | 0.68863835  | -5.49894406 | -5.68502097 |
| H  | -6.17953118 | -2.15913259 | 0.33314889  | C | -1.25463257 | 3.40051685  | -3.70973304 |
| H  | -6.26298289 | -1.87173922 | 2.07338803  | H | -1.42804326 | 4.27438855  | -4.34822193 |
| C  | -3.15363599 | 1.75151173  | -3.17590486 | H | -0.45962617 | 3.68271543  | -3.01334506 |
| C  | -2.53311580 | 3.01948628  | -3.00058777 | H | -0.88926246 | 2.60333553  | -4.35742208 |
| C  | -4.46155114 | 1.64413027  | -2.61073671 | C | -5.34470597 | 0.45316032  | -2.89166660 |
| C  | -3.11359107 | 4.03044004  | -2.22278174 | H | -6.04046573 | 0.25503679  | -2.07231322 |
| C  | -5.03031364 | 2.67167303  | -1.85755958 | H | -5.94840633 | 0.63356336  | -3.78884773 |
| C  | -4.35562348 | 3.86957245  | -1.62122241 | H | -4.77981190 | -0.45894591 | -3.08419486 |

C -4.95880487 4.94291257 -0.75943721  
H -4.44001013 5.89677212 -0.88367991  
H -6.01630707 5.09810696 -0.99393508  
H -4.90224485 4.67088443 0.30087880  
O -2.25208026 1.70493176 -6.49828648  
C -1.37487815 1.58663083 -7.66607081  
C -3.15134696 2.83155600 -6.66475081  
C -1.89679022 2.62808604 -8.65139960  
H -0.37429825 1.87263127 -7.32312173  
C -1.36019348 0.16782260 -8.18573177  
C -2.51638998 3.68666332 -7.74481860  
H -4.13125921 2.45463506 -6.97572372  
H -3.25518150 3.32587054 -5.69878825  
H -2.66003884 2.18181070 -9.29774994  
H -1.09686232 3.01340586 -9.28703876  
H -0.67158145 0.10220947 -9.03459442  
H -1.01995539 -0.54342584 -7.42949808  
H -2.35334743 -0.13668103 -8.52417729  
H -3.24967602 4.31682489 -8.25205558  
H -1.74307719 4.33350017 -7.31934636

SiFlu2\_BuPh\_Mg\_BuBu\_Mg\_PhMeTHF

131

E: -2726.29245412 ; H: -2725.125634 ; G: -2725.307166 ; D: -0.37219244

C 3.13303784 -1.76014479 0.52746529  
C 2.08346273 -1.47811513 1.49233859  
C 1.14267982 -2.56746898 1.34377327  
C 1.57164437 -3.45627142 0.29342491  
C 2.82845050 -2.95576324 -0.20164386  
C -0.69578344 1.04657205 2.81576620  
C 0.69988801 1.00400153 2.42930058  
C 0.87875471 2.13979508 1.54871792  
C -0.37019169 2.83560762 1.37681473  
C -1.35791415 2.14414619 2.16499194  
Si 2.04567399 -0.23374874 2.91826132  
C 4.32745273 -1.07964139 0.21723204  
C 5.16739670 -1.57263730 -0.76636476  
H 4.60419685 -0.17812993 0.75126057  
H 6.08827959 -1.04307690 -0.99217904  
C 3.69035039 -3.43732915 -1.19392182  
C 4.85717620 -2.74626960 -1.47430172  
H 5.53818001 -3.11222639 -2.23590250  
C -0.08937803 -2.83804589 1.98361724  
C -0.82606438 -3.96030384 1.62383440  
H -0.44782812 -2.21043626 2.79318574  
H -1.75855109 -4.16908824 2.13881218  
C 0.80859720 -4.57458718 -0.05089563  
C -0.38436683 -4.82763571 0.61556947  
H 1.15055423 -5.25100016 -0.82933158  
H -0.97425368 -5.70166231 0.35975456  
C 1.67787635 -1.09769504 4.56438998  
H 2.57848373 -1.64815782 4.85920341  
H 1.46375603 -0.36506157 5.34933011  
H 0.86193936 -1.82124238 4.53311819  
C 3.70855026 0.62097664 3.21717624

H 4.46849554 -0.12828671 3.46202803  
H 4.08958582 1.23463121 2.40068076  
H 3.59478055 1.27678658 4.08768524  
C -1.45780995 0.23783951 3.69172470  
C -2.79748146 0.51111132 3.89477184  
H -0.99081920 -0.57473952 4.23601025  
H -3.36776182 -0.10745468 4.58139379  
C -2.71849231 2.40269144 2.38963162  
C -3.43378246 1.58707808 3.24667559  
H -3.20215709 3.24657523 1.90689201  
H -4.48427622 1.78310831 3.43503257  
C -0.44086275 4.00469945 0.60531154  
C 0.69645212 4.47398916 -0.02776039  
H -1.37777248 4.54601307 0.51526221  
H 0.65374841 5.38477406 -0.61577005  
C 2.00691057 2.61463424 0.83499298  
C 1.90799468 3.76830048 0.07750042  
H 2.96220806 2.10860798 0.90800818  
H 2.78589658 4.13661227 -0.44361762  
H 3.45212225 -4.34986064 -1.73353413  
Mg -1.74915982 0.03110658 -2.57707303  
C -2.96255212 2.01294231 -2.64234741  
C -4.43654552 2.40250893 -2.41721537  
H -2.44488888 2.87877093 -3.08829393  
H -2.50360340 1.96460303 -1.63546744  
H -4.96055680 2.50533652 -3.38020553  
H -4.96125607 1.59232858 -1.89313607  
C -2.26576197 -1.16946044 -0.70067775  
C -3.73211266 -1.41685427 -1.11011506  
H -2.34765118 -0.83057052 0.35589166  
H -1.78743800 -2.16392693 -0.63215758  
H -4.28121116 -0.46626525 -1.08718310  
H -3.78222055 -1.76993047 -2.15041774  
Nd 0.11039466 -0.21689454 0.13187275  
Mg -3.03005220 1.09840010 -4.76055585  
C -1.84714270 -0.91787050 -4.66036288  
C -2.18215306 -2.40209463 -4.42313854  
H -0.75414645 -0.82486754 -4.76740172  
H -2.18516730 -0.70261050 -5.69318444  
H -1.80697847 -2.73148912 -3.44174176  
H -3.27111837 -2.53865051 -4.37000460  
C -4.47574052 -2.42738300 -0.22998617  
H -3.94878717 -3.38836888 -0.27191356  
H -4.41994327 -2.09278913 0.81339759  
C -1.62685057 -3.35990514 -5.48250809  
H -0.53643395 -3.24476058 -5.52633331  
H -2.00120047 -3.05215464 -6.46775487  
C -4.65254783 3.70036708 -1.63316538  
H -4.13602421 4.51807419 -2.15125896  
H -4.16579660 3.60475031 -0.65453713  
C -6.12195241 4.06122873 -1.43899658  
H -6.65738602 3.27524323 -0.89436704  
H -6.62919243 4.19984483 -2.40033654  
C -1.97825614 -4.82346257 -5.23471422  
H -1.59275287 -5.16896164 -4.26897436  
H -3.06306505 -4.97897754 -5.22883057

C -5.93520789 -2.62405188 -0.62697756  
H -6.49710338 -1.68592010 -0.55898864  
H -6.02449932 -2.99238324 -1.65500010  
C 0.51800169 0.51527233 -2.36471894  
C 1.38472269 -0.45346043 -2.91969340  
C 0.74426479 1.84131048 -2.78924066  
C 2.40148495 -0.13311602 -3.81728629  
C 1.74280842 2.17793385 -3.70146662  
C 2.57669581 1.18893056 -4.21401710  
H 3.04915826 -0.91188190 -4.20781985  
H 1.87048655 3.21102208 -4.01099751  
H -1.55822879 -5.47549731 -6.00729348  
H -6.23768770 4.99028546 -0.87178681  
H -6.43216731 -3.35050850 0.02359917  
C -2.44198878 2.49833655 -6.29532574  
C -3.02961962 3.76908901 -6.46623441  
C -1.37098371 2.22362967 -7.17046615  
C -2.59966249 4.68754985 -7.42538053  
C -0.92275438 3.12599490 -8.13628633  
C -1.53977512 4.36636294 -8.26892393  
H -3.08828946 5.65525536 -7.51345506  
H -0.08873400 2.86346197 -8.78295408  
O -4.96812962 0.42187552 -5.26458731  
C -5.65692460 0.75828969 -6.52312660  
C -5.86088958 -0.32436740 -4.41112597  
C -7.10806140 0.31457911 -6.30608420  
H -5.58429744 1.84488201 -6.61262144  
C -4.96899568 0.09544881 -7.69497411  
C -7.24129306 0.17145913 -4.79063984  
H -5.74718458 -1.39492845 -4.61603969  
H -5.58012059 -0.12729675 -3.37660088  
H -7.27803861 -0.65139517 -6.79272470  
H -7.81170158 1.03216211 -6.73223728  
H -5.50560975 0.34193785 -8.61691479  
H -3.94246549 0.45145118 -7.80407220  
H -4.96486513 -0.99313708 -7.58385849  
H -8.02926129 -0.52340000 -4.49299956  
H -7.43783934 1.13846378 -4.31892940  
H -1.19667055 5.07541787 -9.01698090  
H 3.36018931 1.44762966 -4.91977312  
H 1.27200760 -1.50666995 -2.65690056  
H 0.12277467 2.64697032 -2.40422120  
H -3.85750240 4.07428922 -5.82483216  
H -0.85048265 1.26825335 -7.10067649

SiFlu2\_BuPh\_Mg\_BuPh\_Mg\_BuMeTHF

131

E: -2726.29267553 ; H: -2725.126162 ; G: -2725.306820 ; D: -0.37364756

C 2.77716544 -1.57496631 0.50613712  
C 1.90878193 -1.60263888 1.67120289  
C 1.17123599 -2.85370607 1.55103788  
C 1.55683432 -3.54303261 0.35526292  
C 2.56482857 -2.74753462 -0.29801612  
C -0.54845648 0.91417390 2.95747114  
C 0.89249373 0.94589519 2.83443826

C 1.17815849 2.16981692 2.12351862  
C -0.04918413 2.83326462 1.75789906  
C -1.13302471 2.04307019 2.27721364  
Si 2.06751155 -0.49446278 3.20319987  
C 3.71422903 -0.61996217 0.04943323  
C 4.43107639 -0.85412619 -1.11482389  
H 3.90571996 0.28753128 0.61177933  
H 5.15750086 -0.11917427 -1.44696857  
C 3.30147739 -2.96191615 -1.46655705  
C 4.23862282 -2.02185696 -1.86703947  
H 4.82124360 -2.18478518 -2.76781666  
C 0.19767730 -3.45154197 2.37703062  
C -0.35447681 -4.67151124 2.02514198  
H -0.11792965 -2.97016363 3.29496587  
H -1.09615597 -5.12618213 2.67512183  
C 0.98174101 -4.77288793 0.01359944  
C 0.02855886 -5.33462310 0.84710588  
H 1.28717058 -5.28850747 -0.89256295  
H -0.41850150 -6.29132546 0.59727002  
C 1.63427330 -1.39760815 4.81047216  
H 2.31590621 -2.24556340 4.93700721  
H 1.79567714 -0.70984602 5.64808924  
H 0.61778830 -1.78094899 4.89442979  
C 3.85025900 0.07424567 3.49828419  
H 4.44050119 -0.79705073 3.80292449  
H 4.36027450 0.51895926 2.64395498  
H 3.87191546 0.79735377 4.32075003  
C -1.42628821 0.00496510 3.60052528  
C -2.78674738 0.23399342 3.59026983  
H -1.03442026 -0.84847997 4.13897635  
H -3.44463045 -0.45671401 4.10868522  
C -2.52381736 2.25126216 2.28024616  
C -3.34188741 1.35232707 2.93368091  
H -2.94613185 3.12076717 1.78636093  
H -4.41531418 1.50895191 2.95465551  
C -0.03248922 4.08129206 1.10874204  
C 1.17742807 4.66829836 0.80095487  
H -0.96424710 4.58473329 0.86891288  
H 1.20376620 5.63680764 0.31263186  
C 2.40012004 2.79480432 1.76436808  
C 2.38659439 4.01759027 1.12523160  
H 3.34731786 2.34464604 2.03727972  
H 3.32868130 4.49863613 0.88061764  
H 3.14830281 -3.86389775 -2.05225675  
Mg -1.60116506 0.20866509 -2.31917978  
C -2.02039241 -0.96225162 -0.38826565  
C -3.36156549 -1.57804157 -0.82956924  
H -2.23158711 -0.44964898 0.57446980  
H -1.39231658 -1.83598401 -0.11204876  
H -4.05800160 -0.79012452 -1.14821698  
H -3.19909494 -2.20605608 -1.71481052  
Nd 0.29529801 0.05007064 0.34913765  
Mg -3.15789520 0.60890177 -4.63192308  
C -1.77674180 -1.18616808 -4.14074239  
C -2.65109957 -2.25474390 -4.82491111  
H -1.20201906 -1.73615945 -3.36961803



H -0.99616699 -0.88137721 -4.85666019  
H -3.41167797 -2.62720140 -4.12543353  
H -3.21358815 -1.81393758 -5.66451706  
C -4.04895320 -2.42266614 0.24907281  
H -3.35167002 -3.20035570 0.58245699  
H -4.24002272 -1.78960666 1.12388445  
C -1.87765127 -3.45570401 -5.38048277  
H -1.32369426 -3.92821524 -4.55874722  
H -1.12181231 -3.09123428 -6.08724071  
C -2.76285548 -4.49265119 -6.06438115  
H -3.50684136 -4.90268625 -5.37207134  
H -3.30471934 -4.05772183 -6.91157861  
C -5.35202014 -3.06728981 -0.21143070  
H -6.08259465 -2.31467101 -0.52722806  
H -5.18645345 -3.74433452 -1.05634478  
C 0.59066816 0.93066258 -2.18198521  
C 1.38235568 0.17448703 -3.07501794  
C 0.87490565 2.31409215 -2.15498931  
C 2.36195634 0.74428256 -3.88642852  
C 1.86556835 2.89832651 -2.94254754  
C 2.60722350 2.11198593 -3.81880223  
H 2.93502375 0.12082332 -4.56632856  
H 2.05071538 3.96690783 -2.87954278  
H -2.17581540 -5.33279599 -6.44865034  
H -5.81166241 -3.65288254 0.59106393  
C -2.87226726 1.33294848 -6.64758244  
H -3.60181662 0.83792285 -7.31223000  
H -3.15797143 2.39909819 -6.67489209  
C -1.47935271 1.18798758 -7.27480387  
H -1.19082987 0.12636714 -7.30467014  
H -0.72261391 1.66946131 -6.63746977  
C -1.33248066 1.75651435 -8.69199828  
H -1.59576658 2.82264686 -8.67463684  
H -2.07226915 1.27466450 -9.34538911  
C 0.06251580 1.58387815 -9.28676190  
H 0.34134978 0.52542520 -9.34419289  
H 0.12851725 1.99640986 -10.29940647  
H 0.82049129 2.08792561 -8.67650271  
C -2.91514215 2.02474549 -2.74251007  
C -2.36996607 3.20398643 -3.29757978  
C -3.97050434 2.23181847 -1.82805444  
C -2.83953779 4.47974291 -2.98471273  
C -4.44600743 3.49859020 -1.49028084  
C -3.88209581 4.62949613 -2.07471582  
H -2.39092864 5.35478062 -3.44700351  
H -5.25750507 3.60474541 -0.77513334  
O -5.31141253 0.43205293 -4.52573954  
C -6.11910929 -0.60201363 -5.18127922  
C -5.98625972 1.70992305 -4.63809883  
C -7.29648898 0.14467205 -5.81782980  
H -5.47889904 -1.03659044 -5.95523235  
C -6.52197506 -1.65775911 -4.17666041  
C -6.81860527 1.59274715 -5.89833405  
H -6.60760695 1.86041746 -3.74904004  
H -5.22747063 2.49329987 -4.67245520  
H -8.17759233 0.06962107 -5.17168752

H -7.55768041 -0.27708784 -6.79026956  
H -7.11330544 -2.43418548 -4.67259848  
H -5.64977273 -2.13627196 -3.72750753  
H -7.13016938 -1.22147155 -3.37901175  
H -7.63822590 2.31417852 -5.92104846  
H -6.19151529 1.75218011 -6.77948813  
H 0.30500677 2.97354714 -1.50269006  
H -4.25171195 5.61915007 -1.82247435  
H -1.54616417 3.13229667 -4.00563856  
H -4.44941734 1.37613324 -1.35476960  
H 3.37226818 2.56222603 -4.44432753  
H 1.23510140 -0.90119378 -3.15572835

SiFlu2\_BuBu\_Mg\_PhBu\_Mg\_PhMeTHF  
131

E: -2726.29703076 ; H: -2725.130227 ; G: -  
2725.310987 ; D: -0.3784538

C 2.86989235 -1.76836424 0.81628287  
C 2.07558442 -1.80226822 2.02560896  
C 1.07912723 -2.82664050 1.79077225  
C 1.22552288 -3.36733058 0.46332758  
C 2.35073997 -2.70910238 -0.14537932  
C -0.44586265 0.76834096 3.14526574  
C 0.99653903 0.75890803 3.03475025  
C 1.31485396 1.89841127 2.20547700  
C 0.10548838 2.53833805 1.75113951  
C -0.99900513 1.82666314 2.33675687  
Si 2.17371919 -0.64612266 3.52281856  
C 4.00207168 -1.00242902 0.44063715  
C 4.59952713 -1.20656848 -0.78819186  
H 4.43236903 -0.28301035 1.12626774  
H 5.48062287 -0.62909956 -1.05102094  
C 2.97915960 -2.89816864 -1.38699552  
C 4.10066734 -2.15601066 -1.70210980  
H 4.60116113 -2.30117411 -2.65361670  
C 0.04267882 -3.34723597 2.60372800  
C -0.77018668 -4.35649354 2.12714058  
H -0.10048572 -2.98080862 3.61217624  
H -1.54940374 -4.75732009 2.76812680  
C 0.38643912 -4.39505149 0.00296623  
C -0.60420451 -4.88548063 0.83155390  
H 0.52514169 -4.81004080 -0.99120632  
H -1.25240202 -5.68618458 0.49096392  
C 1.67662804 -1.49687907 5.14050661  
H 2.35764637 -2.33559429 5.32193715  
H 1.79548697 -0.78489191 5.96485032  
H 0.65999671 -1.88590280 5.19054726  
C 3.93140740 -0.04018384 3.88503926  
H 4.52994679 -0.89088718 4.22872355  
H 4.46914724 0.41654066 3.05436869  
H 3.89566342 0.69335622 4.69796172  
C -1.34908402 -0.04168028 3.88119622  
C -2.70345222 0.20722884 3.82154331  
H -0.97809585 -0.82824575 4.52616441  
H -3.38167363 -0.40452866 4.40856711  
C -2.38800506 2.05245697 2.28700556



|    |             |             |             |   |             |             |             |
|----|-------------|-------------|-------------|---|-------------|-------------|-------------|
| C  | 2.90382900  | -2.92035135 | -1.21961543 | C | -4.59826194 | 3.03090269  | -1.75151946 |
| C  | 4.15416201  | -2.37550531 | -1.41619590 | C | -3.91786823 | 4.22907263  | -1.94791539 |
| H  | 4.69746644  | -2.57609364 | -2.33359959 | H | -2.11394988 | 5.13578610  | -2.69318041 |
| C  | -0.21528088 | -3.19242235 | 2.64843724  | H | -5.58435262 | 3.03465813  | -1.29541484 |
| C  | -1.09543837 | -4.10808412 | 2.11340487  | C | 0.73119482  | 1.05309550  | -1.82094288 |
| H  | -0.33268556 | -2.87423041 | 3.67657563  | H | 0.69568249  | 1.98930196  | -1.23421552 |
| H  | -1.91003176 | -4.48206352 | 2.72597126  | H | 0.30042729  | 1.39024770  | -2.78253059 |
| C  | 0.08391815  | -4.14149555 | -0.00013533 | C | 2.20084433  | 0.72584715  | -2.12839451 |
| C  | -0.95335277 | -4.58503416 | 0.79141225  | H | 2.76589736  | 0.51810971  | -1.20427520 |
| H  | 0.20575390  | -4.52040878 | -1.01038331 | H | 2.26670213  | -0.20085317 | -2.71062202 |
| H  | -1.65987924 | -5.31229310 | 0.40558207  | C | 2.94647433  | 1.83518155  | -2.88062643 |
| C  | 1.32552924  | -1.24035737 | 5.22861805  | H | 2.88877226  | 2.76133437  | -2.29644033 |
| H  | 1.97381037  | -2.05920360 | 5.55953328  | H | 2.40971744  | 2.03715022  | -3.81768103 |
| H  | 1.36948815  | -0.45030913 | 5.98643791  | C | 4.40402641  | 1.51062091  | -3.18993522 |
| H  | 0.30310799  | -1.61758772 | 5.21487330  | H | 4.49352348  | 0.59092387  | -3.77821704 |
| C  | 3.73494626  | 0.02264966  | 4.03667939  | H | 4.88052387  | 2.31512426  | -3.75979232 |
| H  | 4.29518597  | -0.82983014 | 4.43605605  | H | 4.98469071  | 1.37019558  | -2.27274398 |
| H  | 4.32193354  | 0.44955480  | 3.22349354  | C | -4.79039096 | -0.48981194 | -5.11599300 |
| H  | 3.67087280  | 0.77981128  | 4.82576044  | H | -4.63336025 | -1.30287054 | -5.84537331 |
| C  | -1.52680928 | 0.16647248  | 3.59846974  | H | -5.23299367 | -0.99314829 | -4.23961823 |
| C  | -2.86058243 | 0.50803038  | 3.49574586  | C | -5.82675864 | 0.48681938  | -5.68665867 |
| H  | -1.24306080 | -0.70009941 | 4.18219862  | H | -5.43497021 | 0.95335003  | -6.60383126 |
| H  | -3.60503181 | -0.10335141 | 3.99650869  | H | -5.98868279 | 1.32017315  | -4.98621174 |
| C  | -2.34507461 | 2.42841081  | 2.11814589  | C | -7.19584180 | -0.11975113 | -6.02024747 |
| C  | -3.27646882 | 1.63377891  | 2.75797448  | H | -7.05575110 | -0.94401132 | -6.73212677 |
| H  | -2.66310725 | 3.29767223  | 1.55085608  | H | -7.61205414 | -0.57413823 | -5.11133202 |
| H  | -4.33211098 | 1.87717605  | 2.69775046  | C | -8.19355628 | 0.88446814  | -6.59095370 |
| C  | 0.34482944  | 3.92697803  | 0.93477544  | H | -7.82263642 | 1.32998440  | -7.52135860 |
| C  | 1.61372274  | 4.34919075  | 0.58673195  | H | -9.15971348 | 0.41914870  | -6.81359377 |
| H  | -0.52669632 | 4.50000374  | 0.63319592  | H | -8.37911207 | 1.70455811  | -5.88785047 |
| H  | 1.74700650  | 5.25913788  | 0.01092285  | C | -1.14845063 | -1.23500965 | -4.11162838 |
| C  | 2.61605715  | 2.44753428  | 1.73033471  | C | -1.70508641 | -2.52692221 | -4.24712475 |
| C  | 2.74115195  | 3.60389726  | 0.98399981  | C | 0.12914050  | -1.07791799 | -4.69367842 |
| H  | 3.50808754  | 1.91761514  | 2.04044764  | C | -1.05145992 | -3.57171900 | -4.89906564 |
| H  | 3.73204068  | 3.95105174  | 0.70714548  | C | 0.80335594  | -2.11050587 | -5.34610276 |
| H  | 2.45637775  | -3.55835438 | -1.97572639 | C | 0.21036319  | -3.36509434 | -5.45008645 |
| Mg | -1.29856032 | 0.01761612  | -2.18894961 | H | -1.52704194 | -4.54527595 | -4.98044752 |
| C  | -2.02468823 | -0.92599972 | -0.24408123 | H | 1.78781672  | -1.93775411 | -5.77266948 |
| C  | -3.15822992 | -1.72111781 | -0.92037377 | O | -2.09683054 | 1.48259576  | -6.18681432 |
| H  | -2.48734966 | -0.09792596 | 0.32318037  | C | -1.25846049 | 1.03766284  | -7.30765084 |
| H  | -1.65135762 | -1.61959925 | 0.53646926  | C | -2.63002170 | 2.79950104  | -6.46437630 |
| H  | -3.58682013 | -1.15850840 | -1.76567636 | C | -1.24661612 | 2.21964422  | -8.28008896 |
| H  | -2.74409313 | -2.63725335 | -1.35783013 | H | -0.26265686 | 0.87762297  | -6.88484814 |
| Nd | 0.43941857  | -0.27993828 | 0.50431369  | C | -1.78993884 | -0.25452014 | -7.88622650 |
| Mg | -2.85878879 | 0.30891036  | -4.58553406 | C | -1.62196881 | 3.41797256  | -7.41013036 |
| C  | -4.30993300 | -2.09555746 | 0.01829252  | H | -3.61439560 | 2.69726010  | -6.93390691 |
| H  | -3.89465262 | -2.63620732 | 0.87735911  | H | -2.74122176 | 3.31973935  | -5.51238455 |
| H  | -4.75058720 | -1.17616125 | 0.42308770  | H | -1.99974859 | 2.06800220  | -9.06054473 |
| C  | -5.39268141 | -2.93919835 | -0.64649117 | H | -0.27519612 | 2.32612522  | -8.76691778 |
| H  | -5.84568302 | -2.41675212 | -1.49574766 | H | -1.16422891 | -0.55940132 | -8.73122964 |
| H  | -4.98753331 | -3.88552429 | -1.02147158 | H | -1.76949720 | -1.06362542 | -7.15224429 |
| H  | -6.19696156 | -3.18160831 | 0.05558509  | H | -2.81539958 | -0.13005580 | -8.24506718 |
| C  | -2.73715059 | 1.74692937  | -2.74310653 | H | -2.04432641 | 4.24824399  | -7.97970598 |
| C  | -2.09180472 | 2.99138962  | -2.92079918 | H | -0.75476392 | 3.78647940  | -6.85366355 |
| C  | -4.01420871 | 1.82728667  | -2.14386931 | H | 0.72542305  | -4.17464911 | -5.95877636 |
| C  | -2.65684065 | 4.20745847  | -2.53592324 | H | -2.69432691 | -2.73022067 | -3.84218310 |

H 0.63030726 -0.11297346 -4.63600497  
 H -4.58859268 0.91764932 -1.97973289  
 H -4.36675806 5.17077622 -1.64591753  
 H -1.10149100 3.02603794 -3.37254162  
 SiFlu2\_PhE\_adduct  
 69  
 E: -1427.85724572 ; H: -1427.270998 ; G: -  
 1427.375996 ; D: -0.21491933  
 Nd 0.37897205 -0.09704243 0.04151570  
 C 0.92859474 -0.78374395 2.41703832  
 C 0.21485092 2.36042061 -1.48192978  
 C -1.05065119 1.96616893 -0.90037382  
 C -0.97150844 2.38912893 0.48302798  
 C 0.32044127 2.96524778 0.75465892  
 C 1.06771348 2.93910200 -0.47475523  
 C -2.04563195 -1.65986803 -0.16414427  
 C -1.78013999 -0.86902971 -1.34995328  
 C -0.75227065 -1.59590836 -2.06057865  
 C -0.34521865 -2.75191032 -1.29712547  
 C -1.16594386 -2.79726845 -0.11608972  
 Si -2.38619275 0.89138403 -1.71110756  
 C 2.34597249 3.42705129 -0.80005078  
 H 2.96531336 3.88817970 -0.03614039  
 C 0.71848397 2.27867913 -2.80454387  
 H 0.10570333 1.87566478 -3.60137689  
 C 2.79456391 3.34160554 -2.10304578  
 H 3.77255509 3.72842641 -2.36953246  
 C 1.97619296 2.76727554 -3.09790257  
 H 2.33669853 2.72388668 -4.12117433  
 C -1.90220739 2.33046917 1.55096630  
 H -2.88682513 1.90653866 1.40067950  
 C 0.62564297 3.50326931 2.01616984  
 H 1.59359949 3.96169820 2.19504135  
 C -0.32247164 3.46363131 3.01759889  
 H -0.10378059 3.88690816 3.99227497  
 C -1.57832687 2.86955112 2.77971866  
 H -2.31200980 2.84148490 3.57954121  
 C -1.24467019 -3.73154222 0.93093016  
 H -0.58751953 -4.59570463 0.94433711  
 C -2.96729727 -1.49248177 0.89822679  
 H -3.65880938 -0.65929744 0.89904257  
 C -2.17025130 -3.54511847 1.93550061  
 H -2.24145829 -4.25888850 2.74909401  
 C -3.02311022 -2.42389983 1.91473506  
 H -3.74555067 -2.29345794 2.71447112  
 C 0.63361153 -3.63670993 -1.78666279  
 H 0.89929111 -4.52321962 -1.21812487  
 C 1.23231704 -3.38340905 -3.00449335  
 H 1.97739038 -4.06684070 -3.39825411  
 C -0.09322449 -1.35999720 -3.29447754  
 H -0.37029137 -0.51443310 -3.91162986  
 C 0.86767547 -2.24204326 -3.74872144  
 H 1.34199888 -2.06099177 -4.70848496  
 C 3.76307489 -0.33665943 -0.01238041  
 C 3.40251164 -0.50009191 -1.28617032  
 H 3.94645142 0.64977129 0.40535362

H 3.92313920 -1.17890824 0.65369371  
 H 3.25859821 -1.48842873 -1.71551820  
 H 3.28593310 0.34784415 -1.95690006  
 C -2.59044118 1.23521001 -3.56200760  
 H -3.43160132 0.63886555 -3.93245241  
 H -2.83958848 2.29205684 -3.70636892  
 H -1.73198519 1.00868084 -4.19414272  
 C -4.11754284 1.22354060 -1.02202396  
 H -4.42972882 2.22819340 -1.32757203  
 H -4.82049920 0.50696193 -1.46068917  
 H -4.22491408 1.16814085 0.06109839  
 C 1.65077174 -1.98871851 2.52037345  
 H 1.85229419 -2.58607819 1.62735603  
 C 2.13676780 -2.48663469 3.73039138  
 H 2.68766091 -3.42361798 3.75692707  
 C 1.90566297 -1.78081230 4.90660952  
 H 2.27737372 -2.15753412 5.85506656  
 C 1.19184655 -0.58629581 4.85325308  
 C 0.71704505 -0.10751844 3.63242922  
 H 1.00477573 -0.02761399 5.76714527  
 H 0.16534138 0.83057419 3.63899817

SiFlu2\_PhE\_product

69  
 E: -1427.89435408 ; H: -1427.307271 ; G: -  
 1427.409542 ; D: -0.21573672  
 Nd 0.21829146 -0.03257527 0.14191526  
 C 2.91526313 -0.94500995 1.92612634  
 C 0.13401193 2.43207543 -1.41067593  
 C -1.16126006 2.01583031 -0.90651572  
 C -1.15920094 2.40423800 0.48803762  
 C 0.11684678 2.97769995 0.84229994  
 C 0.92524229 2.99399444 -0.34791215  
 C -2.18143129 -1.57017116 -0.12404072  
 C -1.86598743 -0.83991650 -1.33321996  
 C -0.81210079 -1.60688488 -1.96581308  
 C -0.44753686 -2.72969795 -1.13927434  
 C -1.30272285 -2.70424862 0.01737246  
 Si -2.43333523 0.91404621 -1.78702659  
 C 2.22367385 3.47593812 -0.58684428  
 H 2.80167664 3.91619992 0.22051448  
 C 0.71371753 2.36703234 -2.70122338  
 H 0.15014750 1.97297880 -3.53761683  
 C 2.75015933 3.40121140 -1.85980664  
 H 3.74929140 3.77414271 -2.05919538  
 C 1.98998752 2.84738228 -2.90953096  
 H 2.41687719 2.80501448 -3.90687460  
 C -2.12883026 2.27819766 1.51670074  
 H -3.10568328 1.86368168 1.30146159  
 C 0.36840812 3.43891771 2.14745451  
 H 1.32059376 3.90349800 2.38707458  
 C -0.60911753 3.31427128 3.11400527  
 H -0.43004814 3.67579254 4.12117387  
 C -1.85100187 2.72813092 2.79235399  
 H -2.61332611 2.64524810 3.56109663  
 C -1.40992669 -3.57159418 1.11992648

|   |             |             |             |    |             |             |             |
|---|-------------|-------------|-------------|----|-------------|-------------|-------------|
| H | -0.75705835 | -4.43570948 | 1.19905854  | Si | -3.50300913 | 0.86684522  | -2.18741192 |
| C | -3.14018533 | -1.34842563 | 0.89734714  | C  | 1.17789281  | 3.46342791  | -1.16319393 |
| H | -3.83991181 | -0.52549973 | 0.82041718  | H  | 1.78059850  | 3.91244541  | -0.37901768 |
| C | -2.36196431 | -3.32559547 | 2.08769241  | C  | -0.40165875 | 2.33832539  | -3.21915355 |
| H | -2.46014560 | -3.99279812 | 2.93751896  | H  | -0.99275046 | 1.94128670  | -4.03501989 |
| C | -3.22224301 | -2.21356363 | 1.96959254  | C  | 1.65204193  | 3.40191008  | -2.45746455 |
| H | -3.97592197 | -2.04368830 | 2.73252814  | H  | 2.63431731  | 3.79520705  | -2.69736932 |
| C | 0.54239947  | -3.64019824 | -1.54692404 | C  | 0.85676497  | 2.84073887  | -3.47844162 |
| H | 0.78070497  | -4.50084373 | -0.92878721 | H  | 1.24042590  | 2.81327471  | -4.49360522 |
| C | 1.19761715  | -3.43794974 | -2.74405855 | C  | -3.06286136 | 2.19030671  | 1.11407756  |
| H | 1.96011296  | -4.13590696 | -3.07348191 | H  | -4.03353486 | 1.74191692  | 0.94359703  |
| C | -0.09587370 | -1.42112202 | -3.17467502 | C  | -0.57990466 | 3.43362049  | 1.63266919  |
| H | -0.33192553 | -0.59291203 | -3.83026598 | H  | 0.36589950  | 3.92997897  | 1.82981809  |
| C | 0.87796510  | -2.32461005 | -3.54701324 | C  | -1.51974593 | 3.30384679  | 2.63377153  |
| H | 1.40527900  | -2.17856863 | -4.48464291 | H  | -1.31601241 | 3.68831772  | 3.62754178  |
| C | 3.55994942  | -0.44229027 | 0.65402357  | C  | -2.75073100 | 2.66815553  | 2.37041603  |
| C | 2.58876764  | -0.50362333 | -0.54369389 | H  | -3.47768843 | 2.56795917  | 3.17063551  |
| H | 3.87700944  | 0.59361629  | 0.81861882  | C  | -2.31841034 | -3.78328098 | 0.39462024  |
| H | 4.48164789  | -1.01696784 | 0.47691599  | H  | -1.66367281 | -4.64980113 | 0.38636982  |
| H | 2.57981675  | -1.52307741 | -0.95905240 | C  | -4.06195440 | -1.55887465 | 0.39437018  |
| H | 2.95317003  | 0.14713228  | -1.34974820 | H  | -4.76731321 | -0.73712796 | 0.40214646  |
| C | -2.48786075 | 1.20226348  | -3.65734956 | C  | -3.25269534 | -3.62612569 | 1.39623820  |
| H | -3.26468707 | 0.56057545  | -4.08767580 | H  | -3.33284966 | -4.36367110 | 2.18774491  |
| H | -2.76732928 | 2.24352424  | -3.85132864 | C  | -4.11522956 | -2.50946133 | 1.39247205  |
| H | -1.56541261 | 1.00381963  | -4.20296381 | H  | -4.84932516 | -2.40500223 | 2.18557296  |
| C | -4.21246182 | 1.27063370  | -1.24151776 | C  | -0.40553491 | -3.60667846 | -2.29633987 |
| H | -4.49131068 | 2.26900187  | -1.59619939 | H  | -0.12164424 | -4.49277761 | -1.73601743 |
| H | -4.88453371 | 0.54719075  | -1.71574390 | C  | 0.19913570  | -3.32266570 | -3.50375128 |
| H | -4.40393269 | 1.24416189  | -0.16856867 | H  | 0.96858226  | -3.97960100 | -3.89552148 |
| C | 2.71684374  | -2.31601794 | 2.14461427  | C  | -1.16896988 | -1.32762208 | -3.78178180 |
| H | 3.08208754  | -3.02724210 | 1.40930583  | H  | -1.45519346 | -0.47719754 | -4.38789459 |
| C | 2.07881743  | -2.77657077 | 3.29196849  | C  | -0.18679611 | -2.18259221 | -4.23893859 |
| H | 1.94898677  | -3.84352085 | 3.44435228  | H  | 0.29505303  | -1.97711143 | -5.18986970 |
| C | 1.61016856  | -1.87720403 | 4.24814464  | C  | 2.12730673  | -0.67137493 | -0.03882204 |
| H | 1.11324750  | -2.23890551 | 5.14221073  | C  | 1.69430634  | -0.39491303 | -1.32519775 |
| C | 1.79500694  | -0.51341360 | 4.04986144  | H  | 2.64108840  | 0.09271357  | 0.53441868  |
| C | 2.44424597  | -0.05519890 | 2.90221558  | H  | 2.38694093  | -1.68675791 | 0.23715534  |
| H | 1.44742835  | 0.19844532  | 4.79212039  | H  | 1.53686102  | -1.20548400 | -2.03383721 |
| H | 2.61573294  | 1.01076190  | 2.77419621  | H  | 1.82614714  | 0.60222966  | -1.74133257 |

SiFlu2\_PhE\_TS

69

E: -1427.84242718 ; H: -1427.257465 ; G: -1427.357985 ; D: -0.21830551

|    |             |             |             |
|----|-------------|-------------|-------------|
| Nd | -0.73535616 | -0.09272831 | -0.40785263 |
| C  | 0.69071593  | -0.79620941 | 1.66172638  |
| C  | -0.92903253 | 2.38606923  | -1.90400637 |
| C  | -2.19871461 | 1.96087268  | -1.34935919 |
| C  | -2.13786953 | 2.33460663  | 0.04664029  |
| C  | -0.86174218 | 2.93545118  | 0.34735397  |
| C  | -0.10179437 | 2.95898626  | -0.87184070 |
| C  | -3.12994813 | -1.69475412 | -0.66643646 |
| C  | -2.87763609 | -0.89104529 | -1.84256845 |
| C  | -1.82862490 | -1.59021088 | -2.55355830 |
| C  | -1.40954413 | -2.75177230 | -1.80616555 |
| C  | -2.23323678 | -2.82274320 | -0.63010899 |

|    |             |             |             |
|----|-------------|-------------|-------------|
| Si | -3.50300913 | 0.86684522  | -2.18741192 |
| C  | 1.17789281  | 3.46342791  | -1.16319393 |
| H  | 1.78059850  | 3.91244541  | -0.37901768 |
| C  | -0.40165875 | 2.33832539  | -3.21915355 |
| H  | -0.99275046 | 1.94128670  | -4.03501989 |
| C  | 1.65204193  | 3.40191008  | -2.45746455 |
| H  | 2.63431731  | 3.79520705  | -2.69736932 |
| C  | 0.85676497  | 2.84073887  | -3.47844162 |
| H  | 1.24042590  | 2.81327471  | -4.49360522 |
| C  | -3.06286136 | 2.19030671  | 1.11407756  |
| H  | -4.03353486 | 1.74191692  | 0.94359703  |
| C  | -0.57990466 | 3.43362049  | 1.63266919  |
| H  | 0.36589950  | 3.92997897  | 1.82981809  |
| C  | -1.51974593 | 3.30384679  | 2.63377153  |
| H  | -1.31601241 | 3.68831772  | 3.62754178  |
| C  | -2.75073100 | 2.66815553  | 2.37041603  |
| H  | -3.47768843 | 2.56795917  | 3.17063551  |
| C  | -2.31841034 | -3.78328098 | 0.39462024  |
| H  | -1.66367281 | -4.64980113 | 0.38636982  |
| C  | -4.06195440 | -1.55887465 | 0.39437018  |
| H  | -4.76731321 | -0.73712796 | 0.40214646  |
| C  | -3.25269534 | -3.62612569 | 1.39623820  |
| H  | -3.33284966 | -4.36367110 | 2.18774491  |
| C  | -4.11522956 | -2.50946133 | 1.39247205  |
| H  | -4.84932516 | -2.40500223 | 2.18557296  |
| C  | -0.40553491 | -3.60667846 | -2.29633987 |
| H  | -0.12164424 | -4.49277761 | -1.73601743 |
| C  | 0.19913570  | -3.32266570 | -3.50375128 |
| H  | 0.96858226  | -3.97960100 | -3.89552148 |
| C  | -1.16896988 | -1.32762208 | -3.78178180 |
| H  | -1.45519346 | -0.47719754 | -4.38789459 |
| C  | -0.18679611 | -2.18259221 | -4.23893859 |
| H  | 0.29505303  | -1.97711143 | -5.18986970 |
| C  | 2.12730673  | -0.67137493 | -0.03882204 |
| C  | 1.69430634  | -0.39491303 | -1.32519775 |
| H  | 2.64108840  | 0.09271357  | 0.53441868  |
| H  | 2.38694093  | -1.68675791 | 0.23715534  |
| H  | 1.53686102  | -1.20548400 | -2.03383721 |
| H  | 1.82614714  | 0.60222966  | -1.74133257 |
| C  | -3.68827538 | 1.23240091  | -4.03577841 |
| H  | -4.49520782 | 0.60853248  | -4.43568575 |
| H  | -3.97864834 | 2.28059828  | -4.16565536 |
| H  | -2.80737770 | 1.05553207  | -4.65241311 |
| C  | -5.24941357 | 1.16014716  | -1.51760755 |
| H  | -5.57635797 | 2.16190227  | -1.81724090 |
| H  | -5.93250383 | 0.43529889  | -1.97380338 |
| H  | -5.37146011 | 1.09212263  | -0.43663025 |
| C  | 0.48245642  | -2.11495296 | 2.09985103  |
| H  | 0.38747821  | -2.92085408 | 1.37381066  |
| C  | 0.40524775  | -2.43975377 | 3.45249493  |
| H  | 0.23823287  | -3.46953890 | 3.75591493  |
| C  | 0.55160597  | -1.44391857 | 4.41458710  |
| H  | 0.49973191  | -1.69215811 | 5.47016575  |
| C  | 0.77265489  | -0.12943192 | 4.01371191  |
| C  | 0.84643112  | 0.18243743  | 2.65689696  |
| H  | 0.89296333  | 0.65285673  | 4.75808093  |

H 1.03453718 1.21835914 2.38093775
